# Supplementary material for: Iron(ii)-catalyzed annulation to construct novel quinone-fused cyclopenta[2,1-b]indoles: a promising type I photosensitizer
Source: Royal Society of Chemistry journal article supplement (doi:10.1039/d4qo00708e), 2024-01-01

## Supporting Information

### **Iron(II)-catalyzed annulation to construct novel quinone-fused cyclopenta[2,1-*b*]indoles: A promising Type I photosensitizer**

Hong Xu<sup>a, b, c, †</sup>, Xiao-Chun Liu<sup>a, †</sup>, Bei Wang<sup>a</sup>, Fuyu Li<sup>a, b, c</sup>, Yao Xiao<sup>c</sup>, Dongwei  
Huang<sup>c</sup>, Ning Ma<sup>a</sup>, Ya-Hui Zhang<sup>a\*</sup>, Jiyu Wang<sup>a, b, c\*</sup>

Ji-Yu Wang: [Jiyuwang@cioc.ac.cn](mailto:Jiyuwang@cioc.ac.cn); Ya-Hui Zhang: [yahuizhang@mail.xhu.edu.cn](mailto:yahuizhang@mail.xhu.edu.cn).

<sup>†</sup>These authors contributed equally to this work.

---

*\*Corresponding author:*

*Ya-Hui Zhang: [yahuizhang@mail.xhu.edu.cn](mailto:yahuizhang@mail.xhu.edu.cn); Ji-Yu Wang: [Jiyuwang@cioc.ac.cn](mailto:Jiyuwang@cioc.ac.cn).*

*<sup>†</sup>Hong Xu and Xiao-Chun Liu contributed equally to this work.*

## Contents

|                                                                                 |           |
|---------------------------------------------------------------------------------|-----------|
| <b>1. General Information .....</b>                                             | <b>3</b>  |
| <b>2. Methods and Experimental Procedures.....</b>                              | <b>5</b>  |
| 2.1 Tables for the optimization of reaction conditions .....                    | 5         |
| 2.2 General procedures for the Synthesis of Substrates and Products .....       | 8         |
| 2.3 Mechanistic experiments .....                                               | 10        |
| 2.4 Photophysical properties .....                                              | 10        |
| 2.5 Preparation of photosensitizers.....                                        | 13        |
| 2.6 Total ROS detection by indicator DCFH .....                                 | 13        |
| 2.7 Detection of <sup>1</sup> O <sub>2</sub> Generation by indicator ABDA ..... | 16        |
| 2.8 EPR Analysis .....                                                          | 17        |
| 2.9 TD-DFT calculation .....                                                    | 18        |
| 2.10 Electrochemical Experiments .....                                          | 18        |
| 2.11 Cell Culture .....                                                         | 19        |
| 2.12 In Vitro Cytotoxicity .....                                                | 19        |
| 2.13 Live/Dead Cell Staining.....                                               | 19        |
| 2.14 Intracellular ROS Generation .....                                         | 20        |
| <b>3. X-Ray Crystallographic Data.....</b>                                      | <b>21</b> |
| 3.1 X-Ray Crystallographic Data of 3aa.....                                     | 21        |
| 3.2 X-Ray Crystallographic Data of 3af.....                                     | 28        |
| 3.3 X-Ray Crystallographic Data of 4ka .....                                    | 40        |
| <b>4. Characterization of compounds.....</b>                                    | <b>48</b> |
| <b>5. References .....</b>                                                      | <b>63</b> |
| <b>6. NMR Spectra of New Compounds.....</b>                                     | <b>64</b> |

## 1. General Information

Unless otherwise noted, all reagents were from commercial sources and used as received without further purification. Column chromatography was generally performed on silica gel (200-300 mesh) and reactions were monitored by thin layer chromatography (GF-254 silica gel plate) using UV light (254 nm) to visualize the course of the reactions.  $^1\text{H}$ ,  $^{13}\text{C}$  NMR spectra were recorded at 400 MHz on an Agilent spectrometer. Data are reported in the following order: chemical shift ( $\delta$ ) in ppm; multiplicities are indicated s (singlet), d (doublet), t (triplet), dd (doublet of doublets), m (multiplet); coupling constants (J) are in Hertz (Hz). NMR spectra were taken using TMS ( $^1\text{H}$ ,  $\delta = 0$ ),  $\text{CDCl}_3$  ( $^1\text{H}$ ,  $\delta = 7.26$ ), and  $\text{CDCl}_3$  ( $^{13}\text{C}$ , CPD  $\delta = 77.16$ ) as the internal standards, respectively. HRMS were undertaken on a Thermo Scientific LTQ Orbitrap XL instrument. Melting points were tested with Hanon MP430. UV spectrums were tested with UNICO 4802 UV-VIS double beam spectrophotometer. The fluorescence emission spectrums were tested with FluroMax-4 Fluorescence spectrophotometer. Dulbecco's modified eagle medium (DMEM) and FBS were purchased from Gibco (USA). Penicillin-streptomycin was purchased from Macgene (China). The 2',7'-Dichlorofluorescein diacetate (DCFH-DA) and 9,10-Anthracenediyl-bis(methylene) dimalonic acid (ABDA) required for the active oxygen test were purchased from Shanghai McLean Biochemical Technology Co., Ltd. Thiazolyl Blue(MTT) were purchased from Bide Pharmatech Co., Ltd. Calcein-AM/PI Live-Dead Cell Staining Kit were purchased from Beijing Solarbio Science and Technology Co., Ltd. DCFH-DA was purchased from Beyotime. The absorbance intensity of the ABDA indicator collected on the Thermo Fisher UV-2700 spectrophotometer. Record cell imaging using a confocal laser PL microscope (Zeiss LSM 780). Electron paramagnetic resonance (EPR) spectra were measured on Bruker Paramagnetic Resonance Spectrometer EMXplus. Redox potential was measured on Chi660e electrochemical workstation. TD-DFT calculations were performed on Gaussian 09 program. The ground-state ( $S_0$ ) geometries were optimized with B3LYP

by using 6-311G(d) basis sets. The other Chemicals and analytical grade solvents were purchased from Adamas-Beta and used without further purification unless otherwise stated.

The indolylquinones (**1a-1u**) were prepared according to the reported literature procedure.<sup>[1]</sup>

## 2. Methods and Experimental Procedures

### 2.1 Tables for the optimization of reaction conditions

Table S1 Screening of the necessity of each substance <sup>a, b</sup>

| Entry | Catalyst (20 mol%)                   | Oxidant (2 eq)                               | Base (0.5 eq)                   | Yield/<br>% |
|-------|--------------------------------------|----------------------------------------------|---------------------------------|-------------|
| 1     | FeSO <sub>4</sub> ·7H <sub>2</sub> O | K <sub>2</sub> S <sub>2</sub> O <sub>8</sub> | Cs <sub>2</sub> CO <sub>3</sub> | 78          |
| 2     | FeSO <sub>4</sub> ·7H <sub>2</sub> O | K <sub>2</sub> S <sub>2</sub> O <sub>8</sub> | -                               | N.D         |
| 3     | -                                    | K <sub>2</sub> S <sub>2</sub> O <sub>8</sub> | Cs <sub>2</sub> CO <sub>3</sub> | 37          |
| 4     | FeSO <sub>4</sub> ·7H <sub>2</sub> O | -                                            | Cs <sub>2</sub> CO <sub>3</sub> | N.D         |

Reaction conditions: <sup>a</sup> **1a** (0.1 mmol), **2a** (0.2 mmol), Cs<sub>2</sub>CO<sub>3</sub> (0.5 equiv), FeSO<sub>4</sub>·7H<sub>2</sub>O (20 mol%), K<sub>2</sub>S<sub>2</sub>O<sub>8</sub> (2 equiv), CH<sub>3</sub>CN (1 mL), T<sub>1</sub>= T<sub>2</sub>=65 °C, t<sub>1</sub>= t<sub>2</sub>=3 h. <sup>b</sup> Isolated yield. <sup>c</sup> N.D means not detected.

Table S2 Screening of the necessity of base <sup>a, b</sup>

| Entry | Base (0.5 eq)                   | t/h   | Yield/<br>% |
|-------|---------------------------------|-------|-------------|
| 1     | K <sub>3</sub> PO <sub>4</sub>  | 24+8  | 10          |
| 2     | Et <sub>3</sub> N               | 24+8  | 24          |
| 3     | DMAP                            | 24+6  | 11          |
| 4     | DBU                             | 12    | 15          |
| 5     | Cs <sub>2</sub> CO <sub>3</sub> | 3     | 78          |
| 6     | NaHCO <sub>3</sub>              | 24+12 | 9           |
| 7     | Na <sub>2</sub> CO <sub>3</sub> | 24+12 | 20          |
| 8     | NaOH                            | 24+12 | 17          |
| 9     | PPh <sub>3</sub>                | 5     | N.D         |
| 10    | NaH                             | 24+12 | 13          |
| 11    | t-BuOK                          | 24+12 | 18          |
| 12    | Morpholine                      | 24+12 | 8           |

|    |    |    |     |
|----|----|----|-----|
| 13 | Py | 36 | N.D |
|----|----|----|-----|

Reaction conditions: <sup>a</sup> **1a** (0.1 mmol), **2a** (0.2 mmol), base (0.5 equiv), FeSO<sub>4</sub>·7H<sub>2</sub>O (20 mol%), K<sub>2</sub>S<sub>2</sub>O<sub>8</sub> (2 equiv), CH<sub>3</sub>CN (1 mL), T<sub>1</sub>= T<sub>2</sub>=65 °C, t=t<sub>1</sub>+t<sub>2</sub>. <sup>b</sup> Isolated yield. <sup>c</sup> N.D means not detected.

**Table S3** Screening of catalyst <sup>a, b</sup>

| Entry | Catalyst (20 mol%)                                   | t <sub>2</sub> /h | Yield/% |
|-------|------------------------------------------------------|-------------------|---------|
| 1     | FeBr <sub>3</sub>                                    | 3                 | 56      |
| 2     | FeCl <sub>3</sub> ·6H <sub>2</sub> O                 | 3                 | N.D     |
| 3     | Fe(NO <sub>3</sub> ) <sub>3</sub> ·9H <sub>2</sub> O | 1.5               | 59      |
| 4     | Fe(OTs) <sub>3</sub> ·6H <sub>2</sub> O              | 3                 | N.D     |
| 5     | Fe(OTf) <sub>3</sub>                                 | 3                 | 30      |
| 6     | Fe(C <sub>2</sub> O <sub>4</sub> ) <sub>3</sub>      | 3                 | 28      |
| 7     | FeS                                                  | 3                 | N.D     |
| 8     | FeC <sub>2</sub> O <sub>4</sub>                      | 3                 | N.D     |
| 9     | FeCl <sub>2</sub> ·4H <sub>2</sub> O                 | 3                 | 59      |
| 10    | CuSO <sub>4</sub> ·5H <sub>2</sub> O                 | 1.5               | 59      |
| 11    | Cu(acac) <sub>2</sub>                                | 3                 | N.D     |
| 12    | CuBr                                                 | 3                 | N.D     |
| 13    | CoCl <sub>2</sub>                                    | 3                 | 57      |
| 14    | NiCl <sub>2</sub>                                    | 3                 | 45      |
| 15    | Ni(OTf) <sub>2</sub>                                 | 3                 | 39      |
| 16    | Zn(NO <sub>3</sub> ) <sub>2</sub>                    | 3                 | 53      |
| 17    | Co(NO <sub>3</sub> ) <sub>2</sub>                    | 3                 | 56      |
| 18    | BiCl <sub>3</sub>                                    | 1.5               | 63      |
| 19    | ---                                                  | 3                 | 37      |

Reaction conditions: <sup>a</sup> **1a** (0.1 mmol), **2a** (0.2 mmol), Cs<sub>2</sub>CO<sub>3</sub> (0.5 equiv), catalyst (20 mol%), K<sub>2</sub>S<sub>2</sub>O<sub>8</sub> (2 equiv), CH<sub>3</sub>CN (1 mL), T<sub>1</sub>= T<sub>2</sub>=65 °C, t<sub>1</sub>= 3 h. <sup>b</sup> Isolated yield. <sup>c</sup> N.D means not detected.

**Table S4** Screening of oxidant <sup>a, b</sup>

| Entry | Oxidant (2 eq)                | Yield/% |
|-------|-------------------------------|---------|
| 1     | H <sub>2</sub> O <sub>2</sub> | N.D     |
| 2     | DTBP                          | N.D     |
| 3     | TBHP                          | N.D     |
| 4     | BPO                           | 10%     |
| 5     | PCC                           | N.D     |
| 6     | TEMPO                         | N.D     |
| 7     | DMSO                          | N.D     |

Reaction conditions: <sup>a</sup> **1a** (0.1 mmol), **2a** (0.2 mmol), Cs<sub>2</sub>CO<sub>3</sub> (0.5 equiv), FeSO<sub>4</sub>·7H<sub>2</sub>O (20 mol%), oxidant (2 equiv), CH<sub>3</sub>CN (1 mL), T<sub>1</sub>= T<sub>2</sub>=65 °C, t<sub>1</sub>= t<sub>2</sub>=3 h. <sup>b</sup> Isolated yield. <sup>c</sup> N.D means not detected.

**Table S5** Screening of the amount of catalyst and oxidant <sup>a, b</sup>

| Entry | Catlyst(x mol%)                           | Oxidant(y equiv)                                   | Yield/% |
|-------|-------------------------------------------|----------------------------------------------------|---------|
| 1     | FeSO <sub>4</sub> ·7H <sub>2</sub> O (5)  | K <sub>2</sub> S <sub>2</sub> O <sub>8</sub> (2)   | 28      |
| 2     | FeSO <sub>4</sub> ·7H <sub>2</sub> O (10) | K <sub>2</sub> S <sub>2</sub> O <sub>8</sub> (2)   | 43      |
| 3     | FeSO <sub>4</sub> ·7H <sub>2</sub> O (15) | K <sub>2</sub> S <sub>2</sub> O <sub>8</sub> (2)   | 66      |
| 4     | FeSO <sub>4</sub> ·7H <sub>2</sub> O (20) | K <sub>2</sub> S <sub>2</sub> O <sub>8</sub> (2)   | 75      |
| 5     | FeSO <sub>4</sub> ·7H <sub>2</sub> O (20) | K <sub>2</sub> S <sub>2</sub> O <sub>8</sub> (1.5) | 48      |
| 6     | FeSO <sub>4</sub> ·7H <sub>2</sub> O (20) | K <sub>2</sub> S <sub>2</sub> O <sub>8</sub> (1)   | 25      |

Reaction conditions: <sup>a</sup> **1a** (0.1 mmol), **2a** (0.2 mmol), Cs<sub>2</sub>CO<sub>3</sub> (0.5 equiv), FeSO<sub>4</sub>·7H<sub>2</sub>O (x mol%), K<sub>2</sub>S<sub>2</sub>O<sub>8</sub> (y equiv), CH<sub>3</sub>CN (1 mL), T<sub>1</sub>= T<sub>2</sub>=65 °C, t<sub>1</sub>= t<sub>2</sub>=3 h. <sup>b</sup> Isolated yield. <sup>c</sup> N.D means not detected.

**Table S6** Screening of solvent and temperature <sup>a, b</sup>

| Entry | Solvent     | T/°C | Yield/% |
|-------|-------------|------|---------|
| 1     | 1,4-Dioxane | 65   | trace   |
| 2     | EA          | 65   | trace   |
| 3     | THF         | 65   | trace   |

|    |                    |    |       |
|----|--------------------|----|-------|
| 4  | toluene            | 65 | trace |
| 5  | DMF                | 65 | N.D   |
| 6  | DMSO               | 65 | N.D   |
| 7  | CH <sub>3</sub> CN | 85 | 68    |
| 8  | CH <sub>3</sub> CN | 75 | 65    |
| 9  | CH <sub>3</sub> CN | 65 | 71    |
| 10 | CH <sub>3</sub> CN | 55 | 25    |

Reaction conditions: <sup>a</sup> **1a** (0.1 mmol), **2a** (0.2 mmol), Cs<sub>2</sub>CO<sub>3</sub> (0.5 equiv), FeSO<sub>4</sub>·7H<sub>2</sub>O (x equiv), K<sub>2</sub>S<sub>2</sub>O<sub>8</sub> (y equiv), solvent (1 mL), T<sub>1</sub>=65 °C, t<sub>1</sub>= 3 h, T<sub>2</sub>, t<sub>2</sub>. <sup>b</sup> Isolated yield. <sup>c</sup> N.D means not detected.

## 2.2 General procedures for the Synthesis of Substrates and Products

### A) General procedures for the synthesis of indolylquinones

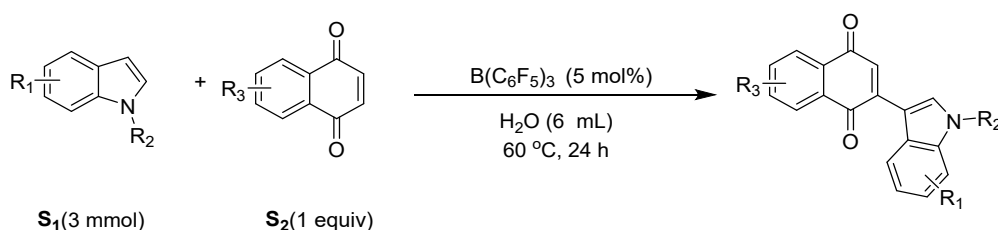

Indol-3-ylquinones (**1a-1u**).<sup>1</sup> Indole (3 mmol), naphthoquinone (3 mmol), (C<sub>6</sub>F<sub>5</sub>)<sub>3</sub>B (77 mg, 5 mol%) were sequentially weighed into the reaction flask, then 6ml of water was added, and the reaction was heated to 60 °C for 24 h in the oil bath. After the reaction was completed, the aqueous phase was extracted three times with ethyl acetate. The organic phase was dried with anhydrous magnesium sulfate. The solvent was evaporated to dryness under reduced pressure, and the product was purified by column chromatography using ethyl acetate/petroleum ether as the eluent to obtain **1a-1u**. If the product is not pure, it can be recrystallized with ethyl acetate.

**B) General procedures for the synthesis of benzo[5,6]indeno[2,1-b]indole-7,12-dione derivatives.**



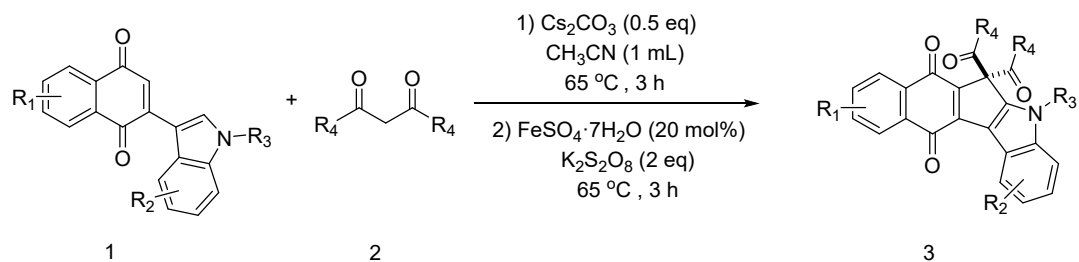

Indolylquinone (0.1 mmol, 1.0 equiv), 1,3-dicarbonyl compound (0.2 mmol, 2.0 equiv), Cs<sub>2</sub>CO<sub>3</sub> (17mg, 0.05 mmol, 0.5 equiv) were sequentially weighed into the reaction flask and immediately dissolve them with 0.5 ml CH<sub>3</sub>CN, and the mixture was heated to 65 °C and stirred for 3 h in the oil bath. Then sequentially add FeSO<sub>4</sub>·7H<sub>2</sub>O (5.6 mg, 0.02 mmol, 0.2 equiv), K<sub>2</sub>S<sub>2</sub>O<sub>8</sub> (54.0 mg, 0.2 mmol, 2 equiv) and stirred for 3 h in the 65 °C oil bath. After the reaction was completed, the solution was diluted with water and extracted three times with EtOAc. The organic phase was dried with anhydrous magnesium sulfate. The solvent was evaporated to dryness under reduced pressure, and the product was purified by column chromatography using ethyl acetate/petroleum ether as the eluent to obtain benzo[5,6]indeno[2,1-*b*]indole-7,12-dione derivatives. If the product is not pure, it can be recrystallized with ethyl acetate and petroleum ether.

## 2.3 Mechanistic experiments

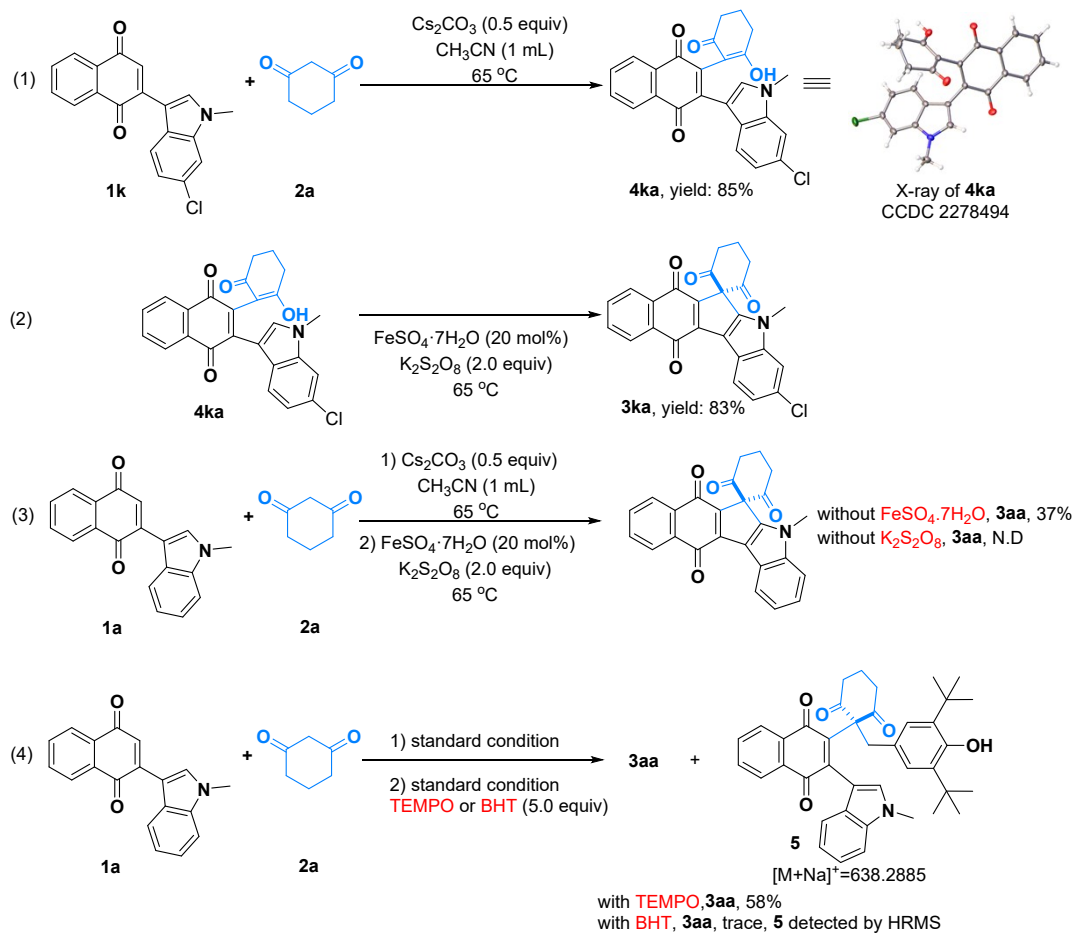

Scheme S1 Mechanistic experiments.

## 2.4 Photophysical properties

The parameters setting for fluorescence emission spectrum: the scanning range of emission wavelength was from 375 nm to 800 nm, excitation wavelength was the  $\lambda_{\text{max}}$  of the UV/VIS spectrum of every compound, emission slit width was 5 nm, excitation slit width was 5 nm, the sensitivity was 1, the scanning speed was medium speed.

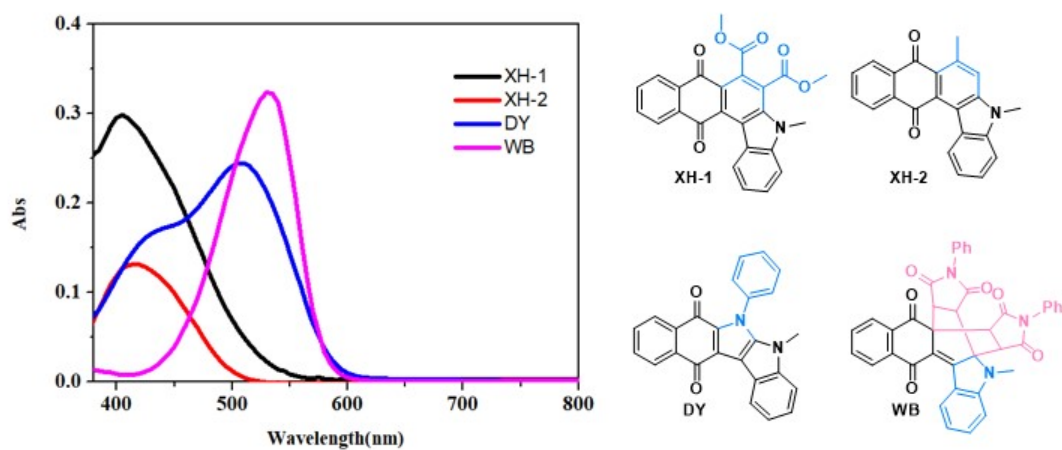

**Figure S1** The UV-VIS spectrum of compound XH-1, XH-2, DY, WB ( $C=2.5 \times 10^{-5}$  M) in DCM

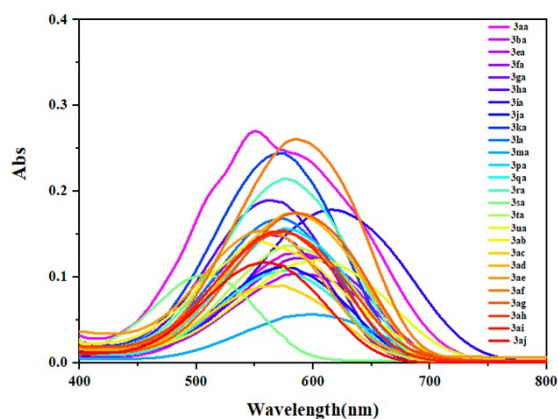

**Figure S2** The UV-VIS spectrum of compound 3aa-3aj ( $C=2.5 \times 10^{-5}$  M) in THF

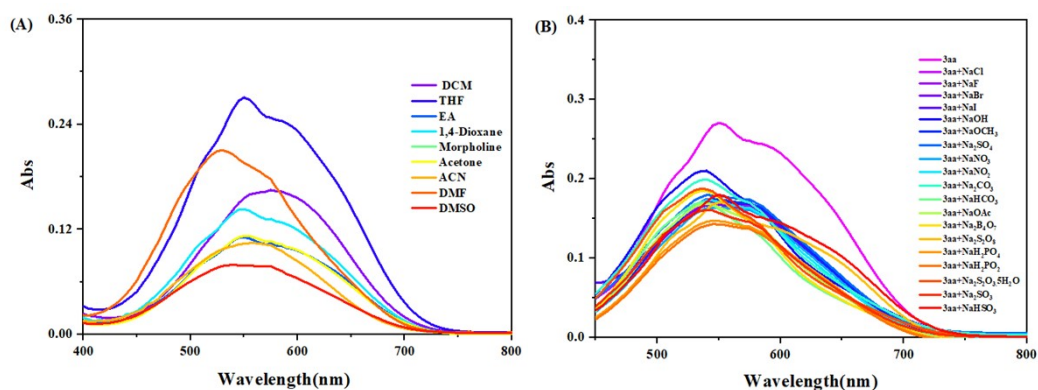

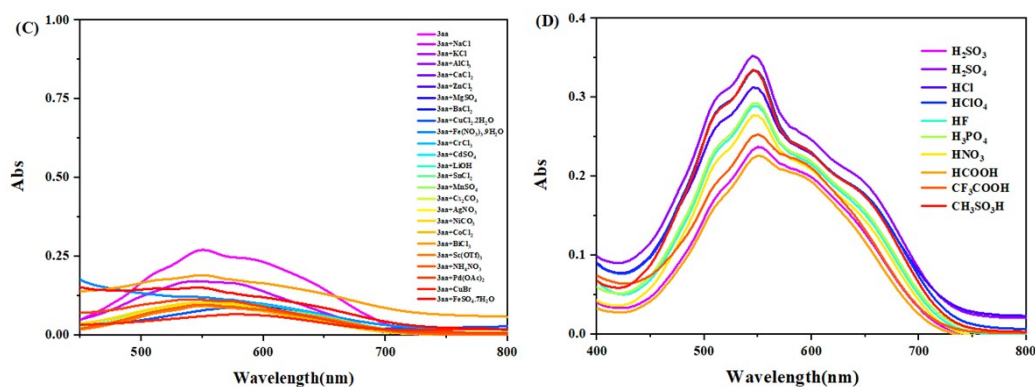

**Figure S3** (A) The UV-VIS spectrum of compound **3aa** ( $C=2.5 \times 10^{-5}$  M) in different solvents. (B) The UV-VIS spectrum of compound **3aa** ( $C=2.5 \times 10^{-5}$  M) with different anionic salts ( $C=5 \times 10^{-4}$  M) in THF. (C) The UV-VIS spectrum of compound **3aa** ( $C=2.5 \times 10^{-5}$  M) with different metal salts ( $C=5 \times 10^{-4}$  M) in THF. (D) The UV-VIS spectrum of compound **3aa** ( $C=2.5 \times 10^{-5}$  M) with different acids ( $C=0.5$  M) in THF.

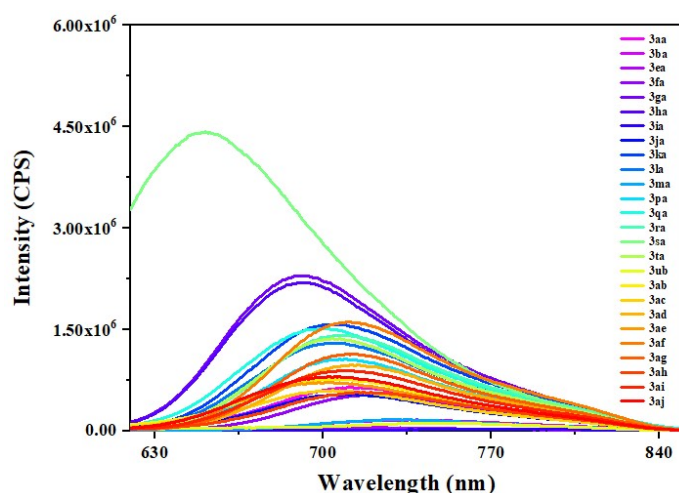

**Figure S4** The fluorescence emission spectrum of compound **3aa-3aj** ( $C=2.5 \times 10^{-5}$  M) in THF

**Table S6** Photophysical characterization data of all compounds

| Entry | compound   | $\lambda_{\max}$ (nm) | $\lambda_{\text{em}}$ (nm) |
|-------|------------|-----------------------|----------------------------|
| 1     | <b>3aa</b> | 550                   | 712                        |
| 2     | <b>3ba</b> | 585                   | 739                        |
| 3     | <b>3ea</b> | 585                   | 717                        |
| 4     | <b>3fa</b> | 595                   | 723                        |
| 5     | <b>3ga</b> | 595                   | 692                        |
| 6     | <b>3ha</b> | 565                   | 691                        |
| 7     | <b>3ia</b> | 615                   | 773                        |

|    |     |     |     |
|----|-----|-----|-----|
| 8  | 3ja | 575 | 710 |
| 9  | 3ka | 575 | 704 |
| 10 | 3la | 575 | 706 |
| 11 | 3ma | 600 | 730 |
| 12 | 3pa | 575 | 709 |
| 13 | 3qa | 575 | 700 |
| 14 | 3ra | 575 | 705 |
| 15 | 3sa | 505 | 653 |
| 16 | 3ta | 580 | 704 |
| 17 | 3ua | 605 | 752 |
| 18 | 3ab | 555 | 707 |
| 19 | 3ac | 575 | 704 |
| 20 | 3ad | 585 | 715 |
| 21 | 3ae | 555 | 704 |
| 22 | 3af | 585 | 710 |
| 23 | 3ag | 585 | 714 |
| 24 | 3ah | 575 | 717 |
| 25 | 3ai | 575 | 712 |
| 26 | 3aj | 560 | 702 |

## 2.5 Preparation of photosensitizers

10  $\mu\text{mol}$  photosensitizer was dissolved in 10 mL dimethyl sulfoxide (DMSO) to prepare a  $10^{-3}$  mol/L solution.

## 2.6 Total ROS detection by indicator DCFH

25  $\mu\text{L}$  2',7'-Dichlorodihydrofluorescein (DCFH,  $4 \times 10^{-5}$  mol/L) as an indicator was added into 10  $\mu\text{L}$  photosensitizers ( $1 \times 10^{-3}$  mol/L) and 965  $\mu\text{L}$  PBS. Control group were prepared by adding 25  $\mu\text{L}$  DCFH into 975  $\mu\text{L}$  PBS. After that, the obtained solutions were exposed to 660 nm laser irradiation ( $500 \text{ mW/cm}^2$ ) for different times, the PL intensities at 521 nm were recorded under excitation at 480 nm.

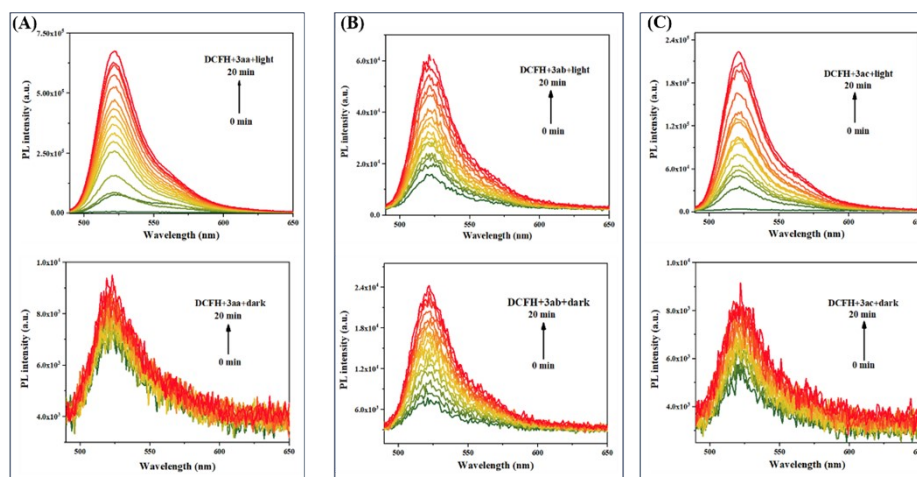

**Figure S5** Fluorescent spectra of **3aa/3ab/3ac**+ DCFH under 660 nm laser irradiation ( $500 \text{ mW/cm}^2$ ) or at dark for 20 min.

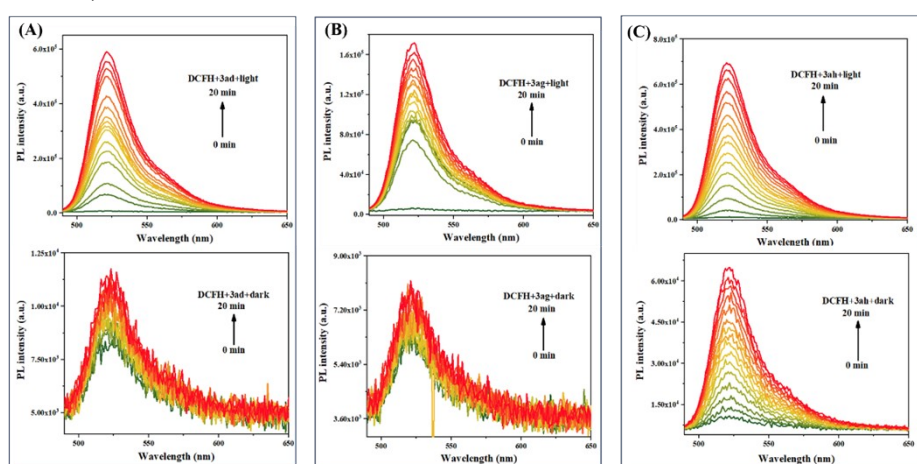

**Figure S6** Fluorescent spectra of **3ad/3ag/3ah**+ DCFH under 660 nm laser irradiation ( $500 \text{ mW/cm}^2$ ) or at dark for 20 min.

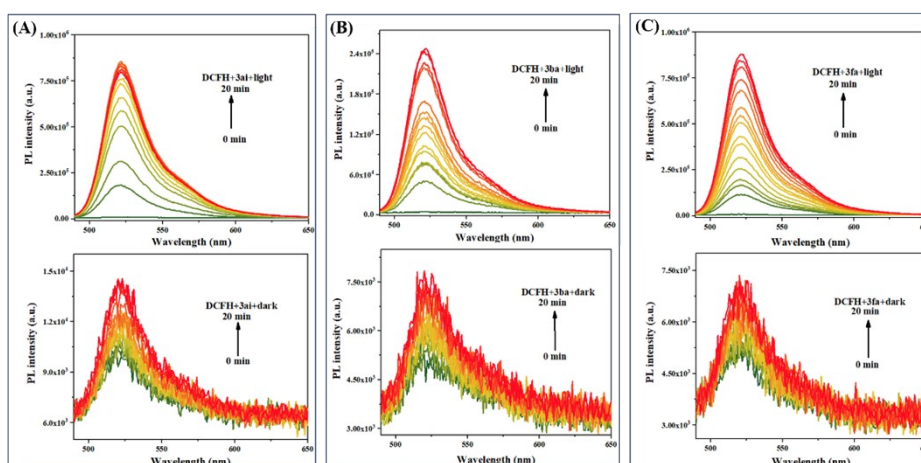

**Figure S7** Fluorescent spectra of **3ai/3ba/3fa**+ DCFH under 660 nm laser irradiation ( $500 \text{ mW/cm}^2$ ) or at dark for 20 min.

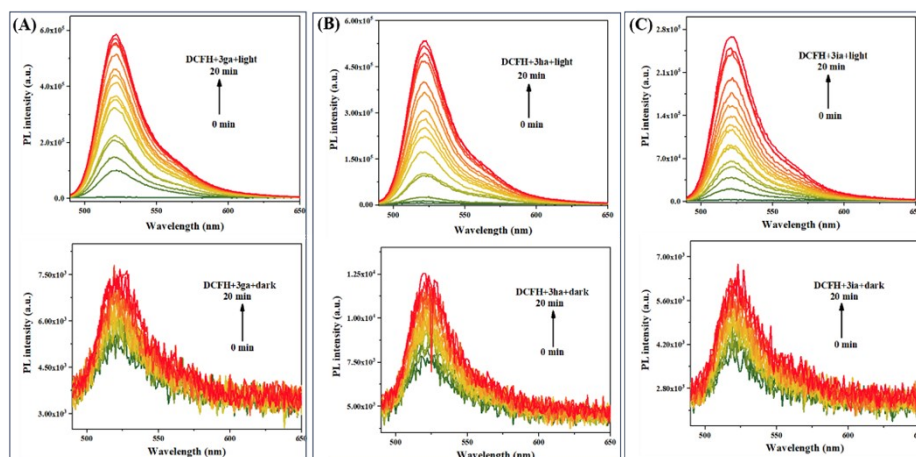

**Figure S8** Fluorescent spectra of **3ga/3ha/3ia**+ DCFH under 660 nm laser irradiation ( $500 \text{ mW/cm}^2$ ) or at dark for 20 min.

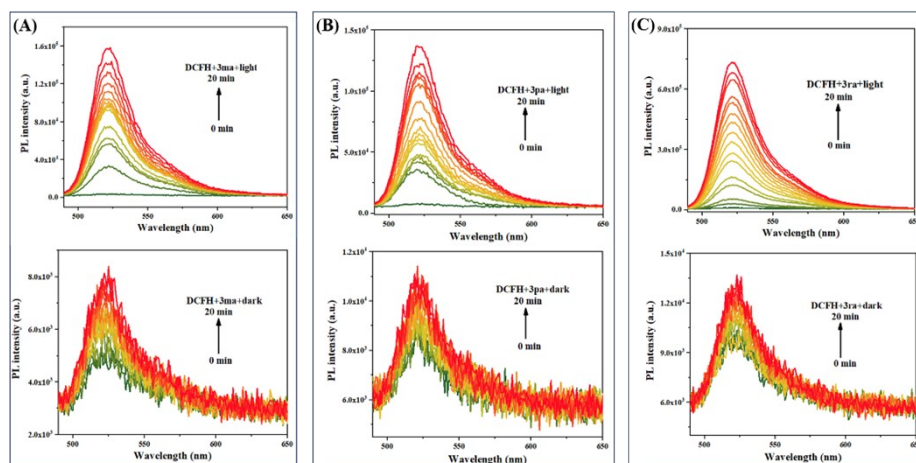

**Figure S9** Fluorescent spectra of **3ma/3pa/3ra**+ DCFH under 660 nm laser irradiation ( $500 \text{ mW/cm}^2$ ) or at dark for 20 min.

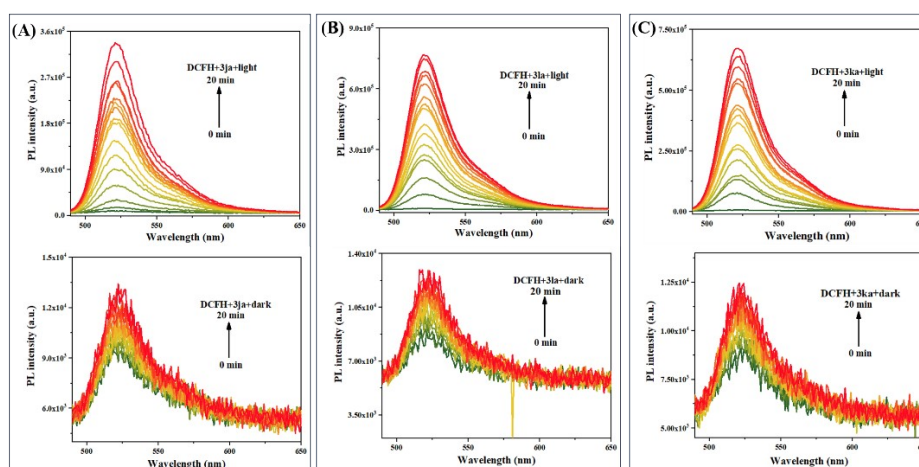

**Figure S10** Fluorescent spectra of **3ja/3la/3ka**+ DCFH under 660 nm laser irradiation ( $500 \text{ mW/cm}^2$ ) or at dark for 20 min.



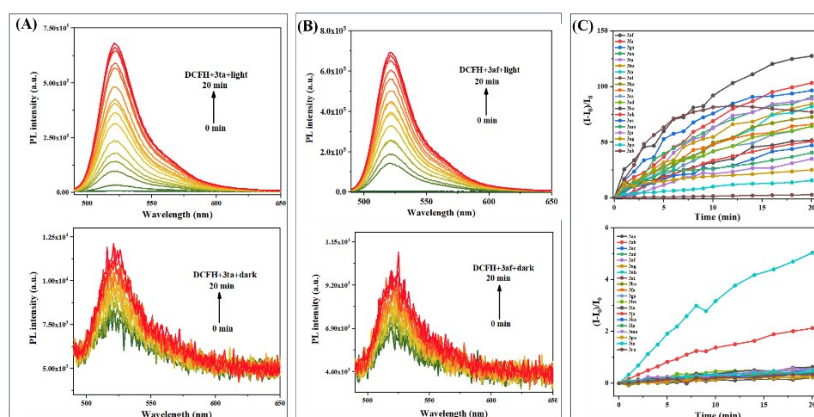

**Figure S11** (A) Fluorescent spectra of **3ta/3af**+ DCFH under 660 nm laser irradiation ( $500 \text{ mW/cm}^2$ ) or at dark for 20 min. (B) Fluorescence intensity net change  $(I-I_0)/I_0$  at 521 nm for the DCFH indicator with **3af** and its series of compounds upon 660 nm irradiation ( $500 \text{ mW/cm}^2$ ) or at dark,  $[\text{DCFH}] = 1.0 \times 10^{-6} \text{ mol/L}$ ,  $[\text{3af}] = 1.0 \times 10^{-5} \text{ mol/L}$ .

## 2.7 Detection of $^1\text{O}_2$ Generation by indicator ABDA

10  $\mu\text{L}$  9,10-anthracenediyl-bis(methylene)-dimalonic acid (ABDA,  $1 \times 10^{-2} \text{ mol/L}$ ) as an indicator was added into 10  $\mu\text{L}$  photosensitizers ( $1 \times 10^{-3} \text{ mol/L}$ ) and 1980  $\mu\text{L}$  PBS. Control group were prepared by adding 10  $\mu\text{L}$  ABDA ( $1 \times 10^{-2} \text{ mol/L}$ ) into 10  $\mu\text{L}$  DMSO and 1980  $\mu\text{L}$  PBS. After that, the obtained solutions were exposed to 660 nm laser irradiation ( $500 \text{ mW/cm}^2$ ) for different times, the absorption spectra of ABDA were measured.

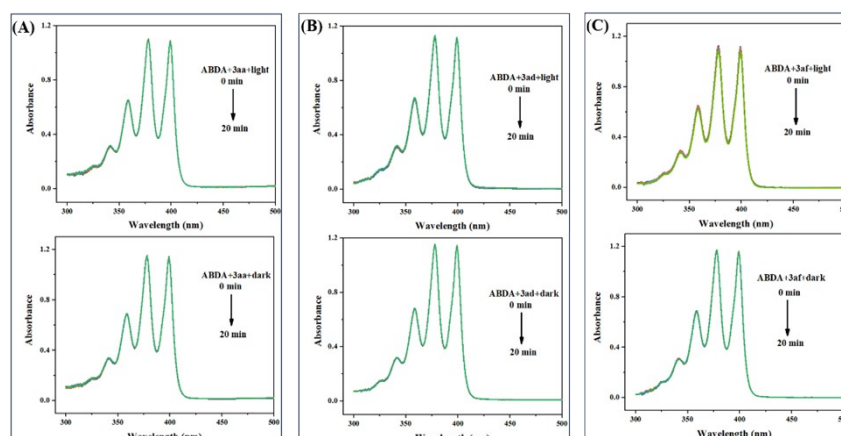

**Figure S12** Absorbance intensity of the ABDA indicator with **3aa/3ad/3af** upon 660 nm laser irradiation ( $500 \text{ mW/cm}^2$ ) or at dark,  $[\text{ABDA}] = 1.0 \times 10^{-4} \text{ mol/L}$ ,  $[\text{3af}] = 1.0 \times 10^{-5} \text{ mol/L}$ .



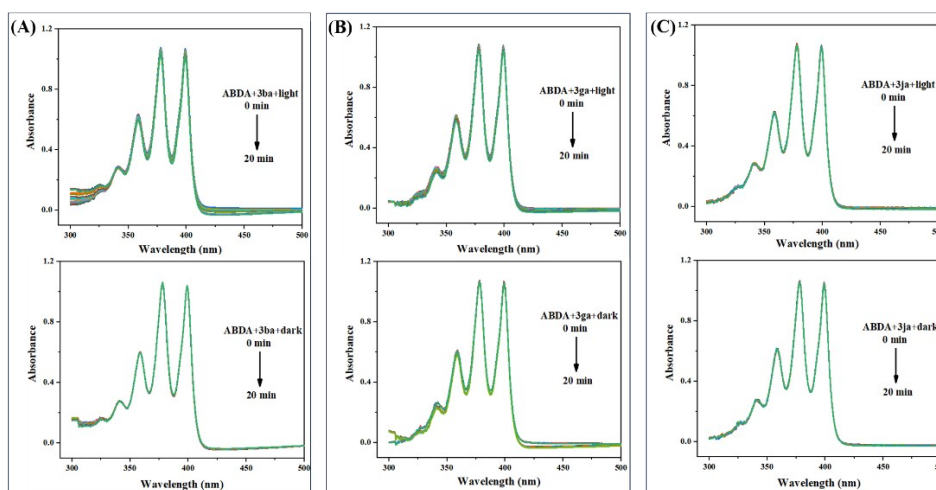

**Figure S13** Absorbance intensity of the ABDA indicator with **3ba/3ga/3ja** upon 660 nm laser irradiation ( $500 \text{ mW/cm}^2$ ) or at dark,  $[\text{ABDA}] = 1.0 \times 10^{-4} \text{ mol/L}$ ,  $[\text{3af}] = 1.0 \times 10^{-5} \text{ mol/L}$ .

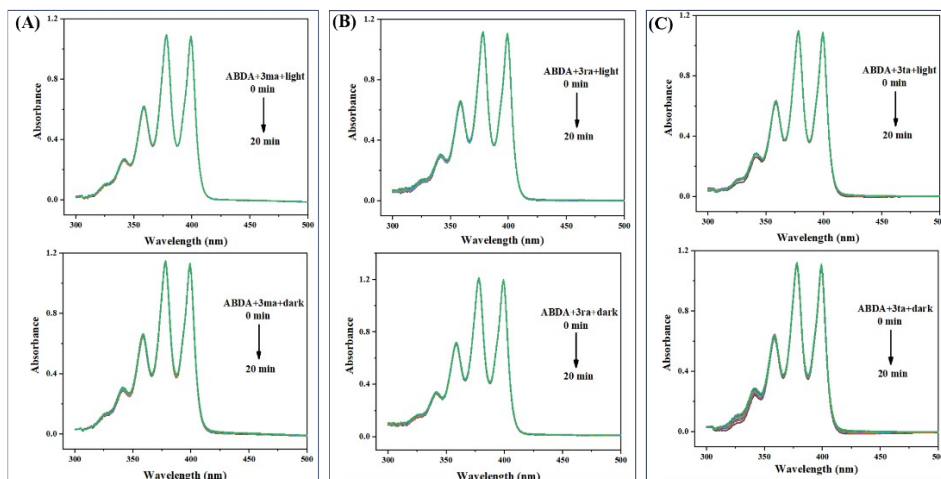

**Figure S14** Absorbance intensity of the ABDA indicator with **3ma/3ra/3ta** upon 660 nm laser irradiation ( $500 \text{ mW/cm}^2$ ) or at dark,  $[\text{ABDA}] = 1.0 \times 10^{-4} \text{ mol/L}$ ,  $[\text{3af}] = 1.0 \times 10^{-5} \text{ mol/L}$ .

## 2.8 EPR Analysis

EPR analysis was carried out to confirm the generation of  $\bullet\text{OH}$  using DMPO as spin-trap agent. The working samples containing  $70.8 \times 10^{-3} \text{ mol/L}$  DMPO and  $1 \times 10^{-3} \text{ mol/L}$  of 3af was injected quantitatively into quartz capillaries, and the spectra of spin was monitored before and after the solution was irradiated by 650 nm laser irradiation.

## 2.9 TD-DFT calculation

Use Gaussian 09 program for TD-DFT calculation. Optimize the ground state molecular configuration using the B3LYP (6-311G (d)) group.

**Table S7** Calculated energy of the singlet (S) and triplet (T) excited states  
(Gaussian/B3LYP/6-311G(d)).

|            |        | 1      | 2      | 3      | 4      | 5      |
|------------|--------|--------|--------|--------|--------|--------|
| <b>3af</b> | S (eV) | 1.7999 | 2.4876 | 2.6655 | 2.7685 | 3.1369 |
|            | T (eV) | 0.9986 | 2.0903 | 2.1948 | 2.6442 | 2.7079 |

## 2.10 Electrochemical Experiments

Cyclic voltammogram of *p*-BQ and **3af** in DCM by argon bubbling with 0.1 M (n-Bu)<sub>4</sub>N<sup>+</sup>PF<sub>6</sub><sup>-</sup> as the supporting electrolyte, Ag/Ag<sup>+</sup> as the reference electrode, a glassy-carbon electrode as the working electrode and a Pt wire as the counter electrode; scan rate, 50 mV s<sup>-1</sup>.

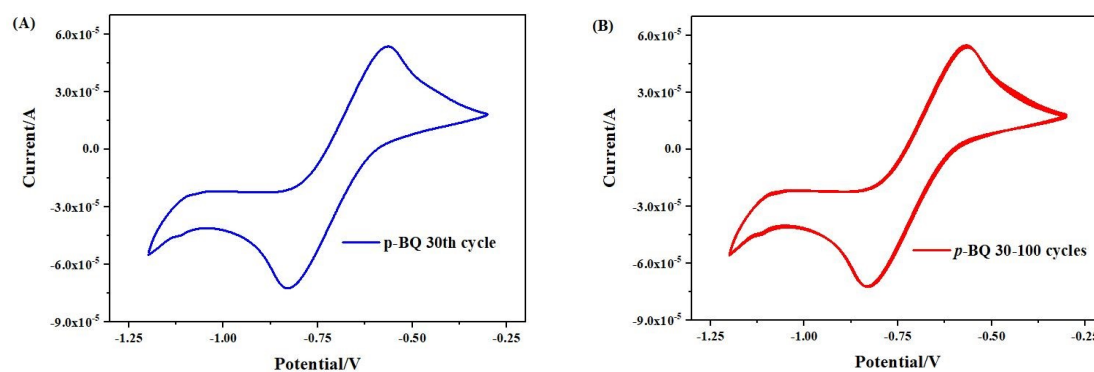

**Figure S15** (A) The 30<sup>th</sup> cycle and (B) the 30-100 cycles of cyclic voltammograms of *p*-benzoquinone(*p*-BQ).

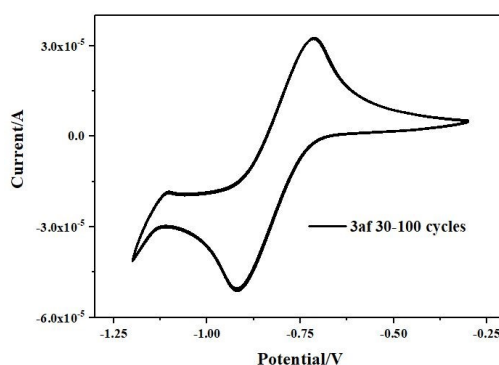

**Figure S16** The 30-100 cycles of cyclic voltammograms of **3af**.

## 2.11 Cell Culture

4T1 cell line was purchased from Chinese Academy of Science Cell Bank for Type Culture Collection, and grown in 1640 culture medium containing 10% FBS and 1% antibiotics (penicillin-streptomycin) at 37 °C in a humidified environment of 5% CO<sub>2</sub>.

## 2.12 In Vitro Cytotoxicity

4T1 cells were seeded in 96-well plates at a density of  $5 \times 10^3$  cells/well and incubated for 24 h. Then the cells were incubated with different concentrations of **3af** in fresh medium. The cells were exposed to 660 nm laser irradiation (500 mW/cm<sup>2</sup>) for 10 min after 12 h incubation. At the same time, the **3af** incubated cells without laser irradiation were also conducted for the dark cytotoxicity study. After further incubation for 24 h, the medium was removed and washed with PBS for three times. Cells were then incubated with fresh serum-free medium containing 10% MTT for 4 h in the dark. Then, all the media were removed and 150  $\mu$ L dimethyl sulfoxide (DMSO) was added. Finally, the absorbance of the products was measured at a wavelength of 570 nm by a microplate reader. The results were expressed as the viable percentage of cells after different treatments relative to the control cells without any treatment. The following steps of MTT test were the same as the above procedures.

## 2.13 Live/Dead Cell Staining

First, 4T1 cells were seeded and cultured in glass bottom dish for 24 h, then exposed to different following treatments: 1) Blank; 2) irradiated 660 nm laser irradiation (500 mW/cm<sup>2</sup>) for 10 min; 3) incubated with **3af** for 24 h; 4) incubated with **3af** for 24 h and irradiated with 660 nm laser irradiation (500 mW/cm<sup>2</sup>) for 10 min. After different treatments, the cells were incubated at 37 °C for another 24 h, then successively stained with PI and FDA in PBS for 10 min. Subsequently, the cells were gently washed and

then imaged by CLSM. Conditions: excitation wavelength: 488 nm for FDA and 543 nm for PI; emission filter: 500-550 nm for FDA and 550–650 nm for PI.

## **2.14 Intracellular ROS Generation**

4T1 cells were primarily seeded and cultured in glass bottom dish for 24 h. The original culture medium was then replaced with 1 mL of fresh one with or without **3af**, followed by incubation of 12 h. Then the cells were washed with PBS for three times, and incubated with 1 mL fresh FBS-free medium containing 10 mM DCFH-DA for another 20 min. The **3af** loaded cells were subsequently irradiated using a 660 nm laser (500 mW/cm<sup>2</sup>) for 10 min. After further incubation at 37 °C, the cells were imaged by CLSM with the excitation at 488 nm and emission was collected from 500-550 nm.

### 3. X-Ray Crystallographic Data

#### 3.1 X-Ray Crystallographic Data of 3aa

Single crystals of  $C_{25}H_{17}NO_4$  **3aa** were grown from ethyl acetate and PE. The ellipsoids are shown at 50% probability levels. A suitable crystal was selected and collected at 170.00 (10) K on a SuperNova, Dual, Cu at zero, AtlasS2 diffractometer. The data were collected and processed using CrysAlisPro. The structures were solved by direct methods using Olex2 software with the SHELXT structure solution program via intrinsic phasing algorithm, and the non-hydrogen atoms were located from the trial structure and then refined anisotropically with SHELXL-2018 using a full-matrix least squares procedure based on  $F^2$ . The weighted  $R$  factor,  $wR$  and goodness-of-fit  $S$  values were obtained based on  $F^2$ . The hydrogen atom positions were fixed geometrically at the calculated distances and allowed to ride on their parent atoms. Crystallographic data for the structure reported in this paper have been deposited at the Cambridge Crystallographic Data Center and allocated with the deposition numbers: CCDC 2277737 for compound **3aa**.

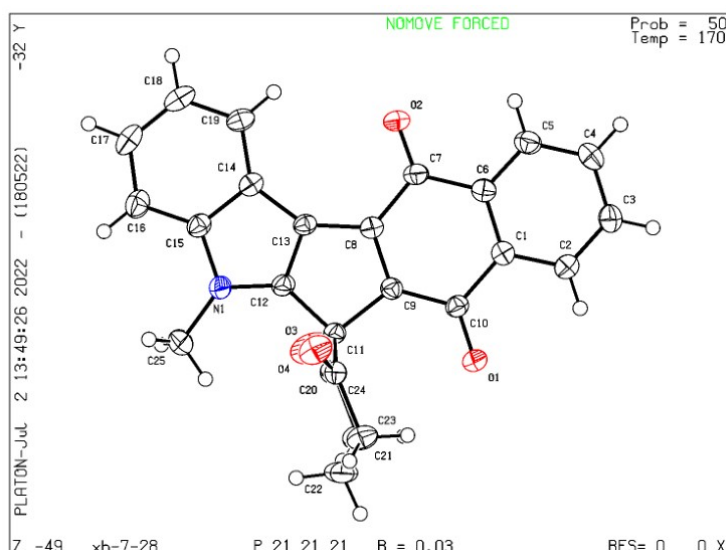

**Figure S17** ORTEP Drawing of **3aa** (The ellipsoids are shown at 50% probability levels)

**Table S8** Crystal data and structure refinement for **3aa**.

|                                             |                                                               |
|---------------------------------------------|---------------------------------------------------------------|
| Identification code                         | 3aa                                                           |
| Empirical formula                           | C <sub>25</sub> H <sub>17</sub> NO <sub>4</sub>               |
| Formula weight                              | 395.39                                                        |
| Temperature/K                               | 170.00(10)                                                    |
| Crystal system                              | orthorhombic                                                  |
| Space group                                 | P2 <sub>1</sub> 2 <sub>1</sub> 2 <sub>1</sub>                 |
| a/Å                                         | 9.62350(10)                                                   |
| b/Å                                         | 11.7760(2)                                                    |
| c/Å                                         | 16.9508(3)                                                    |
| α/°                                         | 90                                                            |
| β/°                                         | 90                                                            |
| γ/°                                         | 90                                                            |
| Volume/Å <sup>3</sup>                       | 1920.97(5)                                                    |
| Z                                           | 4                                                             |
| ρ <sub>calc</sub> /cm <sup>3</sup>          | 1.367                                                         |
| μ/mm <sup>-1</sup>                          | 0.760                                                         |
| F(000)                                      | 824.0                                                         |
| Crystal size/mm <sup>3</sup>                | 0.15 × 0.12 × 0.09                                            |
| Radiation                                   | Cu Kα (λ = 1.54184)                                           |
| 2θ range for data collection/°              | 9.144 to 143.204                                              |
| Index ranges                                | -11 ≤ h ≤ 8, -14 ≤ k ≤ 9, -20 ≤ l ≤ 18                        |
| Reflections collected                       | 6335                                                          |
| Independent reflections                     | 3418 [R <sub>int</sub> = 0.0115, R <sub>sigma</sub> = 0.0143] |
| Data/restraints/parameters                  | 3418/0/272                                                    |
| Goodness-of-fit on F <sup>2</sup>           | 1.029                                                         |
| Final R indexes [I ≥ 2σ (I)]                | R <sub>1</sub> = 0.0314, wR <sub>2</sub> = 0.0828             |
| Final R indexes [all data]                  | R <sub>1</sub> = 0.0324, wR <sub>2</sub> = 0.0837             |
| Largest diff. peak/hole / e Å <sup>-3</sup> | 0.12/-0.21                                                    |
| Flack parameter                             | -0.04(12)                                                     |

### Crystal structure determination of 3aa

**Crystal Data** for C<sub>25</sub>H<sub>17</sub>NO<sub>4</sub> (*M* = 395.39 g/mol): orthorhombic, space group P2<sub>1</sub>2<sub>1</sub>2<sub>1</sub> (no. 19), *a* = 9.62350(10) Å, *b* = 11.7760(2) Å, *c* = 16.9508(3) Å, *V* = 1920.97(5) Å<sup>3</sup>, *Z* = 4, *T* = 170.00(10) K, μ(Cu Kα) = 0.760 mm<sup>-1</sup>, *D*<sub>calc</sub> = 1.367 g/cm<sup>3</sup>, 6335 reflections measured (9.144° ≤ 2θ ≤ 143.204°), 3418 unique (*R*<sub>int</sub> = 0.0115, *R*<sub>sigma</sub> = 0.0143) which were used in all calculations. The final *R*<sub>1</sub> was 0.0314 (*I* > 2σ(*I*)) and *wR*<sub>2</sub> was 0.0837 (all data).

**Table S9 Fractional Atomic Coordinates (×10<sup>4</sup>) and Equivalent Isotropic Displacement Parameters (Å<sup>2</sup>×10<sup>3</sup>) for 3aa.** U<sub>eq</sub> is defined as 1/3 of the trace of the orthogonalised U<sub>ij</sub> tensor.

| Atom | x          | y           | z          | U(eq)   |
|------|------------|-------------|------------|---------|
| O1   | 5363.4(15) | 2781.3(11)  | 6373.6(9)  | 36.7(3) |
| O2   | 7740.7(15) | 6717.6(12)  | 7264.3(10) | 40.8(4) |
| O3   | 2181.2(15) | 5078.6(13)  | 6958.5(9)  | 40.3(4) |
| O4   | 4701(2)    | 5135.8(16)  | 4632.5(9)  | 58.2(5) |
| N1   | 3143.7(17) | 7123.0(13)  | 5696.5(9)  | 27.6(3) |
| C1   | 7196.4(18) | 3682.0(16)  | 7069.0(10) | 24.5(4) |
| C2   | 7792(2)    | 2652.2(16)  | 7286.8(11) | 27.9(4) |
| C3   | 9016(2)    | 2634.6(17)  | 7722.9(11) | 31.7(4) |
| C4   | 9642.3(19) | 3641.4(18)  | 7952.8(12) | 33.5(4) |
| C5   | 9051(2)    | 4669.2(17)  | 7749.9(11) | 31.0(4) |
| C6   | 7834.9(19) | 4698.7(16)  | 7308.7(10) | 25.6(4) |
| C7   | 7211.2(19) | 5812.7(16)  | 7097.1(11) | 26.7(4) |
| C8   | 5880.4(18) | 5776.5(15)  | 6657.8(10) | 22.1(3) |
| C9   | 5282.2(17) | 4776.0(15)  | 6424.8(10) | 22.8(3) |
| C10  | 5879.8(19) | 3673.0(15)  | 6598.4(10) | 24.6(4) |
| C11  | 3924.7(18) | 5017.4(14)  | 5963.0(10) | 23.5(4) |
| C12  | 3950.3(19) | 6293.8(15)  | 5992.5(10) | 24.6(4) |
| C13  | 5068.0(18) | 6723.1(15)  | 6397.9(10) | 23.0(3) |
| C14  | 4973.7(19) | 7938.6(15)  | 6357.2(10) | 24.2(4) |
| C15  | 3763(2)    | 8157.0(15)  | 5907.5(10) | 26.7(4) |
| C16  | 3327(2)    | 9252.4(17)  | 5719.2(11) | 33.3(4) |
| C17  | 4139(2)    | 10137.0(16) | 5994.2(12) | 36.2(5) |
| C18  | 5331(2)    | 9942.6(16)  | 6441.2(12) | 34.0(4) |
| C19  | 5759(2)    | 8854.4(15)  | 6628.3(11) | 28.1(4) |
| C20  | 4080(2)    | 4569.2(16)  | 5104.8(11) | 29.9(4) |
| C21  | 3449(2)    | 3443.7(18)  | 4905.9(12) | 38.5(5) |
| C22  | 2040(2)    | 3263(2)     | 5293.2(13) | 43.0(5) |
| C23  | 2116(2)    | 3389.3(17)  | 6182.4(13) | 36.9(5) |
| C24  | 2664.7(19) | 4530.1(15)  | 6423.6(11) | 25.7(4) |
| C25  | 1906(3)    | 7008.8(18)  | 5216.9(14) | 44.8(6) |

**Table S10 Anisotropic Displacement Parameters ( $\text{\AA}^2 \times 10^3$ ) for 3aa. The Anisotropic displacement factor exponent takes the form: -  $2\pi^2[h^2a^{*2}U_{11}+2hka^*b^*U_{12}+\dots]$ .**

| Atom | U <sub>11</sub> | U <sub>22</sub> | U <sub>33</sub> | U <sub>23</sub> | U <sub>13</sub> | U <sub>12</sub> |
|------|-----------------|-----------------|-----------------|-----------------|-----------------|-----------------|
| O1   | 41.5(8)         | 22.1(6)         | 46.5(8)         | -3.5(6)         | -16.1(7)        | -1.2(6)         |
| O2   | 33.9(7)         | 25.5(6)         | 63.1(10)        | -5.2(7)         | -15.2(7)        | -5.6(6)         |
| O3   | 42.2(8)         | 37.1(8)         | 41.7(8)         | -7.3(7)         | 13.2(7)         | -4.0(7)         |

**Table S10 Anisotropic Displacement Parameters ( $\text{\AA}^2 \times 10^3$ ) for 3aa. The Anisotropic displacement factor exponent takes the form: -  $2\pi^2[h^2a^{*2}U_{11}+2hka^*b^*U_{12}+\dots]$ .**

| Atom | $U_{11}$ | $U_{22}$ | $U_{33}$ | $U_{23}$ | $U_{13}$  | $U_{12}$  |
|------|----------|----------|----------|----------|-----------|-----------|
| O4   | 85.4(13) | 58.9(11) | 30.4(7)  | -3.6(7)  | 15.7(8)   | -28.4(11) |
| N1   | 33.4(8)  | 22.8(7)  | 26.5(7)  | 2.1(6)   | -7.0(6)   | -0.7(6)   |
| C1   | 24.3(8)  | 26.7(8)  | 22.6(8)  | -0.2(7)  | 2.3(7)    | 0.5(7)    |
| C2   | 30.5(9)  | 25.6(8)  | 27.8(9)  | -0.5(7)  | 1.8(8)    | -0.1(8)   |
| C3   | 28.7(9)  | 32.7(9)  | 33.6(10) | 2.0(8)   | 1.4(8)    | 5.6(8)    |
| C4   | 24.2(9)  | 41.9(10) | 34.4(10) | 0.2(9)   | -4.1(8)   | 3.1(8)    |
| C5   | 25.7(9)  | 32.7(9)  | 34.5(9)  | -2.4(8)  | -1.9(8)   | -4.0(8)   |
| C6   | 24.0(8)  | 27.7(9)  | 25.0(8)  | -0.6(7)  | 1.9(7)    | -1.6(7)   |
| C7   | 25.5(8)  | 25.1(8)  | 29.5(9)  | -2.8(7)  | -0.3(8)   | -4.0(8)   |
| C8   | 23.9(8)  | 23.2(8)  | 19.3(7)  | 0.2(6)   | 2.7(7)    | -2.3(7)   |
| C9   | 24.1(8)  | 23.5(8)  | 20.8(7)  | 0.4(7)   | -1.6(7)   | -1.1(7)   |
| C10  | 28.2(8)  | 21.8(8)  | 23.8(8)  | -1.5(7)  | -0.6(7)   | -1.2(7)   |
| C11  | 26.9(8)  | 21.4(8)  | 22.1(8)  | 0.7(6)   | -3.9(7)   | -2.1(7)   |
| C12  | 29.9(8)  | 21.7(8)  | 22.2(8)  | 2.3(6)   | -2.6(7)   | -3.9(7)   |
| C13  | 26.2(8)  | 22.2(8)  | 20.6(7)  | 0.0(7)   | 0.6(7)    | -3.4(7)   |
| C14  | 29.6(8)  | 22.8(8)  | 20.3(8)  | -0.1(6)  | 4.4(7)    | -2.2(7)   |
| C15  | 33.9(9)  | 23.3(9)  | 22.9(8)  | 0.7(7)   | 0.7(7)    | -1.8(7)   |
| C16  | 41.7(11) | 26.8(9)  | 31.5(9)  | 4.4(8)   | -0.3(9)   | 2.9(9)    |
| C17  | 49.9(12) | 20.3(9)  | 38.5(10) | 2.3(8)   | 8.8(9)    | 2.0(9)    |
| C18  | 43.7(11) | 22.6(9)  | 35.6(9)  | -4.9(8)  | 10.5(9)   | -8.1(8)   |
| C19  | 32.4(9)  | 26.5(9)  | 25.5(8)  | -4.2(7)  | 5.7(7)    | -5.8(8)   |
| C20  | 34.6(10) | 31.6(9)  | 23.5(8)  | -0.5(7)  | -2.1(8)   | -3.2(8)   |
| C21  | 51.3(12) | 37.0(11) | 27.3(9)  | -9.5(8)  | -3.4(9)   | -7.0(10)  |
| C22  | 42.5(11) | 41.0(11) | 45.4(12) | -8.1(10) | -11.3(9)  | -13.9(10) |
| C23  | 36.4(10) | 31.7(10) | 42.7(11) | -1.5(8)  | 4.2(9)    | -10.9(9)  |
| C24  | 26.7(8)  | 23.6(8)  | 26.8(8)  | 2.6(7)   | -3.2(7)   | 0.1(7)    |
| C25  | 51.7(13) | 33.1(11) | 49.6(12) | -1.9(9)  | -28.5(11) | 3.1(10)   |

**Table S11 Bond Lengths for 3aa.**

| Atom | Atom | Length/ $\text{\AA}$ | Atom | Atom | Length/ $\text{\AA}$ |
|------|------|----------------------|------|------|----------------------|
| O1   | C10  | 1.223(2)             | C9   | C10  | 1.451(2)             |
| O2   | C7   | 1.215(2)             | C9   | C11  | 1.549(2)             |
| O3   | C24  | 1.207(2)             | C11  | C12  | 1.504(2)             |
| O4   | C20  | 1.201(3)             | C11  | C20  | 1.555(2)             |
| N1   | C12  | 1.345(2)             | C11  | C24  | 1.552(2)             |



**Table S11 Bond Lengths for 3aa.**

| Atom | Atom | Length/Å | Atom | Atom | Length/Å |
|------|------|----------|------|------|----------|
| N1   | C15  | 1.402(2) | C12  | C13  | 1.373(2) |
| N1   | C25  | 1.448(3) | C13  | C14  | 1.436(2) |
| C1   | C2   | 1.391(3) | C14  | C15  | 1.416(3) |
| C1   | C6   | 1.406(3) | C14  | C19  | 1.395(2) |
| C1   | C10  | 1.497(2) | C15  | C16  | 1.393(3) |
| C2   | C3   | 1.391(3) | C16  | C17  | 1.383(3) |
| C3   | C4   | 1.386(3) | C17  | C18  | 1.394(3) |
| C4   | C5   | 1.381(3) | C18  | C19  | 1.383(3) |
| C5   | C6   | 1.389(3) | C20  | C21  | 1.497(3) |
| C6   | C7   | 1.486(3) | C21  | C22  | 1.521(3) |
| C7   | C8   | 1.482(2) | C22  | C23  | 1.517(3) |
| C8   | C9   | 1.369(2) | C23  | C24  | 1.500(2) |
| C8   | C13  | 1.431(2) |      |      |          |

**Table S12 Bond Angles for 3aa.**

| Atom | Atom | Atom | Angle/°    | Atom | Atom | Atom | Angle/°    |
|------|------|------|------------|------|------|------|------------|
| C12  | N1   | C15  | 106.87(15) | C12  | C11  | C20  | 111.64(14) |
| C12  | N1   | C25  | 128.08(16) | C12  | C11  | C24  | 111.44(15) |
| C15  | N1   | C25  | 124.99(16) | C24  | C11  | C20  | 114.86(14) |
| C2   | C1   | C6   | 119.05(16) | N1   | C12  | C11  | 134.74(17) |
| C2   | C1   | C10  | 118.94(16) | N1   | C12  | C13  | 111.82(16) |
| C6   | C1   | C10  | 122.00(16) | C13  | C12  | C11  | 113.42(16) |
| C3   | C2   | C1   | 120.20(17) | C8   | C13  | C14  | 145.68(17) |
| C4   | C3   | C2   | 120.34(18) | C12  | C13  | C8   | 107.17(15) |
| C5   | C4   | C3   | 120.02(17) | C12  | C13  | C14  | 107.07(16) |
| C4   | C5   | C6   | 120.21(18) | C15  | C14  | C13  | 105.01(15) |
| C1   | C6   | C7   | 120.35(15) | C19  | C14  | C13  | 136.11(18) |
| C5   | C6   | C1   | 120.17(17) | C19  | C14  | C15  | 118.87(17) |
| C5   | C6   | C7   | 119.48(16) | N1   | C15  | C14  | 109.23(15) |
| O2   | C7   | C6   | 123.26(16) | C16  | C15  | N1   | 128.16(17) |
| O2   | C7   | C8   | 120.33(17) | C16  | C15  | C14  | 122.61(17) |
| C8   | C7   | C6   | 116.41(15) | C17  | C16  | C15  | 116.77(19) |
| C9   | C8   | C7   | 122.20(16) | C16  | C17  | C18  | 121.63(18) |
| C9   | C8   | C13  | 110.59(15) | C19  | C18  | C17  | 121.45(18) |
| C13  | C8   | C7   | 127.18(16) | C18  | C19  | C14  | 118.68(18) |
| C8   | C9   | C10  | 123.03(15) | O4   | C20  | C11  | 118.88(17) |
| C8   | C9   | C11  | 110.02(14) | O4   | C20  | C21  | 122.94(18) |

**Table S12 Bond Angles for 3aa.**

| Atom | Atom | Atom | Angle/°    | Atom | Atom | Atom | Angle/°    |
|------|------|------|------------|------|------|------|------------|
| C10  | C9   | C11  | 126.95(15) | C21  | C20  | C11  | 118.18(16) |
| O1   | C10  | C1   | 121.07(16) | C20  | C21  | C22  | 112.90(18) |
| O1   | C10  | C9   | 122.99(16) | C23  | C22  | C21  | 111.83(18) |
| C9   | C10  | C1   | 115.93(15) | C24  | C23  | C22  | 112.09(17) |
| C9   | C11  | C20  | 109.22(14) | O3   | C24  | C11  | 118.77(16) |
| C9   | C11  | C24  | 109.68(13) | O3   | C24  | C23  | 123.27(18) |
| C12  | C11  | C9   | 98.79(13)  | C23  | C24  | C11  | 117.96(16) |

**Table S13 Torsion Angles for 3aa.**

| A  | B   | C   | D   | Angle/°     | A   | B   | C   | D   | Angle/°     |
|----|-----|-----|-----|-------------|-----|-----|-----|-----|-------------|
| O2 | C7  | C8  | C9  | 176.82(18)  | C10 | C9  | C11 | C12 | -179.03(16) |
| O2 | C7  | C8  | C13 | -1.2(3)     | C10 | C9  | C11 | C20 | -62.3(2)    |
| O4 | C20 | C21 | C22 | -140.5(2)   | C10 | C9  | C11 | C24 | 64.3(2)     |
| N1 | C12 | C13 | C8  | -177.70(14) | C11 | C9  | C10 | O1  | 1.6(3)      |
| N1 | C12 | C13 | C14 | -0.2(2)     | C11 | C9  | C10 | C1  | -179.05(15) |
| N1 | C15 | C16 | C17 | -179.23(18) | C11 | C12 | C13 | C8  | 0.9(2)      |
| C1 | C2  | C3  | C4  | 0.8(3)      | C11 | C12 | C13 | C14 | 178.42(15)  |
| C1 | C6  | C7  | O2  | -177.40(19) | C11 | C20 | C21 | C22 | 39.6(3)     |
| C1 | C6  | C7  | C8  | 2.4(2)      | C12 | N1  | C15 | C14 | -0.94(19)   |
| C2 | C1  | C6  | C5  | 0.6(3)      | C12 | N1  | C15 | C16 | 178.33(19)  |
| C2 | C1  | C6  | C7  | -178.96(17) | C12 | C11 | C20 | O4  | 27.9(3)     |
| C2 | C1  | C10 | O1  | -3.5(3)     | C12 | C11 | C20 | C21 | -152.22(17) |
| C2 | C1  | C10 | C9  | 177.15(16)  | C12 | C11 | C24 | O3  | -26.6(2)    |
| C2 | C3  | C4  | C5  | 0.1(3)      | C12 | C11 | C24 | C23 | 153.90(16)  |
| C3 | C4  | C5  | C6  | -0.6(3)     | C12 | C13 | C14 | C15 | -0.42(19)   |
| C4 | C5  | C6  | C1  | 0.3(3)      | C12 | C13 | C14 | C19 | -179.10(19) |
| C4 | C5  | C6  | C7  | 179.87(17)  | C13 | C8  | C9  | C10 | 179.48(16)  |
| C5 | C6  | C7  | O2  | 3.0(3)      | C13 | C8  | C9  | C11 | -0.31(19)   |
| C5 | C6  | C7  | C8  | -177.25(15) | C13 | C14 | C15 | N1  | 0.83(19)    |
| C6 | C1  | C2  | C3  | -1.2(3)     | C13 | C14 | C15 | C16 | -178.49(18) |
| C6 | C1  | C10 | O1  | 177.63(17)  | C13 | C14 | C19 | C18 | 178.0(2)    |
| C6 | C1  | C10 | C9  | -1.7(2)     | C14 | C15 | C16 | C17 | 0.0(3)      |
| C6 | C7  | C8  | C9  | -2.9(2)     | C15 | N1  | C12 | C11 | -177.48(19) |
| C6 | C7  | C8  | C13 | 179.03(16)  | C15 | N1  | C12 | C13 | 0.7(2)      |
| C7 | C8  | C9  | C10 | 1.2(3)      | C15 | C14 | C19 | C18 | -0.6(2)     |
| C7 | C8  | C9  | C11 | -178.63(15) | C15 | C16 | C17 | C18 | -0.3(3)     |
| C7 | C8  | C13 | C12 | 177.88(16)  | C16 | C17 | C18 | C19 | 0.2(3)      |

**Table S13 Torsion Angles for 3aa.**

| A   | B   | C   | D   | Angle/°     | A   | B   | C   | D   | Angle/°     |
|-----|-----|-----|-----|-------------|-----|-----|-----|-----|-------------|
| C7  | C8  | C13 | C14 | 2.1(4)      | C17 | C18 | C19 | C14 | 0.3(3)      |
| C8  | C9  | C10 | O1  | -178.15(18) | C19 | C14 | C15 | N1  | 179.79(15)  |
| C8  | C9  | C10 | C1  | 1.2(2)      | C19 | C14 | C15 | C16 | 0.5(3)      |
| C8  | C9  | C11 | C12 | 0.75(17)    | C20 | C11 | C12 | N1  | 62.3(3)     |
| C8  | C9  | C11 | C20 | 117.44(16)  | C20 | C11 | C12 | C13 | -115.81(17) |
| C8  | C9  | C11 | C24 | -115.87(15) | C20 | C11 | C24 | O3  | -154.81(17) |
| C8  | C13 | C14 | C15 | 175.4(2)    | C20 | C11 | C24 | C23 | 25.7(2)     |
| C8  | C13 | C14 | C19 | -3.3(4)     | C20 | C21 | C22 | C23 | -56.2(3)    |
| C9  | C8  | C13 | C12 | -0.33(19)   | C21 | C22 | C23 | C24 | 57.6(3)     |
| C9  | C8  | C13 | C14 | -176.2(2)   | C22 | C23 | C24 | O3  | 137.9(2)    |
| C9  | C11 | C12 | N1  | 177.15(19)  | C22 | C23 | C24 | C11 | -42.6(2)    |
| C9  | C11 | C12 | C13 | -0.99(19)   | C24 | C11 | C12 | N1  | -67.6(3)    |
| C9  | C11 | C20 | O4  | -80.3(2)    | C24 | C11 | C12 | C13 | 114.27(17)  |
| C9  | C11 | C20 | C21 | 99.6(2)     | C24 | C11 | C20 | O4  | 156.03(19)  |
| C9  | C11 | C24 | O3  | 81.8(2)     | C24 | C11 | C20 | C21 | -24.1(2)    |
| C9  | C11 | C24 | C23 | -97.75(18)  | C25 | N1  | C12 | C11 | -0.3(3)     |
| C10 | C1  | C2  | C3  | 179.91(16)  | C25 | N1  | C12 | C13 | 177.88(19)  |
| C10 | C1  | C6  | C5  | 179.52(16)  | C25 | N1  | C15 | C14 | -178.25(18) |
| C10 | C1  | C6  | C7  | -0.1(3)     | C25 | N1  | C15 | C16 | 1.0(3)      |

**Table S14 Hydrogen Atom Coordinates ( $\text{\AA} \times 10^4$ ) and Isotropic Displacement Parameters ( $\text{\AA}^2 \times 10^3$ ) for 3aa.**

| Atom | x        | y        | z       | U(eq) |
|------|----------|----------|---------|-------|
| H2   | 7370.51  | 1973.58  | 7140.23 | 34    |
| H3   | 9415.56  | 1943.68  | 7861.12 | 38    |
| H4   | 10461.36 | 3624.77  | 8243.81 | 40    |
| H5   | 9468.03  | 5343.76  | 7909.15 | 37    |
| H16  | 2529.78  | 9382.29  | 5422.96 | 40    |
| H17  | 3882.52  | 10879.88 | 5878.16 | 43    |
| H18  | 5850.82  | 10558.41 | 6617.42 | 41    |
| H19  | 6554.15  | 8735.57  | 6928.89 | 34    |
| H21A | 4074.76  | 2844.76  | 5073.06 | 46    |
| H21B | 3343.37  | 3388.06  | 4338.11 | 46    |
| H22A | 1382.91  | 3809.98  | 5083.92 | 52    |
| H22B | 1702.22  | 2508.78  | 5164.58 | 52    |
| H23A | 1195.81  | 3285.25  | 6404.34 | 44    |
| H23B | 2714.22  | 2801.49  | 6395.55 | 44    |

**Table S14 Hydrogen Atom Coordinates ( $\text{\AA} \times 10^4$ ) and Isotropic Displacement Parameters ( $\text{\AA}^2 \times 10^3$ ) for **3aa**.**

| Atom | x       | y       | z       | U(eq) |
|------|---------|---------|---------|-------|
| H25A | 2106.93 | 7242.78 | 4686.52 | 67    |
| H25B | 1181.01 | 7477.47 | 5429.76 | 67    |
| H25C | 1609.67 | 6230.35 | 5216.55 | 67    |

### 3.2 X-Ray Crystallographic Data of **3af**

Single crystals of  $\text{C}_{55}\text{H}_{44}\text{Cl}_2\text{N}_2\text{O}_8$  **3af** were grown from ethyl acetate and PE. The ellipsoids are shown at 50% probability levels. A suitable crystal was selected and collected at 295.25 (10) K on a SuperNova, Dual, Cu at zero, AtlasS2 diffractometer. The data were collected and processed using CrysAlisPro. The structures were solved by direct methods using Olex2 software with the SHELXT structure solution program via intrinsic phasing algorithm, and the non-hydrogen atoms were located from the trial structure and then refined anisotropically with SHELXL-2018 using a full-matrix least squares procedure based on  $F^2$ . The weighted  $R$  factor,  $wR$  and goodness-of-fit  $S$  values were obtained based on  $F^2$ . The hydrogen atom positions were fixed geometrically at the calculated distances and allowed to ride on their parent atoms. Crystallographic data for the structure reported in this paper have been deposited at the Cambridge Crystallographic Data Center and allocated with the deposition numbers: CCDC 2277739 for compound **3af**.

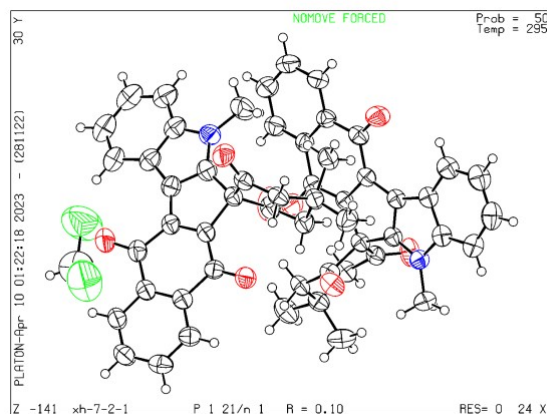

**Figure S18** ORTEP Drawing of **3af** (The ellipsoids are shown at 50% probability levels)

**Table S15** Crystal data and structure refinement for **3af**.

|                     |                                                             |
|---------------------|-------------------------------------------------------------|
| Identification code | <b>3af</b>                                                  |
| Empirical formula   | $\text{C}_{55}\text{H}_{44}\text{Cl}_2\text{N}_2\text{O}_8$ |
| Formula weight      | 931.82                                                      |
| Temperature/K       | 295.25(10)                                                  |
| Crystal system      | monoclinic                                                  |
| Space group         | $P2_1/n$                                                    |

|                                               |                                                               |
|-----------------------------------------------|---------------------------------------------------------------|
| $a/\text{\AA}$                                | 12.9040(3)                                                    |
| $b/\text{\AA}$                                | 19.5240(5)                                                    |
| $c/\text{\AA}$                                | 18.0622(6)                                                    |
| $\alpha/^\circ$                               | 90                                                            |
| $\beta/^\circ$                                | 98.725(3)                                                     |
| $\gamma/^\circ$                               | 90                                                            |
| Volume/ $\text{\AA}^3$                        | 4497.9(2)                                                     |
| $Z$                                           | 4                                                             |
| $\rho_{\text{calc}}/\text{g/cm}^3$            | 1.376                                                         |
| $\mu/\text{mm}^{-1}$                          | 1.799                                                         |
| $F(000)$                                      | 1944.0                                                        |
| Crystal size/ $\text{mm}^3$                   | $0.18 \times 0.15 \times 0.12$                                |
| Radiation                                     | Cu $K\alpha$ ( $\lambda = 1.54184$ )                          |
| $2\Theta$ range for data collection/ $^\circ$ | 6.708 to 133.2                                                |
| Index ranges                                  | $-14 \leq h \leq 15, -16 \leq k \leq 23, -21 \leq l \leq 21$  |
| Reflections collected                         | 31882                                                         |
| Independent reflections                       | 7932 [ $R_{\text{int}} = 0.0640, R_{\text{sigma}} = 0.0434$ ] |
| Data/restraints/parameters                    | 7932/0/611                                                    |
| Goodness-of-fit on $F^2$                      | 1.095                                                         |
| Final R indexes [ $I \geq 2\sigma(I)$ ]       | $R_1 = 0.0990, wR_2 = 0.2847$                                 |
| Final R indexes [all data]                    | $R_1 = 0.1180, wR_2 = 0.2981$                                 |
| Largest diff. peak/hole / $e \text{\AA}^{-3}$ | 1.50/-1.14                                                    |

### Crystal structure determination of 3af

**Crystal Data** for  $\text{C}_{55}\text{H}_{44}\text{Cl}_2\text{N}_2\text{O}_8$  ( $M = 931.82$  g/mol): monoclinic, space group  $P2_1/n$  (no. 14),  $a = 12.9040(3)$   $\text{\AA}$ ,  $b = 19.5240(5)$   $\text{\AA}$ ,  $c = 18.0622(6)$   $\text{\AA}$ ,  $\beta = 98.725(3)^\circ$ ,  $V = 4497.9(2)$   $\text{\AA}^3$ ,  $Z = 4$ ,  $T = 295.25(10)$  K,  $\mu(\text{Cu } K\alpha) = 1.799$   $\text{mm}^{-1}$ ,  $D_{\text{calc}} = 1.376$   $\text{g/cm}^3$ , 31882 reflections measured ( $6.708^\circ \leq 2\Theta \leq 133.2^\circ$ ), 7932 unique ( $R_{\text{int}} = 0.0640, R_{\text{sigma}} = 0.0434$ ) which were used in all calculations. The final  $R_1$  was 0.0990 ( $I > 2\sigma(I)$ ) and  $wR_2$  was 0.2981 (all data).

**Table S16 Fractional Atomic Coordinates ( $\times 10^4$ ) and Equivalent Isotropic Displacement Parameters ( $\text{\AA}^2 \times 10^3$ ) for 3af.  $U_{\text{eq}}$  is defined as 1/3 of the trace of the orthogonalised  $U_{ij}$  tensor.**

| Atom | $x$     | $y$        | $z$        | $U(\text{eq})$ |
|------|---------|------------|------------|----------------|
| Cl1  | 6027(3) | 5871.5(18) | 6024.1(16) | 166.1(13)      |
| Cl2  | 5773(4) | 5681(2)    | 4441(2)    | 198.4(18)      |
| C1S  | 5546(8) | 6134(6)    | 5149(5)    | 132(3)         |

**Table S16 Fractional Atomic Coordinates ( $\times 10^4$ ) and Equivalent Isotropic Displacement Parameters ( $\text{\AA}^2 \times 10^3$ ) for 3af.  $U_{\text{eq}}$  is defined as 1/3 of the trace of the orthogonalised  $U_{\text{IJ}}$  tensor.**

| Atom | <i>x</i> | <i>y</i>   | <i>z</i>   | $U(\text{eq})$ |
|------|----------|------------|------------|----------------|
| O1   | 2237(3)  | 2483.2(17) | 7094.3(19) | 59.3(9)        |
| O2   | -329(3)  | 1739.8(18) | 5424(2)    | 68.4(10)       |
| O3   | 2331(3)  | 2761.5(16) | 4648.1(19) | 58.6(9)        |
| O4   | 3508(3)  | 148.0(17)  | 5250(2)    | 63.4(9)        |
| N1   | 988(3)   | 1107.4(18) | 6955(2)    | 45.0(8)        |
| C1   | 1931(3)  | 221(2)     | 6559(2)    | 44.7(10)       |
| C2   | 2286(4)  | -461(2)    | 6565(3)    | 55.7(11)       |
| C3   | 1994(4)  | -905(3)    | 7081(3)    | 63.7(13)       |
| C4   | 1367(4)  | -693(3)    | 7601(3)    | 64.8(14)       |
| C5   | 1006(4)  | -27(2)     | 7620(3)    | 53.7(11)       |
| C6   | 1283(3)  | 422(2)     | 7083(2)    | 46.6(10)       |
| C7   | 1434(3)  | 1323(2)    | 6369(2)    | 43.1(9)        |
| C8   | 2026(3)  | 816(2)     | 6112(2)    | 41.8(9)        |
| C9   | 2497(3)  | 1095(2)    | 5509(2)    | 40.8(9)        |
| C10  | 2204(3)  | 1767(2)    | 5378(2)    | 39.3(9)        |
| C11  | 1455(3)  | 1980(2)    | 5937(2)    | 41.4(9)        |
| C12  | 1878(3)  | 2589(2)    | 6448(2)    | 43.5(9)        |
| C13  | 1760(3)  | 3290(2)    | 6113(3)    | 48.4(10)       |
| C14  | 618(3)   | 3446(2)    | 5772(3)    | 48.2(10)       |
| C15  | 198(3)   | 2888(2)    | 5203(3)    | 48.2(10)       |
| C16  | 351(3)   | 2167(2)    | 5502(2)    | 43.5(9)        |
| C17  | 2569(3)  | 2161(2)    | 4791(2)    | 43.2(9)        |
| C18  | 3290(3)  | 1800(2)    | 4340(2)    | 44.1(9)        |
| C19  | 3231(3)  | 735(2)     | 5093(2)    | 44.9(10)       |
| C20  | 3614(3)  | 1122(2)    | 4477(2)    | 44.3(9)        |
| C21  | 4283(4)  | 810(2)     | 4049(3)    | 54.8(11)       |
| C22  | 4614(5)  | 1170(3)    | 3471(3)    | 67.7(14)       |
| C23  | 4299(5)  | 1834(3)    | 3333(3)    | 71.5(15)       |
| C24  | 3635(4)  | 2151(3)    | 3754(3)    | 57.9(12)       |
| C25  | -61(5)   | 3470(3)    | 6401(3)    | 70.9(15)       |
| C26  | 590(5)   | 4136(3)    | 5377(3)    | 71.5(15)       |
| C27  | 302(4)   | 1496(3)    | 7368(3)    | 55.3(11)       |
| O54  | 4429(3)  | 2425(2)    | 6124(2)    | 84.0(13)       |
| O55  | 7702(2)  | 1820.0(18) | 7181(2)    | 63.8(9)        |
| O66  | 7517(3)  | 4685.6(19) | 6824(2)    | 75.7(11)       |
| O67  | 5562(3)  | 2898.7(17) | 8405(2)    | 63.2(9)        |

**Table S16 Fractional Atomic Coordinates ( $\times 10^4$ ) and Equivalent Isotropic Displacement Parameters ( $\text{\AA}^2 \times 10^3$ ) for 3af.  $U_{\text{eq}}$  is defined as 1/3 of the trace of the orthogonalised  $U_{\text{IJ}}$  tensor.**

| Atom | x       | y       | z       | U(eq)    |
|------|---------|---------|---------|----------|
| N64  | 6623(3) | 2366(2) | 5493(2) | 55.5(10) |
| C36  | 6123(3) | 2454(2) | 6856(2) | 44.4(9)  |
| C37  | 6251(3) | 3150(2) | 7292(2) | 44.2(9)  |
| C38  | 5958(3) | 3313(2) | 8016(2) | 44.9(10) |
| C39  | 6132(3) | 4040(2) | 8277(3) | 46.5(10) |
| C40  | 5777(4) | 4248(2) | 8927(3) | 51.7(11) |
| C41  | 5925(4) | 4916(3) | 9175(3) | 60.0(12) |
| C42  | 6426(4) | 5382(3) | 8773(3) | 61.0(13) |
| C43  | 6776(4) | 5185(2) | 8136(3) | 55.0(11) |
| C44  | 6634(3) | 4511(2) | 7873(3) | 47.2(10) |
| C45  | 6988(4) | 4315(2) | 7162(3) | 51.0(11) |
| C46  | 6686(3) | 3624(2) | 6877(2) | 44.6(9)  |
| C47  | 6843(3) | 3339(2) | 6167(3) | 49.9(10) |
| C48  | 6532(4) | 2666(2) | 6158(3) | 51.2(11) |
| C49  | 4943(3) | 2238(2) | 6701(3) | 52.3(11) |
| C50  | 4528(3) | 1812(2) | 7268(3) | 53.5(11) |
| C51  | 5251(3) | 1212(2) | 7573(3) | 49.7(10) |
| C52  | 6346(3) | 1495(2) | 7869(3) | 47.5(10) |
| C53  | 6816(3) | 1902(2) | 7311(2) | 45.4(10) |
| C56  | 4806(5) | 865(3)  | 8217(3) | 68.2(14) |
| C57  | 5317(4) | 688(3)  | 6959(3) | 62.1(13) |
| C58  | 6990(4) | 2865(3) | 5042(3) | 55.8(12) |
| C59  | 7168(4) | 2805(3) | 4313(3) | 68.5(14) |
| C60  | 7462(4) | 3394(4) | 3970(3) | 76.7(17) |
| C61  | 7606(4) | 4011(4) | 4347(3) | 73.5(16) |
| C62  | 7450(4) | 4068(3) | 5081(3) | 62.3(13) |
| C63  | 7127(3) | 3488(3) | 5445(3) | 54.4(11) |
| C65  | 6391(5) | 1661(3) | 5273(3) | 77.1(16) |

**Table S17 Anisotropic Displacement Parameters ( $\text{\AA}^2 \times 10^3$ ) for 3af. The Anisotropic displacement factor exponent takes the form: -  $2\pi^2[h^2a^{*2}U_{11}+2hka^*b^*U_{12}+\dots]$ .**

| Atom | $U_{11}$ | $U_{22}$ | $U_{33}$  | $U_{23}$ | $U_{13}$ | $U_{12}$ |
|------|----------|----------|-----------|----------|----------|----------|
| Cl1  | 211(3)   | 167(3)   | 111.2(19) | 10.3(17) | -5(2)    | -39(2)   |
| Cl2  | 310(5)   | 165(3)   | 130(2)    | -33(2)   | 66(3)    | -20(3)   |

**Table S17 Anisotropic Displacement Parameters ( $\text{\AA}^2 \times 10^3$ ) for 3af. The Anisotropic displacement factor exponent takes the form: -**

$$2\pi^2[h^2a^*2U_{11}+2hka^*b^*U_{12}+\dots].$$

| Atom | $U_{11}$ | $U_{22}$ | $U_{33}$ | $U_{23}$ | $U_{13}$  | $U_{12}$  |
|------|----------|----------|----------|----------|-----------|-----------|
| C1S  | 116(7)   | 151(8)   | 123(7)   | -3(6)    | -6(6)     | 11(6)     |
| O1   | 64(2)    | 55.0(19) | 52(2)    | -2.1(14) | -13.1(16) | 6.5(15)   |
| O2   | 50.8(19) | 62(2)    | 86(3)    | 10.1(18) | -8.7(17)  | -13.0(16) |
| O3   | 66(2)    | 44.7(18) | 67(2)    | 13.5(15) | 18.0(17)  | 9.6(15)   |
| O4   | 71(2)    | 49.1(19) | 73(2)    | 9.5(16)  | 20.8(18)  | 20.6(16)  |
| N1   | 45.8(19) | 43.8(19) | 45(2)    | 3.3(15)  | 7.1(15)   | 3.3(15)   |
| C1   | 43(2)    | 42(2)    | 46(2)    | 5.1(17)  | -1.7(18)  | 2.8(17)   |
| C2   | 56(3)    | 49(3)    | 60(3)    | 7(2)     | 0(2)      | 9(2)      |
| C3   | 68(3)    | 49(3)    | 71(3)    | 17(2)    | -3(3)     | 8(2)      |
| C4   | 62(3)    | 61(3)    | 67(3)    | 25(3)    | -4(3)     | -5(2)     |
| C5   | 49(2)    | 58(3)    | 52(3)    | 12(2)    | 2(2)      | 1(2)      |
| C6   | 42(2)    | 47(2)    | 48(2)    | 6.0(18)  | -2.5(18)  | 1.0(18)   |
| C7   | 43(2)    | 39(2)    | 46(2)    | 1.4(17)  | 2.3(18)   | 1.1(17)   |
| C8   | 40(2)    | 38(2)    | 46(2)    | 1.9(17)  | -0.3(17)  | 2.8(16)   |
| C9   | 40(2)    | 39(2)    | 41(2)    | -1.5(16) | -1.0(16)  | 1.6(16)   |
| C10  | 39(2)    | 37(2)    | 40(2)    | -2.0(16) | 0.3(16)   | -1.3(15)  |
| C11  | 40(2)    | 37(2)    | 45(2)    | 0.8(16)  | -0.5(17)  | 4.0(16)   |
| C12  | 37(2)    | 44(2)    | 47(2)    | -5.1(18) | -0.8(18)  | 5.6(17)   |
| C13  | 51(2)    | 39(2)    | 53(3)    | -7.6(18) | -1(2)     | -3.9(18)  |
| C14  | 51(2)    | 41(2)    | 51(3)    | -0.9(18) | 0.6(19)   | 8.3(18)   |
| C15  | 39(2)    | 47(2)    | 55(3)    | 0.2(19)  | -5.9(18)  | 4.5(17)   |
| C16  | 38(2)    | 45(2)    | 45(2)    | -4.8(17) | -1.2(17)  | -1.2(17)  |
| C17  | 42(2)    | 39(2)    | 46(2)    | 0.6(17)  | -1.1(17)  | -0.5(16)  |
| C18  | 44(2)    | 45(2)    | 42(2)    | -2.6(17) | 3.7(18)   | -4.1(17)  |
| C19  | 43(2)    | 40(2)    | 49(2)    | -3.0(18) | -2.2(18)  | 5.3(17)   |
| C20  | 42(2)    | 48(2)    | 42(2)    | -6.8(18) | 3.4(17)   | 0.2(17)   |
| C21  | 59(3)    | 51(3)    | 56(3)    | -11(2)   | 13(2)     | 1(2)      |
| C22  | 80(4)    | 68(3)    | 61(3)    | -11(3)   | 31(3)     | 5(3)      |
| C23  | 96(4)    | 66(3)    | 61(3)    | -2(3)    | 38(3)     | -8(3)     |
| C24  | 72(3)    | 51(3)    | 53(3)    | -3(2)    | 16(2)     | -2(2)     |
| C25  | 71(3)    | 80(4)    | 63(3)    | -5(3)    | 14(3)     | 26(3)     |
| C26  | 83(4)    | 49(3)    | 77(4)    | 5(2)     | -6(3)     | 8(3)      |
| C27  | 52(2)    | 61(3)    | 56(3)    | -2(2)    | 16(2)     | 6(2)      |
| O54  | 56(2)    | 107(3)   | 79(3)    | 31(2)    | -23(2)    | -17(2)    |
| O55  | 43.0(18) | 63(2)    | 87(3)    | 4.4(18)  | 12.7(16)  | 7.6(15)   |
| O66  | 92(3)    | 60(2)    | 81(3)    | -5.5(18) | 31(2)     | -23(2)    |



**Table S17 Anisotropic Displacement Parameters ( $\text{\AA}^2 \times 10^3$ ) for 3af. The Anisotropic displacement factor exponent takes the form: -**

$$2\pi^2[h^2a^{*2}U_{11}+2hka^*b^*U_{12}+\dots].$$

| Atom | $U_{11}$ | $U_{22}$ | $U_{33}$ | $U_{23}$ | $U_{13}$ | $U_{12}$ |
|------|----------|----------|----------|----------|----------|----------|
| O67  | 87(2)    | 46.7(18) | 61(2)    | 4.6(15)  | 27.9(18) | -3.8(16) |
| N64  | 57(2)    | 61(2)    | 48(2)    | -9.3(18) | 6.1(18)  | -4.3(18) |
| C36  | 42(2)    | 41(2)    | 48(2)    | -2.7(17) | 1.6(18)  | -1.4(17) |
| C37  | 38(2)    | 39(2)    | 53(2)    | -0.9(18) | -0.2(18) | 1.0(16)  |
| C38  | 42(2)    | 43(2)    | 49(2)    | 1.8(18)  | 6.3(18)  | 5.2(17)  |
| C39  | 41(2)    | 43(2)    | 53(3)    | 2.3(18)  | -0.9(18) | 5.8(17)  |
| C40  | 52(2)    | 52(3)    | 51(3)    | 0(2)     | 7(2)     | 8(2)     |
| C41  | 58(3)    | 61(3)    | 60(3)    | -11(2)   | 6(2)     | 13(2)    |
| C42  | 58(3)    | 47(3)    | 76(3)    | -13(2)   | 4(2)     | 1(2)     |
| C43  | 51(2)    | 43(2)    | 71(3)    | -2(2)    | 8(2)     | -4.2(19) |
| C44  | 39(2)    | 41(2)    | 59(3)    | -0.3(19) | -0.6(19) | 3.4(17)  |
| C45  | 49(2)    | 46(2)    | 58(3)    | 6(2)     | 7(2)     | -2.9(19) |
| C46  | 34.9(19) | 46(2)    | 50(2)    | 0.5(18)  | -0.8(17) | -0.8(17) |
| C47  | 44(2)    | 54(3)    | 51(3)    | 1(2)     | 4.3(19)  | -3.2(19) |
| C48  | 49(2)    | 53(3)    | 50(3)    | -3(2)    | 0(2)     | -4(2)    |
| C49  | 41(2)    | 50(2)    | 62(3)    | 0(2)     | -5(2)    | -0.3(19) |
| C50  | 38(2)    | 52(3)    | 69(3)    | 0(2)     | 1(2)     | -0.3(18) |
| C51  | 48(2)    | 42(2)    | 59(3)    | -1.1(19) | 6(2)     | -3.2(18) |
| C52  | 47(2)    | 41(2)    | 50(2)    | -3.9(18) | -3.3(19) | 8.0(18)  |
| C53  | 40(2)    | 42(2)    | 51(2)    | -6.8(18) | -1.9(18) | 2.8(17)  |
| C56  | 68(3)    | 63(3)    | 76(4)    | 9(3)     | 19(3)    | -1(2)    |
| C57  | 60(3)    | 54(3)    | 71(3)    | -8(2)    | 8(2)     | -7(2)    |
| C58  | 43(2)    | 76(3)    | 47(3)    | -1(2)    | 2.8(19)  | -3(2)    |
| C59  | 52(3)    | 96(4)    | 56(3)    | -9(3)    | 4(2)     | -4(3)    |
| C60  | 53(3)    | 123(5)   | 54(3)    | 4(3)     | 9(2)     | -6(3)    |
| C61  | 56(3)    | 100(4)   | 64(3)    | 19(3)    | 10(3)    | -7(3)    |
| C62  | 48(3)    | 75(3)    | 64(3)    | 10(3)    | 10(2)    | -5(2)    |
| C63  | 41(2)    | 71(3)    | 50(3)    | 1(2)     | 2.8(19)  | -2(2)    |
| C65  | 97(4)    | 72(4)    | 62(3)    | -22(3)   | 12(3)    | -16(3)   |

**Table S18 Bond Lengths for 3af.**

| Atom | Atom | Length/ $\text{\AA}$ | Atom | Atom | Length/ $\text{\AA}$ |
|------|------|----------------------|------|------|----------------------|
| C11  | C1S  | 1.688(10)            | C23  | C24  | 1.376(7)             |
| C12  | C1S  | 1.618(10)            | O54  | C49  | 1.203(6)             |
| O1   | C12  | 1.207(5)             | O55  | C53  | 1.211(5)             |

**Table S18 Bond Lengths for 3af.**

| Atom | Atom | Length/Å | Atom | Atom | Length/Å |
|------|------|----------|------|------|----------|
| O2   | C16  | 1.204(5) | O66  | C45  | 1.220(6) |
| O3   | C17  | 1.230(5) | O67  | C38  | 1.232(5) |
| O4   | C19  | 1.222(5) | N64  | C48  | 1.356(6) |
| N1   | C6   | 1.401(5) | N64  | C58  | 1.399(6) |
| N1   | C7   | 1.346(6) | N64  | C65  | 1.452(7) |
| N1   | C27  | 1.455(6) | C36  | C37  | 1.568(6) |
| C1   | C2   | 1.408(6) | C36  | C48  | 1.498(7) |
| C1   | C6   | 1.411(6) | C36  | C49  | 1.563(6) |
| C1   | C8   | 1.431(6) | C36  | C53  | 1.554(6) |
| C2   | C3   | 1.368(7) | C37  | C38  | 1.449(6) |
| C3   | C4   | 1.392(8) | C37  | C46  | 1.364(6) |
| C4   | C5   | 1.385(7) | C38  | C39  | 1.502(6) |
| C5   | C6   | 1.393(6) | C39  | C40  | 1.385(6) |
| C7   | C8   | 1.374(6) | C39  | C44  | 1.393(6) |
| C7   | C11  | 1.504(6) | C40  | C41  | 1.383(7) |
| C8   | C9   | 1.432(6) | C41  | C42  | 1.384(8) |
| C9   | C10  | 1.377(6) | C42  | C43  | 1.354(7) |
| C9   | C19  | 1.473(6) | C43  | C44  | 1.402(6) |
| C10  | C11  | 1.556(6) | C44  | C45  | 1.476(7) |
| C10  | C17  | 1.446(6) | C45  | C46  | 1.477(6) |
| C11  | C12  | 1.552(6) | C46  | C47  | 1.440(6) |
| C11  | C16  | 1.562(5) | C47  | C48  | 1.373(6) |
| C12  | C13  | 1.494(6) | C47  | C63  | 1.437(7) |
| C13  | C14  | 1.540(6) | C49  | C50  | 1.482(7) |
| C14  | C15  | 1.538(6) | C50  | C51  | 1.546(6) |
| C14  | C25  | 1.537(7) | C51  | C52  | 1.535(6) |
| C14  | C26  | 1.523(7) | C51  | C56  | 1.532(7) |
| C15  | C16  | 1.510(6) | C51  | C57  | 1.522(7) |
| C17  | C18  | 1.503(6) | C52  | C53  | 1.483(6) |
| C18  | C20  | 1.398(6) | C58  | C59  | 1.376(7) |
| C18  | C24  | 1.390(6) | C58  | C63  | 1.414(7) |
| C19  | C20  | 1.490(6) | C59  | C60  | 1.386(9) |
| C20  | C21  | 1.385(6) | C60  | C61  | 1.381(9) |
| C21  | C22  | 1.380(7) | C61  | C62  | 1.376(8) |
| C22  | C23  | 1.370(8) | C62  | C63  | 1.405(7) |

**Table S19 Bond Angles for 3af.**

| Atom | Atom | Atom | Angle/°  | Atom | Atom | Atom | Angle/°  |
|------|------|------|----------|------|------|------|----------|
| C12  | C1S  | C11  | 119.3(7) | C48  | N64  | C58  | 107.2(4) |
| C6   | N1   | C27  | 125.7(4) | C48  | N64  | C65  | 127.6(4) |
| C7   | N1   | C6   | 106.9(3) | C58  | N64  | C65  | 125.1(4) |
| C7   | N1   | C27  | 127.3(4) | C48  | C36  | C37  | 99.2(3)  |
| C2   | C1   | C6   | 118.9(4) | C48  | C36  | C49  | 112.5(4) |
| C2   | C1   | C8   | 135.8(4) | C48  | C36  | C53  | 112.9(4) |
| C6   | C1   | C8   | 105.3(4) | C49  | C36  | C37  | 110.4(3) |
| C3   | C2   | C1   | 118.8(5) | C53  | C36  | C37  | 109.1(3) |
| C2   | C3   | C4   | 121.3(5) | C53  | C36  | C49  | 112.0(3) |
| C5   | C4   | C3   | 121.9(5) | C38  | C37  | C36  | 128.4(4) |
| C4   | C5   | C6   | 116.8(5) | C46  | C37  | C36  | 109.4(4) |
| N1   | C6   | C1   | 109.1(4) | C46  | C37  | C38  | 122.2(4) |
| C5   | C6   | N1   | 128.6(4) | O67  | C38  | C37  | 123.9(4) |
| C5   | C6   | C1   | 122.3(4) | O67  | C38  | C39  | 119.8(4) |
| N1   | C7   | C8   | 111.5(4) | C37  | C38  | C39  | 116.3(4) |
| N1   | C7   | C11  | 135.9(4) | C40  | C39  | C38  | 119.3(4) |
| C8   | C7   | C11  | 112.6(4) | C40  | C39  | C44  | 119.4(4) |
| C1   | C8   | C9   | 145.1(4) | C44  | C39  | C38  | 121.2(4) |
| C7   | C8   | C1   | 107.1(4) | C41  | C40  | C39  | 120.2(5) |
| C7   | C8   | C9   | 107.8(4) | C40  | C41  | C42  | 120.2(5) |
| C8   | C9   | C19  | 125.9(4) | C43  | C42  | C41  | 120.1(5) |
| C10  | C9   | C8   | 110.8(4) | C42  | C43  | C44  | 120.8(5) |
| C10  | C9   | C19  | 123.2(4) | C39  | C44  | C43  | 119.3(4) |
| C9   | C10  | C11  | 109.0(3) | C39  | C44  | C45  | 121.0(4) |
| C9   | C10  | C17  | 121.4(4) | C43  | C44  | C45  | 119.7(4) |
| C17  | C10  | C11  | 129.6(3) | O66  | C45  | C44  | 123.6(4) |
| C7   | C11  | C10  | 99.8(3)  | O66  | C45  | C46  | 120.3(4) |
| C7   | C11  | C12  | 112.2(3) | C44  | C45  | C46  | 116.1(4) |
| C7   | C11  | C16  | 112.0(3) | C37  | C46  | C45  | 122.5(4) |
| C10  | C11  | C16  | 110.1(3) | C37  | C46  | C47  | 110.7(4) |
| C12  | C11  | C10  | 113.2(3) | C47  | C46  | C45  | 126.8(4) |
| C12  | C11  | C16  | 109.4(3) | C48  | C47  | C46  | 107.4(4) |
| O1   | C12  | C11  | 119.5(4) | C48  | C47  | C63  | 107.3(4) |
| O1   | C12  | C13  | 123.3(4) | C63  | C47  | C46  | 145.1(4) |
| C13  | C12  | C11  | 117.1(4) | N64  | C48  | C36  | 135.6(4) |
| C12  | C13  | C14  | 112.0(4) | N64  | C48  | C47  | 111.1(4) |
| C15  | C14  | C13  | 110.2(3) | C47  | C48  | C36  | 113.2(4) |
| C25  | C14  | C13  | 109.2(4) | O54  | C49  | C36  | 117.9(4) |
| C25  | C14  | C15  | 109.4(4) | O54  | C49  | C50  | 124.0(4) |

**Table S19 Bond Angles for 3af.**

|     |     |     |          |     |     |     |          |
|-----|-----|-----|----------|-----|-----|-----|----------|
| C26 | C14 | C13 | 108.4(4) | C50 | C49 | C36 | 118.1(4) |
| C26 | C14 | C15 | 109.5(4) | C49 | C50 | C51 | 114.2(4) |
| C26 | C14 | C25 | 110.1(4) | C52 | C51 | C50 | 109.0(3) |
| C16 | C15 | C14 | 114.0(4) | C56 | C51 | C50 | 109.3(4) |
| O2  | C16 | C11 | 119.4(4) | C56 | C51 | C52 | 109.0(4) |
| O2  | C16 | C15 | 123.4(4) | C57 | C51 | C50 | 110.3(4) |
| C15 | C16 | C11 | 117.3(3) | C57 | C51 | C52 | 110.2(4) |
| O3  | C17 | C10 | 124.2(4) | C57 | C51 | C56 | 109.0(4) |
| O3  | C17 | C18 | 119.3(4) | C53 | C52 | C51 | 113.9(4) |
| C10 | C17 | C18 | 116.5(3) | O55 | C53 | C36 | 118.3(4) |
| C20 | C18 | C17 | 122.7(4) | O55 | C53 | C52 | 123.8(4) |
| C24 | C18 | C17 | 118.5(4) | C52 | C53 | C36 | 117.9(4) |
| C24 | C18 | C20 | 118.7(4) | N64 | C58 | C63 | 109.1(4) |
| O4  | C19 | C9  | 121.1(4) | C59 | C58 | N64 | 128.2(5) |
| O4  | C19 | C20 | 122.1(4) | C59 | C58 | C63 | 122.7(5) |
| C9  | C19 | C20 | 116.8(3) | C58 | C59 | C60 | 117.0(6) |
| C18 | C20 | C19 | 119.2(4) | C61 | C60 | C59 | 121.9(6) |
| C21 | C20 | C18 | 120.8(4) | C62 | C61 | C60 | 121.1(6) |
| C21 | C20 | C19 | 119.9(4) | C61 | C62 | C63 | 118.9(6) |
| C22 | C21 | C20 | 119.3(5) | C58 | C63 | C47 | 105.3(4) |
| C23 | C22 | C21 | 120.1(5) | C62 | C63 | C47 | 136.3(5) |
| C22 | C23 | C24 | 121.3(5) | C62 | C63 | C58 | 118.4(5) |
| C23 | C24 | C18 | 119.7(5) |     |     |     |          |

**Table S20 Torsion Angles for 3af.**

| A  | B   | C   | D   | Angle/°   | A   | B   | C   | D   | Angle/°   |
|----|-----|-----|-----|-----------|-----|-----|-----|-----|-----------|
| O1 | C12 | C13 | C14 | -122.7(5) | O54 | C49 | C50 | C51 | 134.8(5)  |
| O3 | C17 | C18 | C20 | 178.7(4)  | O66 | C45 | C46 | C37 | 168.7(5)  |
| O3 | C17 | C18 | C24 | -2.4(6)   | O66 | C45 | C46 | C47 | -8.1(7)   |
| O4 | C19 | C20 | C18 | -178.2(4) | O67 | C38 | C39 | C40 | -4.6(6)   |
| O4 | C19 | C20 | C21 | 1.7(6)    | O67 | C38 | C39 | C44 | 176.1(4)  |
| N1 | C7  | C8  | C1  | 1.4(5)    | N64 | C58 | C59 | C60 | 175.5(5)  |
| N1 | C7  | C8  | C9  | -178.1(3) | N64 | C58 | C63 | C47 | 1.0(5)    |
| N1 | C7  | C11 | C10 | 177.8(5)  | N64 | C58 | C63 | C62 | -177.3(4) |
| N1 | C7  | C11 | C12 | 57.7(6)   | C36 | C37 | C38 | O67 | 1.1(7)    |
| N1 | C7  | C11 | C16 | -65.7(6)  | C36 | C37 | C38 | C39 | -177.2(4) |
| C1 | C2  | C3  | C4  | -0.7(8)   | C36 | C37 | C46 | C45 | -174.8(4) |

|                |           |                 |           |
|----------------|-----------|-----------------|-----------|
| C1 C8 C9 C10   | -179.7(6) | C36 C37 C46 C47 | 2.4(5)    |
| C1 C8 C9 C19   | -1.9(9)   | C36 C49 C50 C51 | -44.7(6)  |
| C2 C1 C6 N1    | -177.4(4) | C37 C36 C48 N64 | -175.5(5) |
| C2 C1 C6 C5    | 1.9(7)    | C37 C36 C48 C47 | 0.1(5)    |
| C2 C1 C8 C7    | 176.3(5)  | C37 C36 C49 O54 | 90.8(5)   |
| C2 C1 C8 C9    | -4.7(10)  | C37 C36 C49 C50 | -89.7(5)  |
| C2 C3 C4 C5    | 0.3(8)    | C37 C36 C53 O55 | -91.7(5)  |
| C3 C4 C5 C6    | 1.2(7)    | C37 C36 C53 C52 | 89.4(4)   |
| C4 C5 C6 N1    | 176.8(4)  | C37 C38 C39 C40 | 173.8(4)  |
| C4 C5 C6 C1    | -2.3(7)   | C37 C38 C39 C44 | -5.5(6)   |
| C6 N1 C7 C8    | -1.0(5)   | C37 C46 C47 C48 | -2.3(5)   |
| C6 N1 C7 C11   | 179.9(5)  | C37 C46 C47 C63 | 171.4(6)  |
| C6 C1 C2 C3    | -0.3(7)   | C38 C37 C46 C45 | 6.2(6)    |
| C6 C1 C8 C7    | -1.1(5)   | C38 C37 C46 C47 | -176.6(4) |
| C6 C1 C8 C9    | 178.0(6)  | C38 C39 C40 C41 | -179.7(4) |
| C7 N1 C6 C1    | 0.3(5)    | C38 C39 C44 C43 | 179.7(4)  |
| C7 N1 C6 C5    | -178.9(4) | C38 C39 C44 C45 | 1.7(6)    |
| C7 C8 C9 C10   | -0.6(5)   | C39 C40 C41 C42 | 0.3(7)    |
| C7 C8 C9 C19   | 177.2(4)  | C39 C44 C45 O66 | -172.8(5) |
| C7 C11 C12 O1  | 7.3(6)    | C39 C44 C45 C46 | 5.7(6)    |
| C7 C11 C12 C13 | -169.5(4) | C40 C39 C44 C43 | 0.4(6)    |
| C7 C11 C16 O2  | -14.2(6)  | C40 C39 C44 C45 | -177.6(4) |
| C7 C11 C16 C15 | 165.4(4)  | C40 C41 C42 C43 | -0.2(8)   |
| C8 C1 C2 C3    | -177.5(5) | C41 C42 C43 C44 | 0.2(7)    |
| C8 C1 C6 N1    | 0.5(5)    | C42 C43 C44 C39 | -0.3(7)   |
| C8 C1 C6 C5    | 179.8(4)  | C42 C43 C44 C45 | 177.8(4)  |
| C8 C7 C11 C10  | -1.3(4)   | C43 C44 C45 O66 | 9.2(7)    |
| C8 C7 C11 C12  | -121.4(4) | C43 C44 C45 C46 | -172.3(4) |
| C8 C7 C11 C16  | 115.3(4)  | C44 C39 C40 C41 | -0.4(6)   |
| C8 C9 C10 C11  | -0.2(4)   | C44 C45 C46 C37 | -9.8(6)   |
| C8 C9 C10 C17  | -179.4(3) | C44 C45 C46 C47 | 173.4(4)  |
| C8 C9 C19 O4   | -0.9(7)   | C45 C46 C47 C48 | 174.8(4)  |
| C8 C9 C19 C20  | 179.1(4)  | C45 C46 C47 C63 | -11.5(9)  |
| C9 C10 C11 C7  | 0.8(4)    | C46 C37 C38 O67 | 179.9(4)  |
| C9 C10 C11 C12 | 120.2(4)  | C46 C37 C38 C39 | 1.6(6)    |
| C9 C10 C11 C16 | -117.0(4) | C46 C47 C48 N64 | 178.0(4)  |
| C9 C10 C17 O3  | 179.8(4)  | C46 C47 C48 C36 | 1.2(5)    |
| C9 C10 C17 C18 | -0.6(6)   | C46 C47 C63 C58 | -175.3(6) |
| C9 C19 C20 C18 | 1.8(6)    | C46 C47 C63 C62 | 2.5(11)   |
| C9 C19 C20 C21 | -178.3(4) | C48 N64 C58 C59 | -177.6(5) |

|              |           |                 |           |
|--------------|-----------|-----------------|-----------|
| C10C9 C19O4  | 176.6(4)  | C48 N64 C58 C63 | 0.1(5)    |
| C10C9 C19C20 | -3.3(6)   | C48 C36 C37 C38 | 177.4(4)  |
| C10C11C12O1  | -104.7(5) | C48 C36 C37 C46 | -1.5(4)   |
| C10C11C12C13 | 78.6(4)   | C48 C36 C49 O54 | -19.0(6)  |
| C10C11C16O2  | 95.9(5)   | C48 C36 C49 C50 | 160.5(4)  |
| C10C11C16C15 | -84.5(4)  | C48 C36 C53 O55 | 17.5(6)   |
| C10C17C18C20 | -0.9(6)   | C48 C36 C53 C52 | -161.3(4) |
| C10C17C18C24 | 178.0(4)  | C48 C47 C63 C58 | -1.6(5)   |
| C11C7 C8 C1  | -179.3(3) | C48 C47 C63 C62 | 176.2(5)  |
| C11C7 C8 C9  | 1.2(5)    | C49 C36 C37 C38 | 59.1(5)   |
| C11C10C17O3  | 0.9(7)    | C49 C36 C37 C46 | -119.8(4) |
| C11C10C17C18 | -179.5(4) | C49 C36 C48 N64 | -58.8(7)  |
| C11C12C13C14 | 53.9(5)   | C49 C36 C48 C47 | 116.9(4)  |
| C12C11C16O2  | -139.2(4) | C49 C36 C53 O55 | 145.7(4)  |
| C12C11C16C15 | 40.4(5)   | C49 C36 C53 C52 | -33.2(5)  |
| C12C13C14C15 | -54.6(5)  | C49 C50 C51 C52 | 54.2(5)   |
| C12C13C14C25 | 65.6(5)   | C49 C50 C51 C56 | 173.3(4)  |
| C12C13C14C26 | -174.4(4) | C49 C50 C51 C57 | -67.0(5)  |
| C13C14C15C16 | 51.4(5)   | C50 C51 C52 C53 | -55.3(5)  |
| C14C15C16O2  | 133.1(5)  | C51 C52 C53 O55 | -131.7(5) |
| C14C15C16C11 | -46.5(5)  | C51 C52 C53 C36 | 47.1(5)   |
| C16C11C12O1  | 132.1(4)  | C53 C36 C37 C38 | -64.4(5)  |
| C16C11C12C13 | -44.6(5)  | C53 C36 C37 C46 | 116.7(4)  |
| C17C10C11C7  | 179.9(4)  | C53 C36 C48 N64 | 69.1(6)   |
| C17C10C11C12 | -60.7(5)  | C53 C36 C48 C47 | -115.2(4) |
| C17C10C11C16 | 62.0(5)   | C53 C36 C49 O54 | -147.3(5) |
| C17C18C20C19 | 0.2(6)    | C53 C36 C49 C50 | 32.1(6)   |
| C17C18C20C21 | -179.7(4) | C56 C51 C52 C53 | -174.5(4) |
| C17C18C24C23 | 179.8(5)  | C57 C51 C52 C53 | 65.9(5)   |
| C18C20C21C22 | -1.4(7)   | C58 N64 C48 C36 | 174.6(5)  |
| C19C9 C10C11 | -178.1(4) | C58 N64 C48 C47 | -1.1(5)   |
| C19C9 C10C17 | 2.7(6)    | C58 C59 C60 C61 | 2.1(8)    |
| C19C20C21C22 | 178.7(4)  | C59 C58 C63 C47 | 178.8(4)  |
| C20C18C24C23 | -1.2(7)   | C59 C58 C63 C62 | 0.5(7)    |
| C20C21C22C23 | 1.3(8)    | C59 C60 C61 C62 | -0.8(9)   |
| C21C22C23C24 | -1.2(9)   | C60 C61 C62 C63 | -0.7(8)   |
| C22C23C24C18 | 1.2(9)    | C61 C62 C63 C47 | -176.8(5) |
| C24C18C20C19 | -178.7(4) | C61 C62 C63 C58 | 0.8(7)    |
| C24C18C20C21 | 1.4(6)    | C63 C47 C48 N64 | 1.8(5)    |
| C25C14C15C16 | -68.7(5)  | C63 C47 C48 C36 | -175.0(4) |

|              |           |                 |           |
|--------------|-----------|-----------------|-----------|
| C26C14C15C16 | 170.5(4)  | C63 C58 C59 C60 | -2.0(7)   |
| C27N1 C6 C1  | 178.6(4)  | C65 N64 C48 C36 | -5.4(9)   |
| C27N1 C6 C5  | -0.7(7)   | C65 N64 C48 C47 | 178.9(5)  |
| C27N1 C7 C8  | -179.3(4) | C65 N64 C58 C59 | 2.4(8)    |
| C27N1 C7 C11 | 1.6(8)    | C65 N64 C58 C63 | -179.9(5) |

**Table S21 Hydrogen Atom Coordinates ( $\text{\AA}\times 10^4$ ) and Isotropic Displacement Parameters ( $\text{\AA}^2\times 10^3$ ) for 3af.**

| Atom | <i>x</i> | <i>y</i> | <i>z</i> | U(eq) |
|------|----------|----------|----------|-------|
| H1SA | 4791.85  | 6175.2   | 5118.92  | 159   |
| H1SB | 5815.64  | 6591.28  | 5087.06  | 159   |
| H2   | 2711.57  | -607.36  | 6223.67  | 67    |
| H3   | 2218.82  | -1358.13 | 7085.37  | 76    |
| H4   | 1185.92  | -1008.53 | 7945.96  | 78    |
| H5   | 597.71   | 114.79   | 7974.45  | 64    |
| H13A | 2203.01  | 3328.71  | 5726.29  | 58    |
| H13B | 1995.6   | 3626.04  | 6497.12  | 58    |
| H15A | -545.15  | 2965.17  | 5042.59  | 58    |
| H15B | 546.42   | 2932     | 4765.64  | 58    |
| H21  | 4507.1   | 362.41   | 4150.8   | 66    |
| H22  | 5052.29  | 961.62   | 3173.42  | 81    |
| H23  | 4537.55  | 2074.42  | 2947.88  | 86    |
| H24  | 3418.77  | 2599.62  | 3647.04  | 70    |
| H25A | -773.54  | 3570.14  | 6190.73  | 106   |
| H25B | 198.05   | 3819.29  | 6754.33  | 106   |
| H25C | -31.93   | 3034     | 6649.51  | 106   |
| H26A | 1029.86  | 4119.57  | 4993.64  | 107   |
| H26B | 840.65   | 4485.73  | 5733.93  | 107   |
| H26C | -116.21  | 4239.11  | 5155.16  | 107   |
| H27A | -337.5   | 1603.04  | 7043.37  | 83    |
| H27B | 644.43   | 1912.14  | 7550.87  | 83    |
| H27C | 145.4    | 1227.83  | 7783.12  | 83    |
| H40  | 5437.07  | 3936.74  | 9198.17  | 62    |
| H41  | 5688.09  | 5052.17  | 9613.43  | 72    |
| H42  | 6523.08  | 5831.19  | 8940.8   | 73    |
| H43  | 7113.64  | 5500.55  | 7869.47  | 66    |
| H50A | 3853.12  | 1627.43  | 7048.16  | 64    |
| H50B | 4413.91  | 2102.17  | 7684.54  | 64    |
| H52A | 6300.23  | 1780.8   | 8301.91  | 57    |
| H52B | 6808.11  | 1114.79  | 8033.13  | 57    |

**Table S21 Hydrogen Atom Coordinates ( $\text{\AA}\times 10^4$ ) and Isotropic Displacement Parameters ( $\text{\AA}^2\times 10^3$ ) for 3af.**

| Atom | <i>x</i> | <i>y</i> | <i>z</i> | U(eq) |
|------|----------|----------|----------|-------|
| H56A | 5268.59  | 503.68   | 8420.89  | 102   |
| H56B | 4128.15  | 677.48   | 8033.73  | 102   |
| H56C | 4743.33  | 1195.6   | 8601.34  | 102   |
| H57A | 5605.82  | 900.2    | 6555.85  | 93    |
| H57B | 4628.08  | 517.76   | 6775.04  | 93    |
| H57C | 5759.27  | 315.17   | 7157.01  | 93    |
| H59  | 7094.01  | 2388.16  | 4061.56  | 82    |
| H60  | 7566.12  | 3373.42  | 3472.43  | 92    |
| H61  | 7812.5   | 4393.84  | 4099.4   | 88    |
| H62  | 7555.82  | 4484.4   | 5331.5   | 75    |
| H65A | 6478.03  | 1374.12  | 5710.08  | 116   |
| H65B | 6860.43  | 1512.63  | 4940.37  | 116   |
| H65C | 5681.21  | 1628.51  | 5022.82  | 116   |

### 3.3 X-Ray Crystallographic Data of 4ka

Single crystals of  $\text{C}_{25}\text{H}_{18}\text{ClNO}_4$  **4ka** were grown from  $\text{CH}_3\text{OH}$  and  $\text{CH}_2\text{Cl}_2$ . The ellipsoids are shown at 50% probability levels. A suitable crystal was selected and collected at 100(10) K on a SuperNova, Dual, Cu at zero, AtlasS2 diffractometer. The data were collected and processed using CrysAlisPro. The structures were solved by direct methods using Olex2 software with the SHELXT structure solution program via intrinsic phasing algorithm, and the non-hydrogen atoms were located from the trial structure and then refined anisotropically with SHELXL-2018 using a full-matrix least squares procedure based on  $F^2$ . The weighted  $R$  factor,  $wR$  and goodness-of-fit  $S$  values were obtained based on  $F^2$ . The hydrogen atom positions were fixed geometrically at the calculated distances and allowed to ride on their parent atoms. Crystallographic data for the structure reported in this paper have been deposited at the Cambridge Crystallographic Data Center and allocated with the deposition numbers: CCDC 2278494 for compound **4ka**.



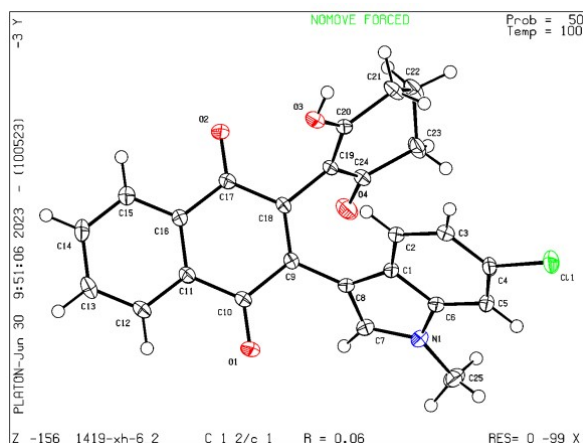

**Figure S19** ORTEP Drawing of **4ka** (The ellipsoids are shown at 50% probability levels)

**Table S22** Crystal data and structure refinement for **4ka**.

|                                    |                                                               |
|------------------------------------|---------------------------------------------------------------|
| Identification code                | 4ka                                                           |
| Empirical formula                  | C <sub>25</sub> H <sub>18</sub> ClNO <sub>4</sub>             |
| Formula weight                     | 431.85                                                        |
| Temperature/K                      | 99.98(18)                                                     |
| Crystal system                     | monoclinic                                                    |
| Space group                        | C2/c                                                          |
| a/Å                                | 26.1321(6)                                                    |
| b/Å                                | 7.0726(2)                                                     |
| c/Å                                | 21.8672(5)                                                    |
| α/°                                | 90                                                            |
| β/°                                | 98.900(2)                                                     |
| γ/°                                | 90                                                            |
| Volume/Å <sup>3</sup>              | 3992.88(17)                                                   |
| Z                                  | 8                                                             |
| ρ <sub>calc</sub> /cm <sup>3</sup> | 1.437                                                         |
| μ/mm <sup>-1</sup>                 | 1.981                                                         |
| F(000)                             | 1792.0                                                        |
| Crystal size/mm <sup>3</sup>       | 0.15 × 0.12 × 0.1                                             |
| Radiation                          | Cu Kα (λ = 1.54184)                                           |
| 2θ range for data collection/°     | 8.186 to 154.71                                               |
| Index ranges                       | -32 ≤ h ≤ 31, -3 ≤ k ≤ 8, -27 ≤ l ≤ 27                        |
| Reflections collected              | 13198                                                         |
| Independent reflections            | 4049 [R <sub>int</sub> = 0.0761, R <sub>sigma</sub> = 0.0433] |
| Data/restraints/parameters         | 4049/0/282                                                    |
| Goodness-of-fit on F <sup>2</sup>  | 1.156                                                         |
| Final R indexes [I ≥ 2σ (I)]       | R <sub>1</sub> = 0.0603, wR <sub>2</sub> = 0.1914             |

Final R indexes [all data]  $R_1 = 0.0643$ ,  $wR_2 = 0.1953$

Largest diff. peak/hole /  $e \text{ \AA}^{-3}$  0.56/-0.52

### Crystal structure determination of 4ka

**Crystal Data** for  $C_{25}H_{18}ClNO_4$  ( $M=431.85$  g/mol): monoclinic, space group C2/c (no. 15),  $a = 26.1321(6)$   $\text{\AA}$ ,  $b = 7.0726(2)$   $\text{\AA}$ ,  $c = 21.8672(5)$   $\text{\AA}$ ,  $\beta = 98.900(2)^\circ$ ,  $V = 3992.88(17)$   $\text{\AA}^3$ ,  $Z = 8$ ,  $T = 99.98(18)$  K,  $\mu(\text{Cu K}\alpha) = 1.981$   $\text{mm}^{-1}$ ,  $D_{\text{calc}} = 1.437$   $\text{g/cm}^3$ , 13198 reflections measured ( $8.186^\circ \leq 2\theta \leq 154.71^\circ$ ), 4049 unique ( $R_{\text{int}} = 0.0761$ ,  $R_{\text{sigma}} = 0.0433$ ) which were used in all calculations. The final  $R_1$  was 0.0603 ( $I > 2\sigma(I)$ ) and  $wR_2$  was 0.1953 (all data).

**Table S23 Fractional Atomic Coordinates ( $\times 10^4$ ) and Equivalent Isotropic Displacement Parameters ( $\text{\AA}^2 \times 10^3$ ) for 4ka.  $U_{\text{eq}}$  is defined as 1/3 of the trace of the orthogonalised  $U_{\text{IJ}}$  tensor.**

| Atom | <i>x</i>  | <i>y</i>  | <i>z</i>   | $U(\text{eq})$ |
|------|-----------|-----------|------------|----------------|
| Cl1  | 4456.2(2) | 9277.8(9) | 6726.5(2)  | 32.0(2)        |
| O1   | 6464.9(5) | 4491(2)   | 4660.0(6)  | 27.9(4)        |
| O2   | 7827.8(5) | 4967(2)   | 6744.7(6)  | 22.7(4)        |
| O3   | 7085.3(5) | 7740(2)   | 7172.7(6)  | 23.7(3)        |
| O4   | 6504.4(6) | 1585(2)   | 6708.2(6)  | 29.9(4)        |
| N1   | 5209.5(6) | 3699(3)   | 5600.3(7)  | 23.2(4)        |
| C1   | 5740.7(7) | 5994(3)   | 6059.4(8)  | 20.2(4)        |
| C2   | 5847.8(7) | 7708(3)   | 6364.8(8)  | 21.4(4)        |
| C3   | 5448.2(7) | 8708(3)   | 6562.3(8)  | 23.9(5)        |
| C4   | 4943.6(7) | 7971(3)   | 6457.7(8)  | 23.6(5)        |
| C5   | 4812.5(7) | 6305(3)   | 6148.5(8)  | 24.4(5)        |
| C6   | 5222.1(7) | 5313(3)   | 5949.3(8)  | 21.8(4)        |
| C7   | 5702.1(7) | 3335(3)   | 5481.4(8)  | 22.9(4)        |
| C8   | 6042.1(7) | 4670(3)   | 5759.3(8)  | 19.8(4)        |
| C9   | 6599.9(7) | 4749(3)   | 5752.7(8)  | 18.7(4)        |
| C10  | 6777.2(7) | 4690(3)   | 5132.7(8)  | 20.0(4)        |
| C11  | 7338.3(7) | 4937(3)   | 5109.0(8)  | 19.5(4)        |
| C12  | 7512.9(7) | 4943(3)   | 4540.1(8)  | 23.0(4)        |
| C13  | 8036.3(8) | 5197(3)   | 4507.1(9)  | 25.3(5)        |
| C14  | 8385.5(8) | 5442(3)   | 5052.3(10) | 26.1(5)        |
| C15  | 8217.2(7) | 5399(3)   | 5623.7(9)  | 23.6(5)        |
| C16  | 7692.3(7) | 5143(3)   | 5655.6(8)  | 19.5(4)        |
| C17  | 7511.7(7) | 5020(3)   | 6265.1(8)  | 19.6(4)        |
| C18  | 6948.7(7) | 4880(3)   | 6284.9(8)  | 17.9(4)        |
| C19  | 6780.7(7) | 4729(3)   | 6900.2(8)  | 19.4(4)        |

**Table S23 Fractional Atomic Coordinates ( $\times 10^4$ ) and Equivalent Isotropic Displacement Parameters ( $\text{\AA}^2 \times 10^3$ ) for 4ka.  $U_{\text{eq}}$  is defined as 1/3 of the trace of the orthogonalised  $U_{\text{IJ}}$  tensor.**

| Atom | $x$       | $y$     | $z$       | $U(\text{eq})$ |
|------|-----------|---------|-----------|----------------|
| C20  | 6854.1(7) | 6147(3) | 7317.5(8) | 20.1(4)        |
| C21  | 6657.6(8) | 6087(3) | 7928.9(8) | 27.5(5)        |
| C22  | 6551.4(9) | 4087(4) | 8129.1(9) | 31.2(5)        |
| C23  | 6245.1(8) | 2988(4) | 7601.2(9) | 29.9(5)        |
| C24  | 6517.5(7) | 2975(3) | 7035.3(8) | 22.4(4)        |
| C25  | 4758.8(7) | 2512(3) | 5416.3(9) | 28.4(5)        |

**Table S24 Anisotropic Displacement Parameters ( $\text{\AA}^2 \times 10^3$ ) for 4ka. The Anisotropic displacement factor exponent takes the form: -  $2\pi^2[\text{h}^2\text{a}^2U_{11}+2\text{hka}*\text{b}*U_{12}+\dots]$ .**

| Atom | $U_{11}$ | $U_{22}$ | $U_{33}$ | $U_{23}$ | $U_{13}$ | $U_{12}$ |
|------|----------|----------|----------|----------|----------|----------|
| C11  | 20.7(3)  | 50.4(4)  | 27.1(3)  | 0.0(2)   | 10.4(2)  | 8.1(2)   |
| O1   | 23.4(7)  | 46.9(10) | 12.6(6)  | 0.3(6)   | 0.6(5)   | -5.5(6)  |
| O2   | 18.0(7)  | 35.1(9)  | 14.2(6)  | 2.4(6)   | -0.1(5)  | 0.0(6)   |
| O3   | 25.7(7)  | 31.0(8)  | 14.7(6)  | -2.5(6)  | 3.7(5)   | -2.5(6)  |
| O4   | 37.1(8)  | 33.4(9)  | 20.8(7)  | -2.7(6)  | 9.4(6)   | -5.4(7)  |
| N1   | 14.9(7)  | 33.9(10) | 20.2(8)  | -1.1(7)  | 1.1(6)   | -2.7(7)  |
| C1   | 13.5(8)  | 33.9(12) | 13.2(8)  | 2.2(8)   | 1.5(6)   | -0.4(8)  |
| C2   | 16.1(8)  | 33.7(12) | 14.1(8)  | -1.0(8)  | 1.5(6)   | -0.1(8)  |
| C3   | 19.8(9)  | 36.9(13) | 15.0(8)  | -3.3(8)  | 2.2(6)   | -0.4(8)  |
| C4   | 15.5(8)  | 39.3(13) | 17.1(8)  | 2.8(8)   | 6.0(6)   | 5.3(8)   |
| C5   | 14.2(8)  | 41.4(13) | 17.8(8)  | 2.8(9)   | 3.7(6)   | -1.1(9)  |
| C6   | 16.1(9)  | 35.2(12) | 13.7(8)  | 1.5(8)   | 1.1(6)   | -1.6(8)  |
| C7   | 16.5(8)  | 34.1(12) | 17.5(8)  | 1.0(8)   | 0.5(6)   | 1.2(8)   |
| C8   | 15.1(9)  | 31.6(11) | 12.1(8)  | 0.5(7)   | -0.1(6)  | -0.7(8)  |
| C9   | 16.6(9)  | 25.8(11) | 14.3(8)  | -0.4(7)  | 4.4(6)   | -1.7(7)  |
| C10  | 19.4(9)  | 28.3(11) | 12.4(8)  | 0.6(7)   | 3.0(6)   | -0.2(8)  |
| C11  | 19.0(9)  | 25.8(11) | 14.1(8)  | 1.2(7)   | 3.7(7)   | 1.8(8)   |
| C12  | 24.9(10) | 31.6(12) | 13.2(8)  | 0.0(8)   | 4.9(7)   | 0.5(9)   |
| C13  | 28.3(10) | 30.0(12) | 20.5(9)  | 0.2(8)   | 13.0(8)  | 1.5(9)   |
| C14  | 18.0(9)  | 34.0(12) | 28.4(10) | -0.3(9)  | 10.5(7)  | 1.9(8)   |
| C15  | 18.1(9)  | 32.7(12) | 20.6(9)  | -1.0(8)  | 4.7(7)   | 1.5(8)   |
| C16  | 16.3(9)  | 27.1(11) | 15.4(9)  | 0.2(7)   | 3.6(7)   | 1.3(8)   |
| C17  | 18.5(9)  | 26.2(11) | 14.1(8)  | 0.4(7)   | 2.2(6)   | 1.6(8)   |
| C18  | 17.7(9)  | 24.4(11) | 12.5(8)  | -0.3(7)  | 4.8(6)   | 0.4(8)   |

**Table S24 Anisotropic Displacement Parameters ( $\text{\AA}^2 \times 10^3$ ) for 4ka. The Anisotropic displacement factor exponent takes the form: -  $2\pi^2[h^2a^{*2}U_{11}+2hka^*b^*U_{12}+\dots]$ .**

| Atom | $U_{11}$ | $U_{22}$ | $U_{33}$ | $U_{23}$ | $U_{13}$ | $U_{12}$ |
|------|----------|----------|----------|----------|----------|----------|
| C19  | 15.8(8)  | 31.7(11) | 10.7(8)  | 1.2(7)   | 2.4(6)   | 0.9(8)   |
| C20  | 15.1(8)  | 31.6(11) | 13.1(8)  | 1.0(8)   | 0.6(6)   | 2.1(8)   |
| C21  | 34.2(11) | 36.2(13) | 13.5(8)  | -3.1(8)  | 8.4(7)   | -0.5(9)  |
| C22  | 36.0(11) | 42.5(14) | 17.4(9)  | -0.2(9)  | 11.5(8)  | -3.1(10) |
| C23  | 30.5(10) | 42.2(14) | 19.9(9)  | -2.5(9)  | 13.0(7)  | -9.7(10) |
| C24  | 20.1(9)  | 34.5(12) | 12.9(8)  | 0.2(8)   | 3.5(6)   | -0.6(8)  |
| C25  | 19.8(9)  | 36.9(13) | 27.0(9)  | 1.6(9)   | -1.7(7)  | -7.1(9)  |

**Table S25 Bond Lengths for 4ka.**

| Atom Atom | Length/ $\text{\AA}$ | Atom Atom | Length/ $\text{\AA}$ |
|-----------|----------------------|-----------|----------------------|
| C11 C4    | 1.7475(19)           | C9 C18    | 1.366(2)             |
| O1 C10    | 1.222(2)             | C10 C11   | 1.486(2)             |
| O2 C17    | 1.231(2)             | C11 C12   | 1.390(2)             |
| O3 C20    | 1.340(2)             | C11 C16   | 1.401(2)             |
| O4 C24    | 1.213(3)             | C12 C13   | 1.393(3)             |
| N1 C6     | 1.371(3)             | C13 C14   | 1.395(3)             |
| N1 C7     | 1.376(2)             | C14 C15   | 1.388(3)             |
| N1 C25    | 1.451(2)             | C15 C16   | 1.396(3)             |
| C1 C2     | 1.391(3)             | C16 C17   | 1.484(2)             |
| C1 C6     | 1.423(3)             | C17 C18   | 1.482(2)             |
| C1 C8     | 1.445(3)             | C18 C19   | 1.482(2)             |
| C2 C3     | 1.385(3)             | C19 C20   | 1.349(3)             |
| C3 C4     | 1.403(3)             | C19 C24   | 1.470(3)             |
| C4 C5     | 1.375(3)             | C20 C21   | 1.505(2)             |
| C5 C6     | 1.404(3)             | C21 C22   | 1.519(3)             |
| C7 C8     | 1.372(3)             | C22 C23   | 1.514(3)             |
| C8 C9     | 1.461(3)             | C23 C24   | 1.520(2)             |
| C9 C10    | 1.500(2)             |           |                      |

**Table S26 Bond Angles for 4ka.**

| Atom Atom Atom | Angle/ $^\circ$ | Atom Atom Atom | Angle/ $^\circ$ |
|----------------|-----------------|----------------|-----------------|
| C6 N1 C7       | 108.56(16)      | C16 C11 C10    | 120.49(15)      |
| C6 N1 C25      | 125.77(16)      | C11 C12 C13    | 120.53(17)      |

**Table S26 Bond Angles for 4ka.**

| Atom | Atom | Atom | Angle/°    | Atom | Atom | Atom | Angle/°    |
|------|------|------|------------|------|------|------|------------|
| C7   | N1   | C25  | 125.59(19) | C12  | C13  | C14  | 119.29(16) |
| C2   | C1   | C6   | 119.45(17) | C15  | C14  | C13  | 120.68(17) |
| C2   | C1   | C8   | 134.36(17) | C14  | C15  | C16  | 119.90(18) |
| C6   | C1   | C8   | 106.00(17) | C11  | C16  | C17  | 120.04(16) |
| C3   | C2   | C1   | 119.29(17) | C15  | C16  | C11  | 119.67(16) |
| C2   | C3   | C4   | 119.6(2)   | C15  | C16  | C17  | 120.26(16) |
| C3   | C4   | C11  | 117.66(17) | O2   | C17  | C16  | 120.16(16) |
| C5   | C4   | C11  | 118.64(14) | O2   | C17  | C18  | 120.76(15) |
| C5   | C4   | C3   | 123.69(18) | C18  | C17  | C16  | 119.02(15) |
| C4   | C5   | C6   | 115.89(17) | C9   | C18  | C17  | 120.96(15) |
| N1   | C6   | C1   | 108.43(16) | C9   | C18  | C19  | 121.08(15) |
| N1   | C6   | C5   | 129.42(17) | C17  | C18  | C19  | 117.78(15) |
| C5   | C6   | C1   | 122.01(19) | C20  | C19  | C18  | 121.95(18) |
| C8   | C7   | N1   | 110.38(19) | C20  | C19  | C24  | 120.86(16) |
| C1   | C8   | C9   | 126.47(18) | C24  | C19  | C18  | 117.18(17) |
| C7   | C8   | C1   | 106.60(17) | O3   | C20  | C19  | 119.17(16) |
| C7   | C8   | C9   | 126.92(19) | O3   | C20  | C21  | 117.52(17) |
| C8   | C9   | C10  | 117.14(15) | C19  | C20  | C21  | 123.19(19) |
| C18  | C9   | C8   | 121.97(16) | C20  | C21  | C22  | 112.64(18) |
| C18  | C9   | C10  | 120.89(16) | C23  | C22  | C21  | 110.92(18) |
| O1   | C10  | C9   | 120.57(16) | C22  | C23  | C24  | 111.40(16) |
| O1   | C10  | C11  | 121.18(16) | O4   | C24  | C19  | 122.45(16) |
| C11  | C10  | C9   | 118.22(15) | O4   | C24  | C23  | 120.71(18) |
| C12  | C11  | C10  | 119.61(16) | C19  | C24  | C23  | 116.82(17) |
| C12  | C11  | C16  | 119.90(16) |      |      |      |            |

**Table S27 Torsion Angles for 4ka.**

| A   | B   | C   | D   | Angle/°     | A   | B   | C   | D   | Angle/°     |
|-----|-----|-----|-----|-------------|-----|-----|-----|-----|-------------|
| C11 | C4  | C5  | C6  | -179.44(14) | C10 | C9  | C18 | C17 | 1.7(3)      |
| O1  | C10 | C11 | C12 | 0.0(3)      | C10 | C9  | C18 | C19 | -173.24(19) |
| O1  | C10 | C11 | C16 | -179.3(2)   | C10 | C11 | C12 | C13 | 179.2(2)    |
| O2  | C17 | C18 | C9  | -173.4(2)   | C10 | C11 | C16 | C15 | -179.15(19) |
| O2  | C17 | C18 | C19 | 1.6(3)      | C10 | C11 | C16 | C17 | 3.0(3)      |
| O3  | C20 | C21 | C22 | -163.04(17) | C11 | C12 | C13 | C14 | 0.2(3)      |
| N1  | C7  | C8  | C1  | -1.7(2)     | C11 | C16 | C17 | O2  | 171.1(2)    |
| N1  | C7  | C8  | C9  | 178.56(18)  | C11 | C16 | C17 | C18 | -6.4(3)     |
| C1  | C2  | C3  | C4  | 0.6(3)      | C12 | C11 | C16 | C15 | 1.5(3)      |

**Table S27 Torsion Angles for 4ka.**

| A  | B   | C   | D   | Angle/°     | A   | B   | C   | D   | Angle/°     |
|----|-----|-----|-----|-------------|-----|-----|-----|-----|-------------|
| C1 | C8  | C9  | C10 | -126.3(2)   | C12 | C11 | C16 | C17 | -176.29(19) |
| C1 | C8  | C9  | C18 | 53.4(3)     | C12 | C13 | C14 | C15 | 1.2(3)      |
| C2 | C1  | C6  | N1  | 175.06(16)  | C13 | C14 | C15 | C16 | -1.2(3)     |
| C2 | C1  | C6  | C5  | -1.0(3)     | C14 | C15 | C16 | C11 | -0.2(3)     |
| C2 | C1  | C8  | C7  | -173.4(2)   | C14 | C15 | C16 | C17 | 177.6(2)    |
| C2 | C1  | C8  | C9  | 6.4(4)      | C15 | C16 | C17 | O2  | -6.7(3)     |
| C2 | C3  | C4  | C11 | 179.13(14)  | C15 | C16 | C17 | C18 | 175.84(19)  |
| C2 | C3  | C4  | C5  | -2.0(3)     | C16 | C11 | C12 | C13 | -1.5(3)     |
| C3 | C4  | C5  | C6  | 1.7(3)      | C16 | C17 | C18 | C9  | 4.0(3)      |
| C4 | C5  | C6  | N1  | -175.35(19) | C16 | C17 | C18 | C19 | 179.05(18)  |
| C4 | C5  | C6  | C1  | -0.2(3)     | C17 | C18 | C19 | C20 | 65.2(3)     |
| C6 | N1  | C7  | C8  | 1.3(2)      | C17 | C18 | C19 | C24 | -116.1(2)   |
| C6 | C1  | C2  | C3  | 0.8(3)      | C18 | C9  | C10 | O1  | 176.9(2)    |
| C6 | C1  | C8  | C7  | 1.4(2)      | C18 | C9  | C10 | C11 | -5.0(3)     |
| C6 | C1  | C8  | C9  | -178.83(18) | C18 | C19 | C20 | O3  | 0.0(3)      |
| C7 | N1  | C6  | C1  | -0.4(2)     | C18 | C19 | C20 | C21 | 175.92(17)  |
| C7 | N1  | C6  | C5  | 175.4(2)    | C18 | C19 | C24 | O4  | 11.2(3)     |
| C7 | C8  | C9  | C10 | 53.4(3)     | C18 | C19 | C24 | C23 | -167.20(16) |
| C7 | C8  | C9  | C18 | -126.9(2)   | C19 | C20 | C21 | C22 | 21.0(3)     |
| C8 | C1  | C2  | C3  | 175.0(2)    | C20 | C19 | C24 | O4  | -170.17(18) |
| C8 | C1  | C6  | N1  | -0.6(2)     | C20 | C19 | C24 | C23 | 11.4(3)     |
| C8 | C1  | C6  | C5  | -176.73(18) | C20 | C21 | C22 | C23 | -47.0(2)    |
| C8 | C9  | C10 | O1  | -3.4(3)     | C21 | C22 | C23 | C24 | 55.8(2)     |
| C8 | C9  | C10 | C11 | 174.75(18)  | C22 | C23 | C24 | O4  | 143.4(2)    |
| C8 | C9  | C18 | C17 | -178.0(2)   | C22 | C23 | C24 | C19 | -38.2(3)    |
| C8 | C9  | C18 | C19 | 7.0(3)      | C24 | C19 | C20 | O3  | -178.54(16) |
| C9 | C10 | C11 | C12 | -178.15(19) | C24 | C19 | C20 | C21 | -2.7(3)     |
| C9 | C10 | C11 | C16 | 2.5(3)      | C25 | N1  | C6  | C1  | 176.47(17)  |
| C9 | C18 | C19 | C20 | -119.7(2)   | C25 | N1  | C6  | C5  | -7.8(3)     |
| C9 | C18 | C19 | C24 | 58.9(3)     | C25 | N1  | C7  | C8  | -175.55(17) |

**Table S28 Hydrogen Atom Coordinates ( $\text{\AA} \times 10^4$ ) and Isotropic Displacement Parameters ( $\text{\AA}^2 \times 10^3$ ) for 4ka.**

| Atom | x       | y       | z       | U(eq) |
|------|---------|---------|---------|-------|
| H3   | 7116.42 | 8485.01 | 7475.4  | 36    |
| H2   | 6191.5  | 8187.12 | 6436.91 | 26    |
| H3A  | 5515.18 | 9886.24 | 6767.67 | 29    |

**Table S28 Hydrogen Atom Coordinates ( $\text{\AA}\times 10^4$ ) and Isotropic Displacement Parameters ( $\text{\AA}^2\times 10^3$ ) for 4ka.**

| <b>Atom</b> | <b><i>x</i></b> | <b><i>y</i></b> | <b><i>z</i></b> | <b>U(eq)</b> |
|-------------|-----------------|-----------------|-----------------|--------------|
| H5          | 4466.09         | 5852.8          | 6074.34         | 29           |
| H7          | 5793.69         | 2305.89         | 5241.04         | 28           |
| H12         | 7273.24         | 4772.51         | 4170.79         | 28           |
| H13         | 8154.49         | 5204.51         | 4117.47         | 30           |
| H14         | 8742.03         | 5639.94         | 5032.09         | 31           |
| H15         | 8458.88         | 5543.13         | 5992.65         | 28           |
| H21A        | 6334.47         | 6835.8          | 7896.83         | 33           |
| H21B        | 6916.94         | 6680.92         | 8249.39         | 33           |
| H22A        | 6883.89         | 3434.63         | 8270.02         | 37           |
| H22B        | 6354.68         | 4133.74         | 8481.04         | 37           |
| H23A        | 5897.71         | 3563.45         | 7490.86         | 36           |
| H23B        | 6198.4          | 1671.02         | 7735.77         | 36           |
| H25A        | 4705.55         | 1694.03         | 5762.66         | 43           |
| H25B        | 4813.89         | 1730.33         | 5062.21         | 43           |
| H25C        | 4452.82         | 3310.6          | 5299.78         | 43           |

#### 4. Characterization of compounds

##### 5-methyl-5*H*-spiro[benzo[5,6]indeno[2,1-*b*]indole-6,1'-cyclohexane]-2',6',7,12-tetraone (3aa)

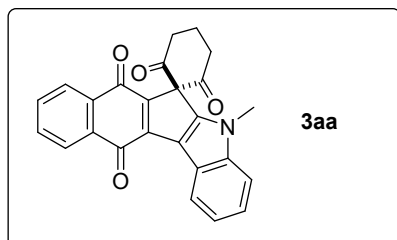

Blue solid, m.p. 233-224 °C, yield: 30.8 mg, 78% yield; Rf: 0.51 (EA:PE =1:2). <sup>1</sup>H NMR (400 MHz, CDCl<sub>3</sub>) δ 8.41 (d, *J* = 5.2 Hz, 1H), 8.17 (d, *J* = 7.5 Hz, 1H), 8.09 (d, *J* = 7.5 Hz, 1H), 7.72 (dt, *J* = 22.2, 7.4 Hz, 2H), 7.36 (d, *J* = 9.1 Hz, 3H), 3.96 (td, *J* = 14.7, 6.1 Hz, 2H), 3.64 (s, 3H), 2.88 (d, *J* = 15.8 Hz, 2H), 2.61 (d, *J* = 14.0 Hz, 1H), 2.03 (q, *J* = 13.8 Hz, 1H). <sup>13</sup>C NMR (101 MHz, CDCl<sub>3</sub>) 202.6, 182.8, 178.7, 156.9, 150.5, 143.0, 136.7, 134.2, 134.1, 132.7, 132.0, 126.4, 126.3, 124.1, 123.1, 122.7, 122.0, 120.1, 110.6, 77.8, 38.9, 32.2, 18.5. HRMS (ESI) Calcd for C<sub>25</sub>H<sub>17</sub>NNaO<sub>4</sub><sup>+</sup>[M+Na]<sup>+</sup>: 418.1055, Found: 418.1058.

##### 1,5-dimethyl-5*H*-spiro[benzo[5,6]indeno[2,1-*b*]indole-6,1'-cyclohexane]-2',6',7,12-tetraone (3ba)

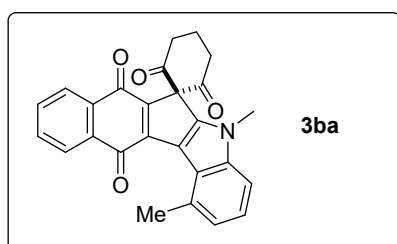

Blue solid, m.p. 242-243 °C, yield: 26.6 mg, 65% yield; Rf: 0.26 (EA:PE =1:2). <sup>1</sup>H NMR (400 MHz, CDCl<sub>3</sub>) δ 8.11 (d, *J* = 8.0 Hz, 1H), 8.03 (d, *J* = 7.6 Hz, 1H), 7.70 (t, *J* = 6.2 Hz, 2H), 7.23 (s, 1H), 7.19 (d, *J* = 8.0 Hz, 1H), 7.12 (d, *J* = 7.2 Hz, 1H), 3.89 (dt, *J* = 15.2, 7.4 Hz, 2H), 3.61 (s, 3H), 2.97 (s, 3H), 2.92 (s, 2H), 2.63 (d, *J* = 20.8 Hz, 1H), 2.10 (q, *J* = 14.7, 14.1 Hz, 1H). <sup>13</sup>C NMR (101 MHz, CDCl<sub>3</sub>) 203.2, 182.5, 179.0, 157.1,



152.1, 142.9, 140.1, 134.0, 133.7, 133.1, 133.0, 132.9, 126.7, 125.6, 124.8, 123.9, 122.3, 118.6, 108.1, 75.3, 38.9, 32.2, 23.1, 18.3. HRMS (ESI) Calcd for  $C_{26}H_{19}NNaO_4^+[M+Na]^+$ : 432.1212, Found: 432.1214.

**2-methoxy-5-methyl-5*H*-spiro[benzo[5,6]indeno[2,1-*b*]indole-6,1'-cyclohexane]-2',6',7,12-tetraone (3ea)**

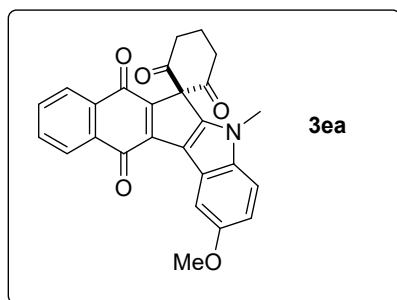

Blue solid, m.p. 242-243 °C, yield: 12.8 mg, 30% yield; Rf: 0.26 (EA:PE =1:2).  $^1H$  NMR (400 MHz,  $CDCl_3$ )  $\delta$  8.16 (d,  $J = 8.2$  Hz, 1H), 8.09 (d,  $J = 7.0$  Hz, 1H), 7.91 (s, 1H), 7.75 (t,  $J = 6.8$  Hz, 1H), 7.72 – 7.66 (m, 1H), 7.27 (s, 1H), 6.99 (dd,  $J = 9.8, 1.9$  Hz, 1H), 3.98 (s, 3H), 3.93 (dd,  $J = 14.4, 6.3$  Hz, 2H), 3.60 (s, 3H), 2.88 (d,  $J = 15.6$  Hz, 2H), 2.65 – 2.55 (m, 1H), 2.01 (q,  $J = 13.9$  Hz, 1H).  $^{13}C$  NMR (101 MHz,  $CDCl_3$ ) 202.8, 183.0, 178.5, 156.9, 156.5, 150.5, 137.9, 136.2, 134.2, 132.7, 132.1, 126.3, 122.8, 119.8, 114.1, 111.4, 110.8, 104.9, 77.7, 56.0, 38.9, 32.3, 18.5. HRMS (ESI) Calcd for  $C_{26}H_{19}NNaO_5^+[M+Na]^+$ : 448.1161, Found: 448.1154.

**2,5-dimethyl-5*H*-spiro[benzo[5,6]indeno[2,1-*b*]indole-6,1'-cyclohexane]-2',6',7,12-tetraone (3fa)**

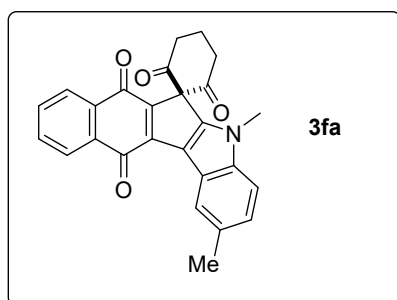

Blue solid, m.p. 232-233 °C, yield: 28.7 mg, 70% yield; Rf: 0.29 (EA:PE =1:2).  $^1H$  NMR (400 MHz,  $CDCl_3$ )  $\delta$  8.20 (s, 1H), 8.16 (d,  $J = 7.4$  Hz, 1H), 8.09 (d,  $J = 7.4$  Hz,

1H), 7.72 (dt,  $J = 21.8, 7.3$  Hz, 2H), 7.25 (s, 1H), 7.19 (d,  $J = 8.4$  Hz, 1H), 3.94 (dt,  $J = 14.5, 7.3$  Hz, 2H), 3.59 (s, 3H), 2.87 (d,  $J = 15.7$  Hz, 2H), 2.64 – 2.57 (m, 1H), 2.54 (s, 3H), 2.02 (q,  $J = 13.8$  Hz, 1H).  $^{13}\text{C}$  NMR (101 MHz,  $\text{CDCl}_3$ ) 202.7, 183.0, 178.5, 157.0, 150.5, 141.4, 136.4, 134.2, 132.6, 132.5, 132.0, 126.3, 126.2, 125.5, 122.9, 122.2, 119.6, 110.2, 77.7, 38.9, 32.2, 21.5, 18.5. HRMS (ESI) Calcd for  $\text{C}_{26}\text{H}_{19}\text{NNaO}_4^+[\text{M}+\text{Na}]^+$ : 432.1212, Found: 432.1219.

**2-chloro-5-methyl-5*H*-spiro[benzo[5,6]indeno[2,1-*b*]indole-6,1'-cyclohexane]-2',6',7,12-tetraone (3ga)**

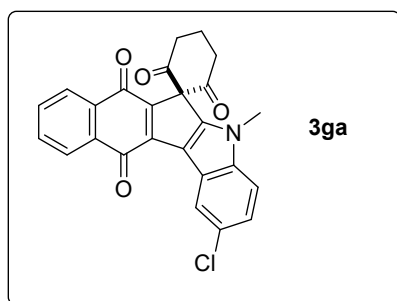

Purple solid, m.p. 250-251 °C, yield: 30.9 mg, 72% yield; Rf: 0.20 (EA:PE =1:2).  $^1\text{H}$  NMR (400 MHz,  $\text{CDCl}_3$ )  $\delta$  8.40 (s, 1H), 8.16 (d,  $J = 6.9$  Hz, 1H), 8.09 (d,  $J = 7.4$  Hz, 1H), 7.80 – 7.67 (m, 2H), 7.36 – 7.26 (m, 2H), 3.94 (dt,  $J = 14.8, 7.2$  Hz, 2H), 3.62 (s, 3H), 2.89 (d,  $J = 15.6$  Hz, 2H), 2.67 – 2.55 (m, 1H), 2.10 – 1.93 (m, 1H).  $^{13}\text{C}$  NMR (101 MHz,  $\text{CDCl}_3$ ) 202.3, 182.6, 178.9, 157.1, 150.0, 141.2, 137.1, 134.3, 133.9, 132.9, 131.9, 128.6, 126.4, 126.4, 124.2, 122.9, 122.6, 119.3, 111.5, 78.1, 77.3, 77.0, 76.7, 38.8, 32.3, 18.5. HRMS (ESI) Calcd for  $\text{C}_{25}\text{H}_{16}\text{ClNNaO}_4^+[\text{M}+\text{Na}]^+$ : 452.0666, Found: 452.0661.

**2-bromo-5-methyl-5*H*-spiro[benzo[5,6]indeno[2,1-*b*]indole-6,1'-cyclohexane]-2',6',7,12-tetraone (3ha)**

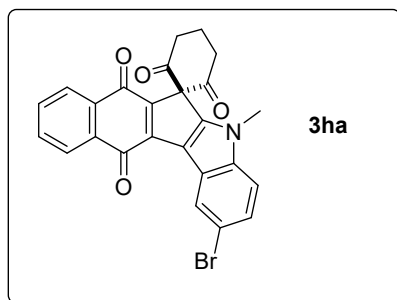

Purple solid, m.p. 254-255 °C, yield: 20.4 mg, 43% yield; Rf: 0.20 (EA:PE =1:2). <sup>1</sup>H NMR (400 MHz, CDCl<sub>3</sub>) δ 8.55 (d, *J* = 1.9 Hz, 1H), 8.16 (d, *J* = 8.7 Hz, 1H), 8.09 (d, *J* = 9.0 Hz, 1H), 7.73 (dt, *J* = 18.3, 7.4 Hz, 2H), 7.46 (d, *J* = 8.7 Hz, 1H), 7.23 (s, 1H), 3.94 (td, *J* = 14.7, 6.1 Hz, 2H), 3.61 (s, 3H), 2.88 (d, *J* = 15.5 Hz, 2H), 2.61 (t, *J* = 7.1 Hz, 1H), 2.10 – 1.93 (m, 1H). <sup>13</sup>C NMR (101 MHz, CDCl<sub>3</sub>) 202.3, 182.6, 179.0, 157.0, 150.0, 141.6, 137.2, 134.3, 133.9, 133.0, 132.0, 126.9, 126.4, 125.6, 123.4, 119.3, 116.2, 112.0, 78.1, 38.9, 32.3, 18.5. HRMS (ESI) Calcd for C<sub>25</sub>H<sub>16</sub>BrNNaO<sub>4</sub><sup>+</sup> [M+Na]<sup>+</sup>: 496.0160, Found: 496.0158.

**3-methoxy-5-methyl-5*H*-spiro[benzo[5,6]indeno[2,1-*b*]indole-6,1'-cyclohexane]-2',6',7,12-tetraone (3ia)**

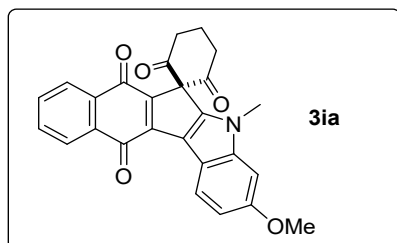

Blue solid, m.p. 229-230 °C, yield: 20.0 mg, 47% yield; Rf: 0.19 (EA:PE =1:2). <sup>1</sup>H NMR (400 MHz, CDCl<sub>3</sub>) δ 8.27 (d, *J* = 8.7 Hz, 1H), 8.14 (d, *J* = 7.5 Hz, 1H), 8.08 (d, *J* = 7.6 Hz, 1H), 7.76 – 7.63 (m, 2H), 6.98 (d, *J* = 8.7 Hz, 1H), 6.84 (s, 1H), 3.97 (dt, *J* = 14.7, 7.2 Hz, 2H), 3.91 (s, 3H), 3.58 (s, 3H), 2.87 (d, *J* = 15.5 Hz, 2H), 2.66 – 2.54 (m, 1H), 2.01 (q, *J* = 13.5 Hz, 1H). <sup>13</sup>C NMR (101 MHz, CDCl<sub>3</sub>) 202.7, 182.9, 178.4, 157.9, 156.5, 150.3, 144.1, 136.2, 134.3, 134.1, 132.6, 132.0, 126.3, 126.2, 123.9, 120.2, 116.1, 111.4, 95.1, 77.9, 55.8, 38.8, 32.2, 18.5. HRMS (ESI) Calcd for C<sub>26</sub>H<sub>19</sub>NNaO<sub>5</sub><sup>+</sup> [M+Na]<sup>+</sup>: 448.1161, Found: 448.1154.

**3-fluoro-5-methyl-5*H*-spiro[benzo[5,6]indeno[2,1-*b*]indole-6,1'-cyclohexane]-  
2',6',7,12-tetraone (3ja)**

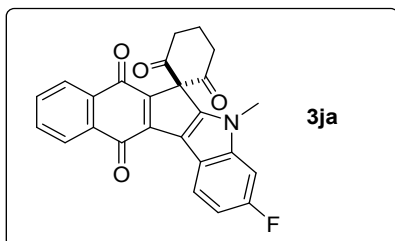

Blue solid, m.p. 240-241 °C, yield: 38.0 mg, 92% yield; Rf: 0.60 (EA:PE =1:2). <sup>1</sup>H NMR (400 MHz, CDCl<sub>3</sub>) δ 8.36 – 8.29 (m, 1H), 8.13 (d, *J* = 7.4 Hz, 1H), 8.08 (d, *J* = 7.5 Hz, 1H), 7.71 (dt, *J* = 20.5, 7.4 Hz, 2H), 7.09 (q, *J* = 8.0, 7.3 Hz, 2H), 3.94 (dd, *J* = 29.4, 6.0 Hz, 2H), 3.58 (s, 3H), 2.88 (d, *J* = 15.6 Hz, 2H), 2.58 (s, 1H), 2.01 (q, *J* = 15.2, 14.5 Hz, 1H). <sup>13</sup>C NMR (101 MHz, CDCl<sub>3</sub>) 202.4, 182.7, 178.8, 160.8 (d, *J* = 242.0 Hz), 156.8, 150.1, 143.2, 143.1, 137.1, 134.2, 134.0, 132.8, 131.9, 126.4, 126.3, 124.1 (d, *J* = 10.0 Hz), 120.0, 118.4, 111.0 (d, *J* = 24.0 Hz), 97.8, 97.5, 78.1, 38.8, 32.3, 18.5. <sup>19</sup>F NMR (376 MHz, CDCl<sub>3</sub>) δ -116.59. HRMS (ESI) Calcd for C<sub>25</sub>H<sub>16</sub>FNNaO<sub>4</sub><sup>+</sup> [M+Na]<sup>+</sup>: 436.0961, Found: 436.0956.

**3-chloro-5-methyl-5*H*-spiro[benzo[5,6]indeno[2,1-*b*]indole-6,1'-cyclohexane]-  
2',6',7,12-tetraone (3ka)**

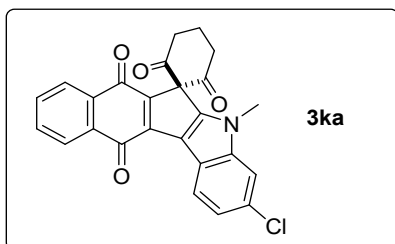

Purple solid, m.p. 229-230 °C, yield: 30.0 mg, 70% yield; Rf: 0.26 (EA:PE =1:2). <sup>1</sup>H NMR (400 MHz, CDCl<sub>3</sub>) δ 8.30 (d, *J* = 8.5 Hz, 1H), 8.11 (dd, *J* = 21.0, 7.8 Hz, 2H), 7.80 – 7.66 (m, 2H), 7.38 (s, 1H), 7.31 (d, *J* = 8.7 Hz, 1H), 3.94 (td, *J* = 14.6, 5.9 Hz, 2H), 3.60 (s, 3H), 2.88 (d, *J* = 16.2 Hz, 2H), 2.61 (d, *J* = 12.0 Hz, 1H), 2.01 (q, *J* = 13.6 Hz, 1H). <sup>13</sup>C NMR (101 MHz, CDCl<sub>3</sub>) 202.3, 182.6, 178.9, 156.9, 150.0, 143.2, 137.3,

134.2, 133.9, 132.9, 131.9, 130.0, 126.4, 123.8, 123.2, 120.5, 119.9, 110.9, 78.1, 77.3, 77.0, 76.7, 38.8, 32.3, 18.5. HRMS (ESI) Calcd for  $C_{25}H_{16}ClNNaO_4^+$   $[M+Na]^+$ : 452.0666, Found: 452.0661.

**3-bromo-5-methyl-5*H*-spiro[benzo[5,6]indeno[2,1-*b*]indole-6,1'-cyclohexane]-2',6',7,12-tetraone (3la)**

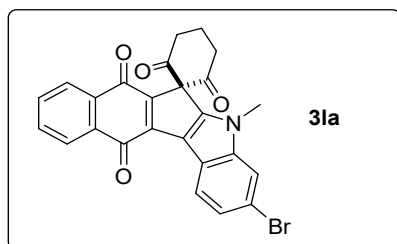

Purple solid, m.p. 239-240 °C, yield: 36.0 mg, 76% yield; Rf: 0.27 (EA:PE =1:2).  $^1H$  NMR (400 MHz,  $CDCl_3$ )  $\delta$  8.24 (d,  $J = 8.5$  Hz, 1H), 8.13 (d,  $J = 9.0$  Hz, 1H), 8.08 (d,  $J = 7.5$  Hz, 1H), 7.79 – 7.65 (m, 2H), 7.54 (s, 1H), 7.45 (d,  $J = 8.4$  Hz, 1H), 3.94 (td,  $J = 14.4, 6.1$  Hz, 2H), 3.60 (s, 3H), 2.88 (d,  $J = 15.6$  Hz, 2H), 2.64 – 2.54 (m, 1H), 2.09 – 1.92 (m, 1H).  $^{13}C$  NMR (101 MHz,  $CDCl_3$ ) 202.3, 182.6, 178.9, 156.8, 150.0, 143.5, 137.4, 134.3, 134.0, 132.9, 132.0, 126.4, 125.8, 124.2, 120.8, 119.9, 117.5, 113.8, 78.1, 38.8, 32.3, 18.5. HRMS (ESI) Calcd for  $C_{25}H_{16}BrNNaO_4^+$   $[M+Na]^+$ : 496.0160, Found: 496.0157.

**4,5-dimethyl-5*H*-spiro[benzo[5,6]indeno[2,1-*b*]indole-6,1'-cyclohexane]-2',6',7,12-tetraone (3ma)**

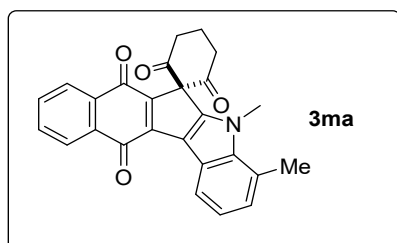

Blue solid, m.p. 249-250 °C, yield: 25.8 mg, 63% yield; Rf: 0.24 (EA:PE =1:2).  $^1H$  NMR (400 MHz,  $CDCl_3$ )  $\delta$  8.30 (d,  $J = 7.9$  Hz, 1H), 8.14 (d,  $J = 7.3$  Hz, 1H), 8.08 (d,  $J = 6.1$  Hz, 1H), 7.75 – 7.64 (m, 2H), 7.20 (t,  $J = 7.6$  Hz, 1H), 7.05 (d,  $J = 7.2$  Hz, 1H),

3.96 (td,  $J = 14.9, 6.1$  Hz, 2H), 3.85 (s, 3H), 2.88 (d,  $J = 15.7$  Hz, 2H), 2.77 (s, 3H), 2.59 (d,  $J = 11.5$  Hz, 1H), 2.02 (q,  $J = 14.0$  Hz, 1H).  $^{13}\text{C}$  NMR (101 MHz,  $\text{CDCl}_3$ ) 202.9, 182.8, 178.6, 157.8, 150.5, 141.5, 136.7, 134.1, 134.0, 132.7, 132.0, 127.4, 126.4, 126.2, 123.0, 122.9, 122.5, 121.4, 120.0, 78.5, 38.8, 36.3, 19.7, 18.4. HRMS (ESI) Calcd for  $\text{C}_{26}\text{H}_{19}\text{NNaO}_4^+[\text{M}+\text{Na}]^+$ : 432.1212, Found: 432.1219.

**5-allyl-5H-spiro[benzo[5,6]indeno[2,1-b]indole-6,1'-cyclohexane]-2',6',7,12-tetraone (3pa)**

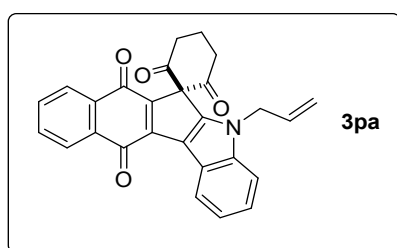

Blue solid, m.p. 211-212°C, yield: 30.8 mg, 73% yield; Rf: 0.40 (EA:PE =1:2).  $^1\text{H}$  NMR (400 MHz,  $\text{CDCl}_3$ )  $\delta$  8.43 (d,  $J = 7.1$  Hz, 1H), 8.16 (d,  $J = 7.2$  Hz, 1H), 8.07 (d,  $J = 7.4$  Hz, 1H), 7.78 – 7.63 (m, 2H), 7.42 – 7.29 (m, 3H), 5.86 (ddt,  $J = 16.0, 10.5, 5.4$  Hz, 1H), 4.59 (d,  $J = 5.3$  Hz, 2H), 3.95 – 3.74 (m, 2H), 2.85 (d,  $J = 16.0$  Hz, 2H), 2.57 (dd,  $J = 10.5, 3.8$  Hz, 1H), 2.03 (q,  $J = 13.6$  Hz, 1H).  $^{13}\text{C}$  NMR (101 MHz,  $\text{CDCl}_3$ ) 202.8, 182.7, 178.8, 156.1, 150.3, 142.3, 138.8, 134.1, 133.9, 132.8, 132.1, 131.4, 126.4, 126.2, 124.1, 123.2, 122.7, 122.2, 120.7, 119.1, 111.3, 48.9, 38.8, 18.1. HRMS (ESI) Calcd for  $\text{C}_{27}\text{H}_{19}\text{NNaO}_4^+[\text{M}+\text{Na}]^+$ : 444.1212, Found: 444.1208.

**5-(prop-2-yn-1-yl)-5H-spiro[benzo[5,6]indeno[2,1-b]indole-6,1'-cyclohexane]-2',6',7,12-tetraone (3qa)**

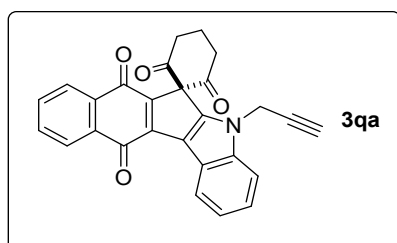

Blue solid, m.p. 206-207°C, yield: 20.5 mg, 49% yield; Rf: 0.58 (EA:PE =1:2). <sup>1</sup>H NMR (400 MHz, CDCl<sub>3</sub>) δ 8.44 (d, *J* = 7.7 Hz, 1H), 8.17 (d, *J* = 7.4 Hz, 1H), 8.08 (d, *J* = 7.4 Hz, 1H), 7.80 – 7.67 (m, 2H), 7.48 (d, *J* = 7.0 Hz, 1H), 7.44 – 7.35 (m, 2H), 4.75 (d, *J* = 2.3 Hz, 2H), 3.95 – 3.81 (m, 2H), 2.91 (d, *J* = 15.9 Hz, 2H), 2.64 – 2.54 (m, 1H), 2.44 (s, 1H), 2.18 (q, *J* = 13.7 Hz, 1H). <sup>13</sup>C NMR (101 MHz, CDCl<sub>3</sub>) 202.4, 182.6, 179.0, 150.0, 141.9, 139.0, 134.2, 133.8, 132.9, 132.1, 126.4, 126.3, 124.4, 123.3, 122.9, 122.0, 121.6, 110.7, 75.2, 38.8, 35.1, 18.4. HRMS (ESI) Calcd for C<sub>27</sub>H<sub>17</sub>NNaO<sub>4</sub><sup>+</sup>[M+Na]<sup>+</sup>: 442.1055, Found: 442.1054.

**5-benzyl-5*H*-spiro[benzo[5,6]indeno[2,1-*b*]indole-6,1'-cyclohexane]-2',6',7,12-tetraone (3ra)**

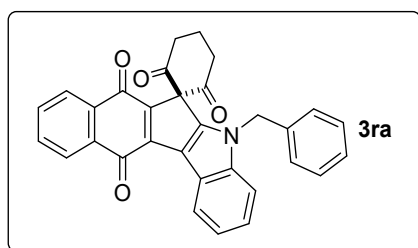

Blue solid, m.p. 195-200°C, yield: 27.3 mg, 58% yield; Rf: 0.50 (EA:PE =1:2). <sup>1</sup>H NMR (400 MHz, CDCl<sub>3</sub>) δ 8.45 (d, *J* = 7.9 Hz, 1H), 8.17 (d, *J* = 5.5 Hz, 1H), 8.06 (d, *J* = 7.3 Hz, 1H), 7.71 (p, *J* = 7.5 Hz, 2H), 7.37 – 7.27 (m, 4H), 7.22 (d, *J* = 7.1 Hz, 1H), 7.14 (t, *J* = 7.8 Hz, 3H), 5.19 (s, 2H), 3.77 – 3.64 (m, 2H), 2.65 (dt, *J* = 16.1, 4.1 Hz, 2H), 2.53 – 2.40 (m, 1H), 1.83 (qt, *J* = 13.3, 4.3 Hz, 1H). <sup>13</sup>C NMR (101 MHz, CDCl<sub>3</sub>) 202.7, 182.7, 178.8, 156.4, 150.3, 142.6, 139.6, 134.7, 134.1, 133.9, 132.8, 132.1, 129.0, 128.3, 126.8, 126.4, 126.2, 124.2, 123.1, 122.8, 122.3, 121.1, 111.6, 50.2, 38.7, 18.1. HRMS (ESI) Calcd for C<sub>31</sub>H<sub>21</sub>NNaO<sub>4</sub><sup>+</sup>[M+Na]<sup>+</sup>: 494.1368, Found: 494.1370.

**5-acetyl-5*H*-spiro[benzo[5,6]indeno[2,1-*b*]indole-6,1'-cyclohexane]-2',6',7,12-tetraone (3sa)**

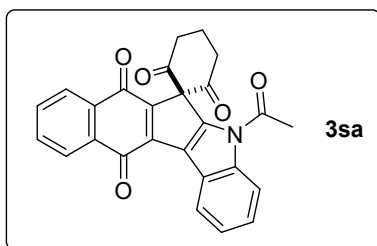

Pink solid, m.p. 252-253°C, yield: 16.1 mg, 38% yield; Rf: 0.50 (EA:PE =1:2).  $^1\text{H}$  NMR (400 MHz,  $\text{CDCl}_3$ )  $\delta$  8.62 – 8.41 (m, 1H), 8.30 – 8.14 (m, 1H), 8.13 – 8.02 (m, 1H), 7.87 – 7.73 (m, 2H), 7.73 – 7.65 (m, 1H), 7.51 – 7.40 (m, 2H), 3.61 (ddd,  $J$  = 16.4, 12.8, 6.4 Hz, 2H), 2.89 (dt,  $J$  = 16.5, 3.9 Hz, 2H), 2.82 (s, 3H), 2.63 (dt,  $J$  = 13.1, 4.3 Hz, 1H), 2.48 – 2.36 (m, 1H), 2.17 (s, 3H).  $^{13}\text{C}$  NMR (101 MHz,  $\text{CDCl}_3$ ) 202.1, 182.0, 180.4, 168.0, 152.8, 148.1, 143.9, 139.1, 134.2, 133.5, 133.3, 132.2, 127.8, 126.6, 126.5, 126.0, 124.9, 124.2, 124.0, 114.4, 79.0, 38.5, 25.8, 17.4. HRMS (ESI) Calcd for  $\text{C}_{26}\text{H}_{17}\text{NNaO}_5^+[\text{M}+\text{Na}]^+$ : 446.1004, Found: 446.1000.

**5,9,10-trimethyl-5*H*-spiro[benzo[5,6]indeno[2,1-*b*]indole-6,1'-cyclohexane]-2',6',7,12-tetraone (3ta)**

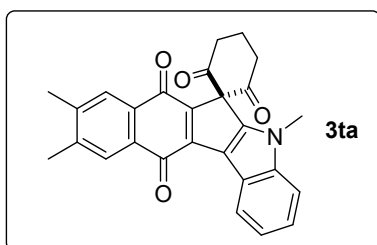

Blue solid, m.p. 232-233°C, yield: 20.7 mg, 49% yield; Rf: 0.25 (EA:PE =1:2).  $^1\text{H}$  NMR (400 MHz,  $\text{CDCl}_3$ )  $\delta$  8.43 – 8.36 (m, 1H), 7.89 (s, 1H), 7.82 (s, 1H), 7.36 (dd,  $J$  = 8.3, 2.3 Hz, 3H), 4.03 – 3.89 (m, 2H), 3.63 (s, 3H), 2.87 (d,  $J$  = 15.6 Hz, 2H), 2.59 (d,  $J$  = 10.9 Hz, 1H), 2.40 (s, 6H), 2.10 – 1.93 (m, 1H).  $^{13}\text{C}$  NMR (101 MHz,  $\text{CDCl}_3$ ) 202.8, 183.0, 179.2, 156.6, 150.5, 143.9, 142.9, 142.3, 136.7, 132.0, 130.1, 127.6, 127.5, 123.9, 123.2, 122.6, 122.1, 120.1, 110.5, 77.8, 38.9, 32.1, 20.3, 20.0, 18.5. HRMS (ESI) Calcd for  $\text{C}_{27}\text{H}_{21}\text{NNaO}_4^+[\text{M}+\text{Na}]^+$ : 446.1368, Found: 446.1366.



**9,10-dibromo-5-methyl-5H-spiro[benzo[5,6]indeno[2,1-*b*]indole-6,1'-cyclohexane]-2',6',7,12-tetraone (3ua)**

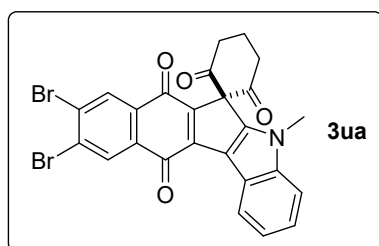

Blue solid, m.p. 228-229°C, yield: 28.8 mg, 52% yield; Rf: 0.31 (EA:PE =1:2). <sup>1</sup>H NMR (400 MHz, CDCl<sub>3</sub>) δ 8.35 (s, 2H), 8.31 (s, 1H), 7.46 – 7.29 (m, 3H), 3.91 (td, J = 14.7, 6.1 Hz, 2H), 3.64 (s, 3H), 2.89 (dt, J = 15.6, 3.7 Hz, 2H), 2.66 – 2.55 (m, 1H), 2.10 – 1.95 (m, 1H). <sup>13</sup>C NMR (101 MHz, CDCl<sub>3</sub>) 202.1, 181.2, 176.5, 158.7, 148.9, 143.2, 135.9, 133.6, 132.1, 131.7, 131.4, 130.2, 124.5, 123.2, 123.1, 121.9, 110.7, 77.2, 38.8, 32.3, 18.5. HRMS (ESI) Calcd for C<sub>25</sub>H<sub>15</sub>Br<sub>2</sub>NNaO<sub>4</sub><sup>+</sup>[M+Na]<sup>+</sup>: 573.9266, Found: 573.9262.

**6,6-diacetyl-5-methyl-5,6-dihydrobenzo[5,6]indeno[2,1-*b*]indole-7,12-dione (3ab)**

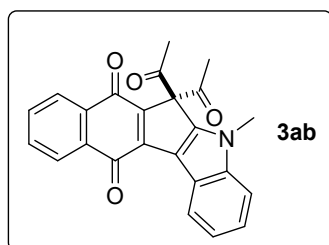

Blue solid, m.p. 192-193°C, yield: 15.3mg, 40% yield; Rf: 0.49 (EA:PE =1:2). <sup>1</sup>H NMR (400 MHz, CDCl<sub>3</sub>) δ 8.48 – 8.41 (m, 1H), 8.20 (dd, J = 17.3, 7.5 Hz, 2H), 7.83 – 7.72 (m, 2H), 7.42 (d, J = 8.0 Hz, 3H), 3.82 (s, 3H), 2.29 (s, 6H). <sup>13</sup>C NMR (101 MHz, CDCl<sub>3</sub>) 198.8, 182.9, 179.5, 150.9, 150.0, 143.7, 134.5, 134.3, 134.1, 132.9, 132.3, 127.8, 126.5, 124.4, 122.9, 122.8, 121.6, 119.3, 110.9, 79.5, 32.1, 28.4. HRMS (ESI) Calcd for C<sub>24</sub>H<sub>17</sub>NNaO<sub>4</sub><sup>+</sup>[M+Na]<sup>+</sup>: 406.1055, Found: 406.1052.

**5-methyl-5H-spiro[benzo[5,6]indeno[2,1-*b*]indole-6,1'-cyclopentane]-2',5',7,12-tetraone (3ac)**

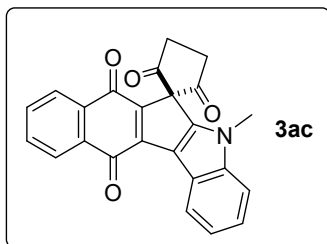

Blue solid, m.p. 241-242°C, yield: 25.9 mg, 68% yield; Rf: 0.20 (EA:PE =1:2). <sup>1</sup>H NMR (400 MHz, CDCl<sub>3</sub>) δ 8.36 (s, 1H), 8.18 (d, *J* = 7.3 Hz, 1H), 8.03 (d, *J* = 6.6 Hz, 1H), 7.76 – 7.68 (m, 2H), 7.36 (s, 3H), 3.88 – 3.80 (m, 2H), 3.66 (s, 3H), 3.19 – 3.10 (m, 2H). <sup>13</sup>C NMR (101 MHz, CDCl<sub>3</sub>) 206.7, 179.1, 153.2, 149.2, 142.5, 136.2, 134.0, 133.2, 133.1, 132.5, 126.7, 126.1, 124.7, 124.2, 122.9, 122.6, 122.0, 121.5, 110.5, 38.3, 32.2. HRMS (ESI) Calcd for C<sub>24</sub>H<sub>15</sub>NNaO<sub>4</sub><sup>+</sup>[M+Na]<sup>+</sup>: 404.0899, Found: 404.0890.

**4',5-dimethyl-5*H*-spiro[benzo[5,6]indeno[2,1-*b*]indole-6,1'-cyclohexane]-2',6',7,12-tetraone (3ad)**

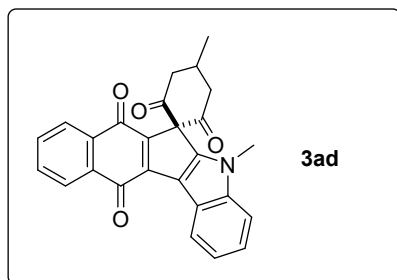

Blue solid, m.p. 241-242°C, yield: 32.3 mg, 79% yield; Rf: 0.49 (EA:PE =1:2). <sup>1</sup>H NMR (400 MHz, CDCl<sub>3</sub>) δ 8.42 (dd, *J* = 12.2, 5.8 Hz, 1H), 8.12 (dd, *J* = 23.2, 7.4 Hz, 2H), 7.74 – 7.65 (m, 2H), 7.36 (d, *J* = 7.8 Hz, 3H), 4.14 (dd, *J* = 15.4, 5.9 Hz, 1H), 3.82 (t, *J* = 14.3 Hz, 1H), 3.72 (s, 1H), 3.60 (s, 2H), 2.84 (dd, *J* = 15.4, 3.6 Hz, 1H), 2.67 (dd, *J* = 15.4, 4.4 Hz, 1H), 2.29 (s, 1H), 1.42 (d, *J* = 6.3 Hz, 2H), 1.26 (d, *J* = 7.1 Hz, 1H). <sup>13</sup>C NMR (101 MHz, CDCl<sub>3</sub>) 202.3, 182.8, 178.7, 178.5, 157.1, 156.3, 150.4, 143.2, 143.0, 136.0, 135.4, 134.3, 134.2, 134.1, 132.7, 132.7, 132.0, 131.9, 126.8, 126.5, 126.3, 126.3, 124.1, 124.1, 123.2, 123.1, 122.7, 122.7, 122.1, 121.9, 120.1, 110.6, 110.5, 110.3, 79.1, 47.0, 46.1, 32.5, 32.2, 26.7, 25.0, 21.7, 21.5. HRMS (ESI) Calcd for C<sub>26</sub>H<sub>20</sub>NNaO<sub>4</sub><sup>+</sup>[M+Na]<sup>+</sup>: 410.1392, Found: 410.1395.

**5-methyl-4'-phenyl-5*H*-spiro[benzo[5,6]indeno[2,1-*b*]indole-6,1'-cyclohexane]-2',6',7,12-tetraone (3ae)**

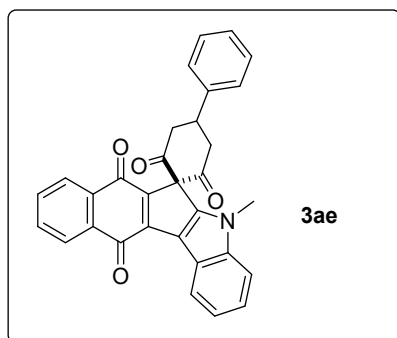

Blue solid, m.p. 320-321°C, yield: 38.2 mg, 81% yield; Rf: 0.62 (EA:PE =1:2). <sup>1</sup>H NMR (400 MHz, CDCl<sub>3</sub>) δ 8.47 – 8.29 (m, 1H), 8.17 (dt, *J* = 18.4, 9.0 Hz, 2H), 7.87 – 7.66 (m, 3H), 7.60 (d, *J* = 7.6 Hz, 1H), 7.48 (s, 2H), 7.40 (q, *J* = 6.8 Hz, 3H), 7.33 – 7.29 (m, 2H), 7.25 – 7.21 (m, 1H), 4.53 (dd, *J* = 15.4, 5.7 Hz, 1H), 4.40 (t, *J* = 14.5 Hz, 1H), 4.16 (t, *J* = 5.0 Hz, 1H), 3.70 (s, 1H), 3.50 (dd, *J* = 15.3, 4.1 Hz, 2H), 3.02 (dd, *J* = 15.4, 3.7 Hz, 1H), 2.85 (s, 2H). <sup>13</sup>C NMR (101 MHz, CDCl<sub>3</sub>) 202.2, 201.7, 182.8, 178.8, 178.7, 157.0, 156.6, 150.5, 150.4, 143.1, 141.4, 140.1, 134.3, 134.2, 132.7, 132.7, 131.9, 129.3, 129.2, 127.7, 127.5, 127.5, 127.0, 126.5, 126.3, 126.3, 124.2, 124.1, 123.2, 123.1, 122.8, 122.7, 122.1, 121.9, 120.3, 120.0, 110.7, 110.6, 78.4, 46.5, 44.1, 37.2, 33.1, 32.4, 31.3. HRMS (ESI) Calcd for C<sub>31</sub>H<sub>22</sub>NNaO<sub>4</sub><sup>+</sup>[M+Na]<sup>+</sup>: 472.1549, Found: 472.1546.

**4',4',5-trimethyl-5*H*-spiro[benzo[5,6]indeno[2,1-*b*]indole-6,1'-cyclohexane]-2',6',7,12-tetraone (3af)**

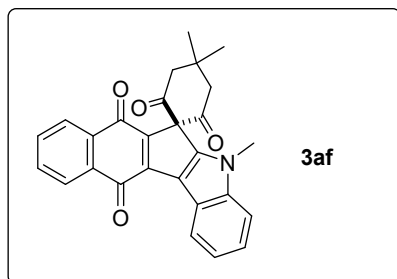

Blue solid, m.p. 251-252°C, yield: 30.9 mg, 73% yield; Rf: 0.63 (EA:PE =1:2). <sup>1</sup>H NMR (400 MHz, CDCl<sub>3</sub>) δ 8.47 (d, *J* = 9.2 Hz, 1H), 8.15 (dd, *J* = 7.6, 3.7 Hz, 2H), 7.81 – 7.64 (m, 2H), 7.45 – 7.31 (m, 3H), 4.24 (d, *J* = 14.6 Hz, 2H), 3.70 (s, 3H), 2.62 (d, *J*

= 14.6 Hz, 2H), 1.47 (s, 3H), 1.20 (s, 3H).  $^{13}\text{C}$  NMR (101 MHz,  $\text{CDCl}_3$ ) 202.2, 182.9, 178.5, 156.7, 150.1, 143.5, 134.6, 134.2, 132.6, 132.1, 131.7, 126.5, 126.1, 124.2, 123.3, 122.7, 122.0, 120.1, 110.6, 80.1, 51.8, 32.4, 31.3, 30.9, 28.3. HRMS (ESI) Calcd for  $\text{C}_{27}\text{H}_{21}\text{NNaO}_4^+[\text{M}+\text{Na}]^+$ : 446.1386, Found: 446.1363.

**5-methyl-5*H*-dispiro[benzo[5,6]indeno[2,1-*b*]indole-6,1'-cyclohexane-4',1''-cyclohexane]-2',6',7,12-tetraone (3ag)**

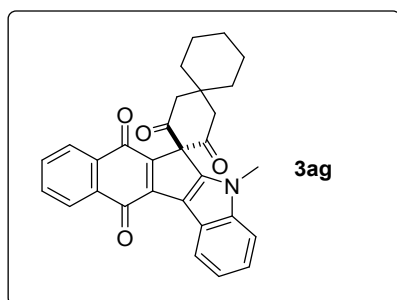

Blue solid, m.p. 350-351°C, yield: 39.9 mg, 86% yield; Rf: 0.65 (EA:PE =1:2).  $^1\text{H}$  NMR (400 MHz,  $\text{CDCl}_3$ )  $\delta$  8.46 (d,  $J = 6.6$  Hz, 1H), 8.15 (t,  $J = 7.6$  Hz, 2H), 7.78 – 7.67 (m, 2H), 7.43 – 7.34 (m, 3H), 4.30 (d,  $J = 14.4$  Hz, 2H), 3.67 (s, 3H), 2.70 (d,  $J = 14.4$  Hz, 2H), 1.95 (t,  $J = 7.1$  Hz, 2H), 1.83 (dq,  $J = 21.1, 6.7$  Hz, 4H), 1.60 (t,  $J = 7.2$  Hz, 2H), 1.54 (s, 2H).  $^{13}\text{C}$  NMR (101 MHz,  $\text{CDCl}_3$ ) 202.2, 183.0, 178.6, 157.0, 150.2, 143.4, 134.6, 134.2, 132.9, 132.6, 131.8, 126.5, 126.2, 124.2, 123.3, 122.7, 122.0, 120.1, 110.6, 79.8, 50.6, 41.2, 40.9, 36.8, 32.4, 26.3, 25.5, 24.1. HRMS (ESI) Calcd for  $\text{C}_{30}\text{H}_{26}\text{NNaO}_4^+[\text{M}+\text{Na}]^+$ : 464.1862, Found: 464.1851.

**5-methyl-5*H*-spiro[benzo[5,6]indeno[2,1-*b*]indole-6,1'-cycloheptane]-2',7,7',12-tetraone (3ah)**

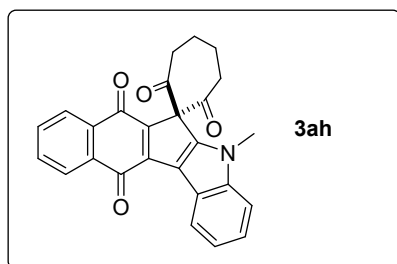

Blue solid, m.p.199-200°C, yield: 26.2 mg, 64% yield; Rf: 0.31 (EA:PE =1:2). <sup>1</sup>H NMR (400 MHz, CDCl<sub>3</sub>) δ 8.42 (dd, J = 6.4, 2.8 Hz, 1H), 8.15 (dd, J = 15.2, 8.2 Hz, 2H), 7.85 – 7.65 (m, 2H), 7.43 – 7.30 (m, 3H), 3.88 (s, 3H), 3.67 – 3.55 (m, 2H), 2.79 (t, J = 10.1 Hz, 2H), 2.59 – 2.48 (m, 2H), 2.14 (d, J = 11.2 Hz, 2H). <sup>13</sup>C NMR (101 MHz, CDCl<sub>3</sub>) 202.3, 182.8, 178.6, 155.2, 151.0, 143.1, 137.7, 134.4, 134.1, 132.6, 132.2, 126.4, 126.3, 124.0, 123.1, 122.6, 121.7, 118.9, 110.5, 80.0, 44.9, 33.0, 27.6. HRMS (ESI) Calcd for C<sub>26</sub>H<sub>19</sub>NNaO<sub>4</sub><sup>+</sup>[M+Na]<sup>+</sup>: 432.1212, Found: 432.1210.

**1',3',5-trimethyl-2'H,5H-spiro[benzo[5,6]indeno[2,1-*b*]indole-6,5'-pyrimidine]-2',4',6',7,12(1'H,3'H)-pentaone (3ai)**

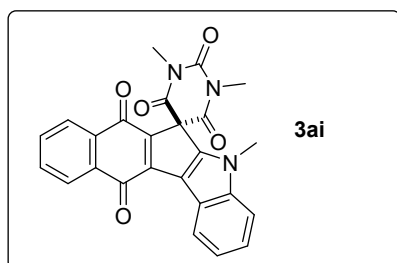

Blue solid, m.p. 345-346°C, yield: 29.4 mg, 67% yield; Rf: 0.46 (EA:PE =1:2). <sup>1</sup>H NMR (400 MHz, CDCl<sub>3</sub>) δ 8.40 (s, 1H), 8.18 (d, J = 6.7 Hz, 1H), 8.05 (d, J = 6.8 Hz, 1H), 7.72 (s, 2H), 7.39 (s, 3H), 3.73 (s, 3H), 3.47 (s, 6H). <sup>13</sup>C NMR (101 MHz, CDCl<sub>3</sub>) 182.3, 178.7, 163.4, 152.3, 151.2, 150.7, 142.6, 139.7, 134.2, 133.4, 133.1, 132.3, 126.7, 126.2, 124.4, 123.1, 123.0, 122.1, 120.6, 110.7, 32.0, 29.7. HRMS (ESI) Calcd for C<sub>25</sub>H<sub>17</sub>N<sub>3</sub>NaO<sub>5</sub><sup>+</sup>[M+Na]<sup>+</sup>: 462.1066, Found: 462.1061.

**5-methyl-1',2'-diphenyl-5H-spiro[benzo[5,6]indeno[2,1-*b*]indole-6,4'-pyrazolidine]-3',5',7,12-tetraone (3aj)**

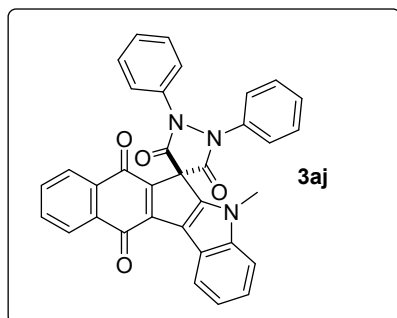

Purple solid, m.p. 287-288°C, yield: 33.2 mg, 62% yield; Rf: 0.43 (EA:PE =1:2). <sup>1</sup>H NMR (400 MHz, CDCl<sub>3</sub>) δ 8.41 – 8.33 (m, 1H), 8.26 – 8.17 (m, 1H), 8.09 (dt, J = 6.4, 2.1 Hz, 1H), 7.76 – 7.70 (m, 2H), 7.65 – 7.54 (m, 4H), 7.41 (t, J = 7.8 Hz, 4H), 7.37 (d, J = 3.2 Hz, 3H), 7.30 – 7.26 (m, 2H), 3.84 (s, 3H). <sup>13</sup>C NMR (101 MHz, CDCl<sub>3</sub>) 182.0, 178.6, 164.3, 150.8, 149.2, 142.4, 140.6, 135.3, 133.9, 133.1, 132.9, 132.5, 129.2, 127.7, 126.6, 126.1, 124.1, 123.6, 122.7, 122.6, 122.0, 120.9, 110.4, 31.7. HRMS (ESI) Calcd for C<sub>34</sub>H<sub>22</sub>N<sub>3</sub>NaO<sub>4</sub><sup>+</sup>[M+Na]<sup>+</sup>: 536.1610, Found: 536.1610.

**2-(6-chloro-1-methyl-1H-indol-3-yl)-3-(2-hydroxy-6-oxocyclohex-1-en-1-yl)naphthalene-1,4-dione (3ka)**

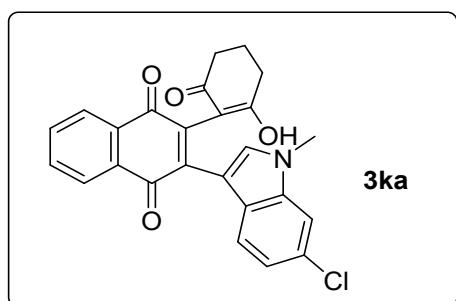

Red solid, m.p. 197-198°C, yield: 36.7 mg, 85% yield; Rf: 0.2 (EA:PE =1:1). <sup>1</sup>H NMR (400 MHz, DMSO-d<sub>6</sub>) δ 10.57 (s, 1H), 8.09 – 8.03 (m, 1H), 8.03 – 7.94 (m, 1H), 7.87 (q, J = 4.5, 3.4 Hz, 2H), 7.56 (d, J = 1.9 Hz, 1H), 7.33 (s, 1H), 7.18 (d, J = 8.6 Hz, 1H), 6.99 (dd, J = 8.6, 1.8 Hz, 1H), 3.81 (s, 3H), 2.29 (s, 2H), 2.07 (s, 2H), 1.78 (dt, J = 11.5, 5.9 Hz, 1H), 1.50 (ddt, J = 13.3, 8.7, 4.5 Hz, 1H). <sup>13</sup>C NMR (101 MHz, DMSO) 184.5, 183.1, 142.1, 140.4, 137.2, 134.5, 134.1, 133.1, 132.7, 132.4, 126.6, 126.5, 126.2, 125.9, 122.3, 119.9, 112.3, 110.4, 108.3, 33.3, 20.6. HRMS (ESI) Calcd for C<sub>25</sub>H<sub>19</sub>NO<sub>4</sub>Cl<sup>+</sup>[M+H]<sup>+</sup>: 432.1003, Found: 432.0995.

## 5. References

- [1] Y. Dong, H. Zhang, J. Yang, S. He, Z.-C. Shi, X.-M. Zhang and J.-Y. Wang, B(C<sub>6</sub>F<sub>5</sub>)<sub>3</sub>-Catalyzed C–C Coupling of 1,4-Naphthoquinones with the C-3 Position of Indole Derivatives in Water, *ACS Omega*, 2019, **4**, 21567–21577.

## 6. NMR Spectra of New Compounds

### 5-methyl-5*H*-spiro[benzo[5,6]indeno[2,1-*b*]indole-6,1'-cyclohexane]-2',6',7,12-tetraone (3aa)

$^1\text{H}$  NMR (400 MHz)

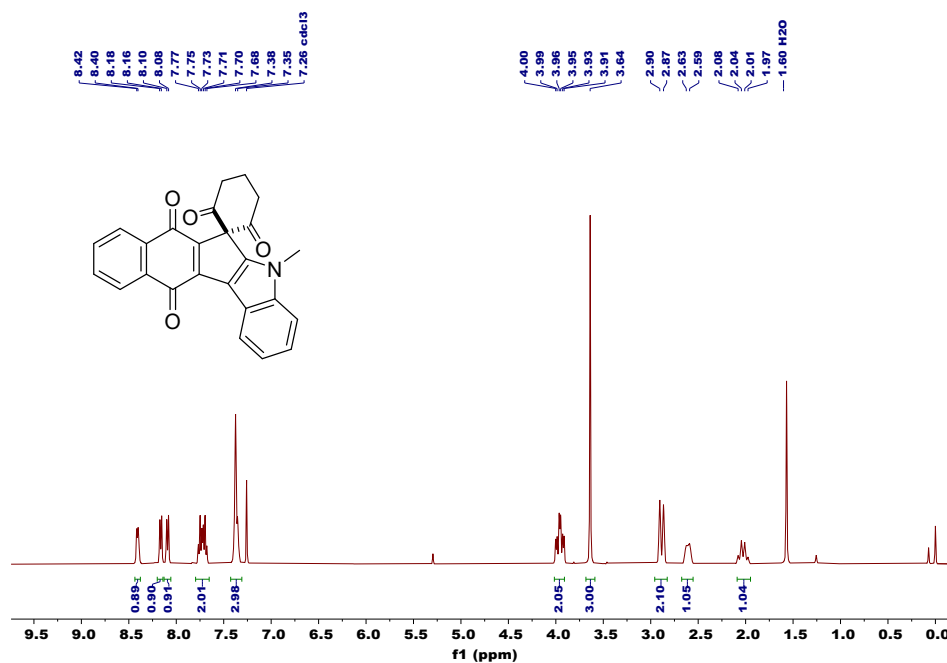

$^{13}\text{C}$  NMR (101 MHz)

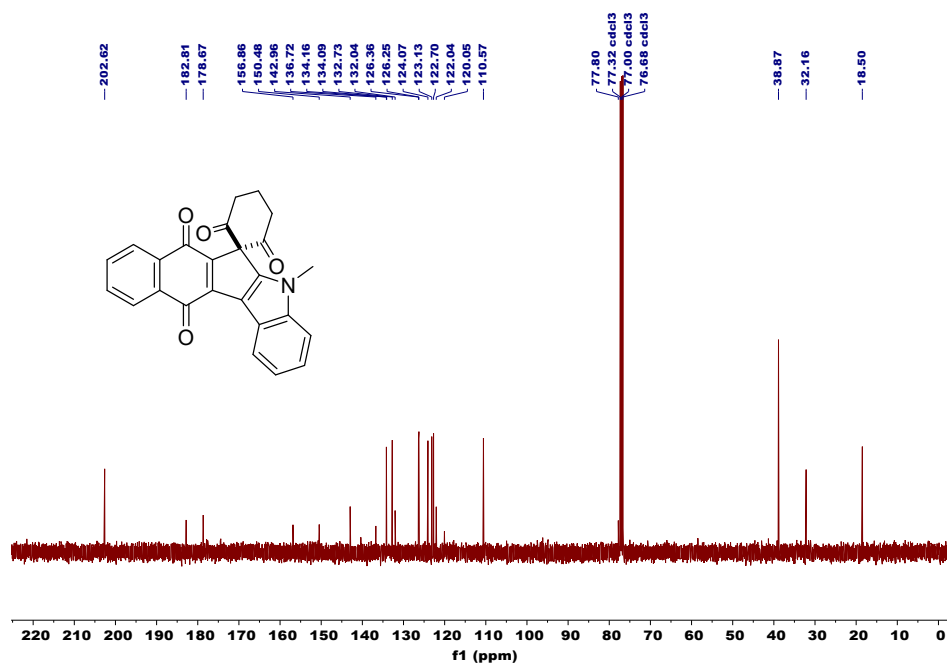



**1,5-dimethyl-5*H*-spiro[benzo[5,6]indeno[2,1-*b*]indole-6,1'-cyclohexane]-2',6',7,12-tetraone (3ba)**

**<sup>1</sup>H NMR (400 MHz)**

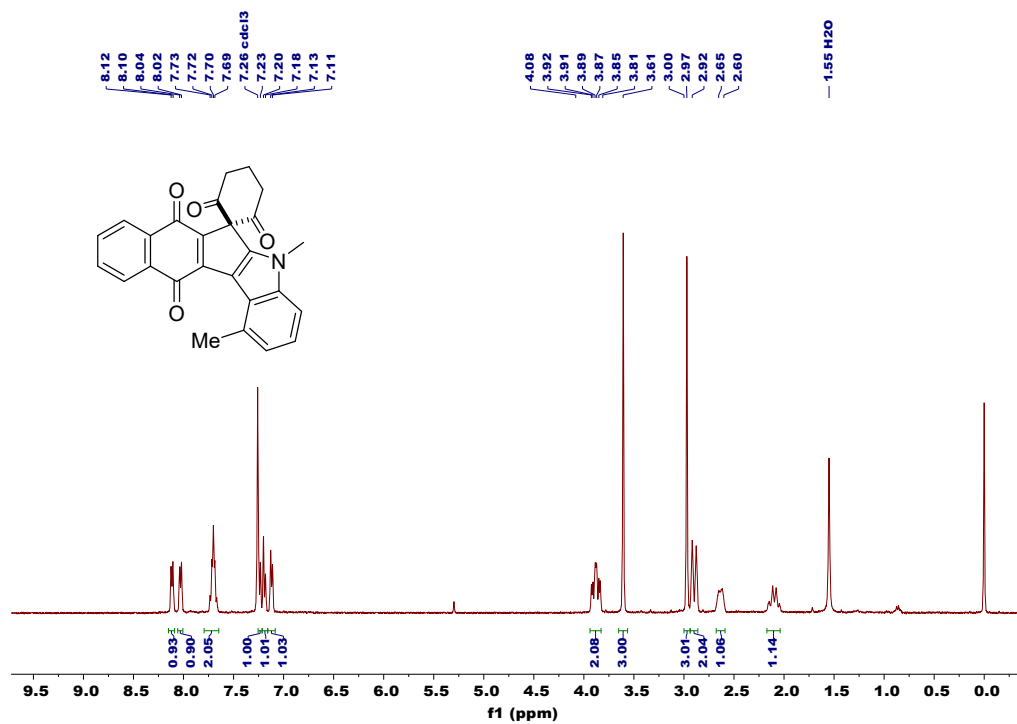

**<sup>13</sup>C NMR (101 MHz)**

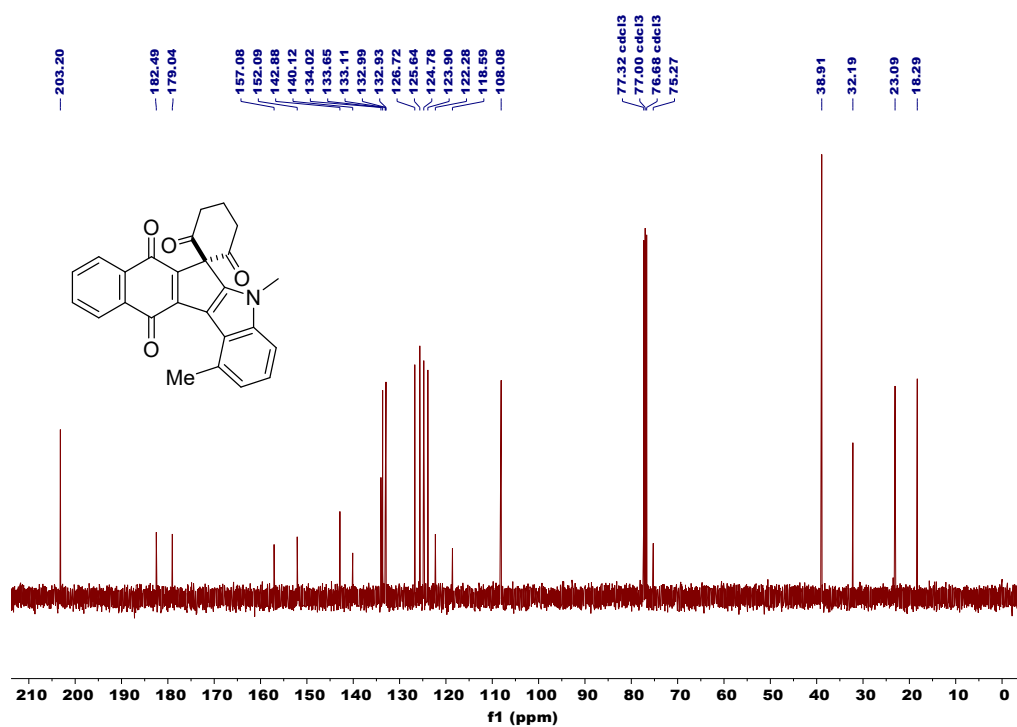

**2-methoxy-5-methyl-5H-spiro[benzo[5,6]indeno[2,1-b]indole-6,1'-cyclohexane]-2',6',7,12-tetraone (3ea)**

**<sup>1</sup>H NMR (400 MHz)**

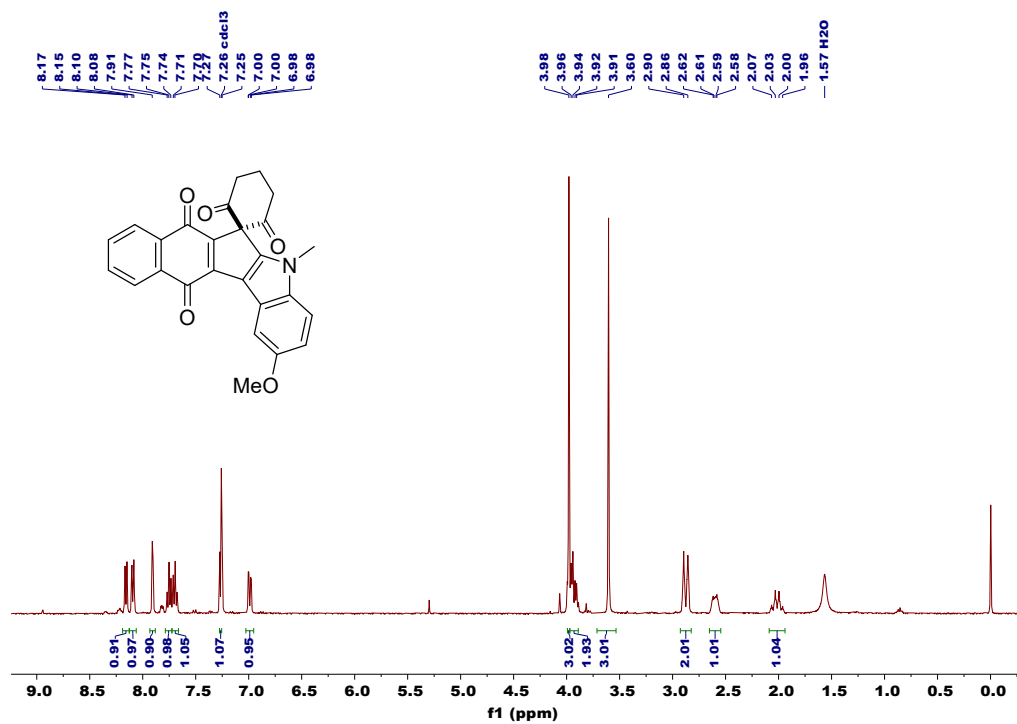

**<sup>13</sup>C NMR (101 MHz)**

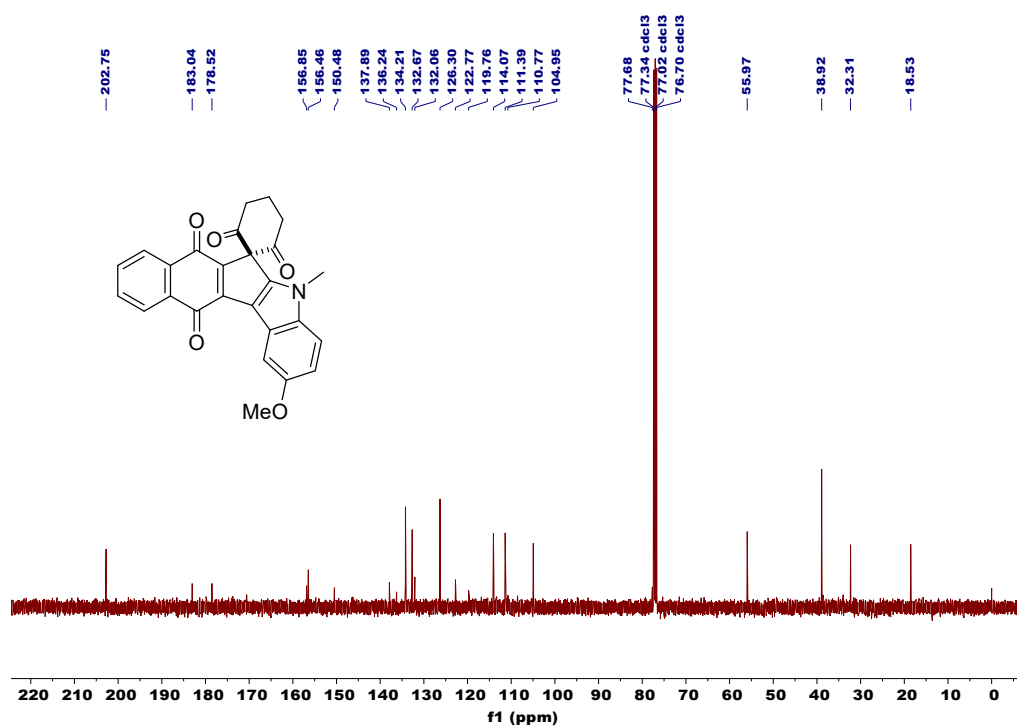

**2,5-dimethyl-5*H*-spiro[benzo[5,6]indeno[2,1-*b*]indole-6,1'-cyclohexane]-2',6',7,12-tetraone (3fa)**

**<sup>1</sup>H NMR (400 MHz)**

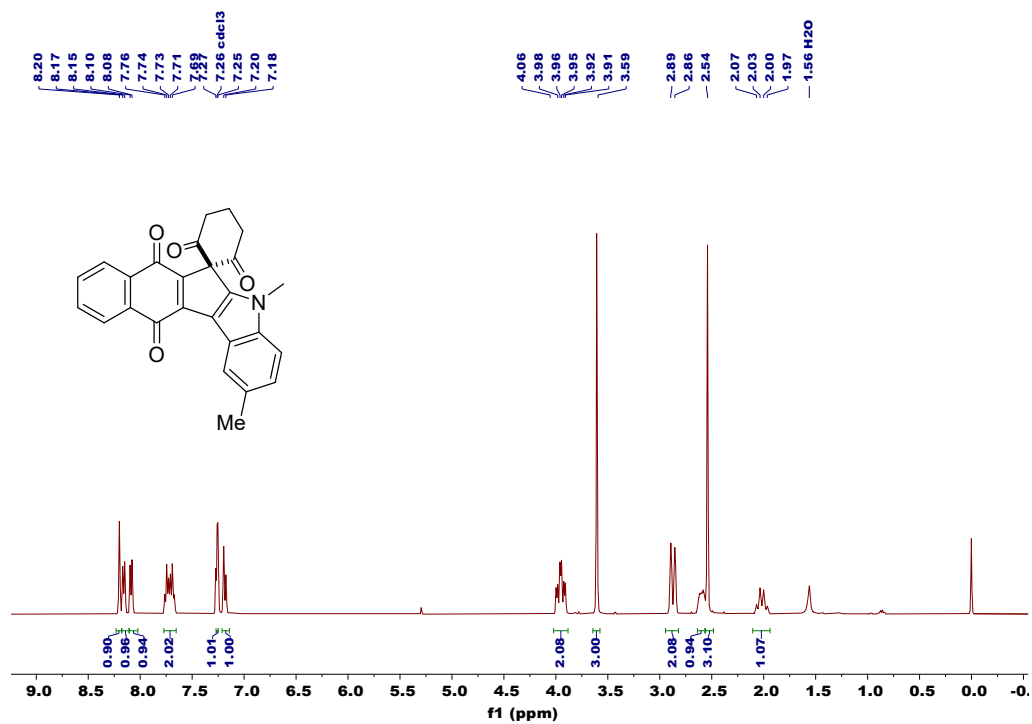

**<sup>13</sup>C NMR (101 MHz)**

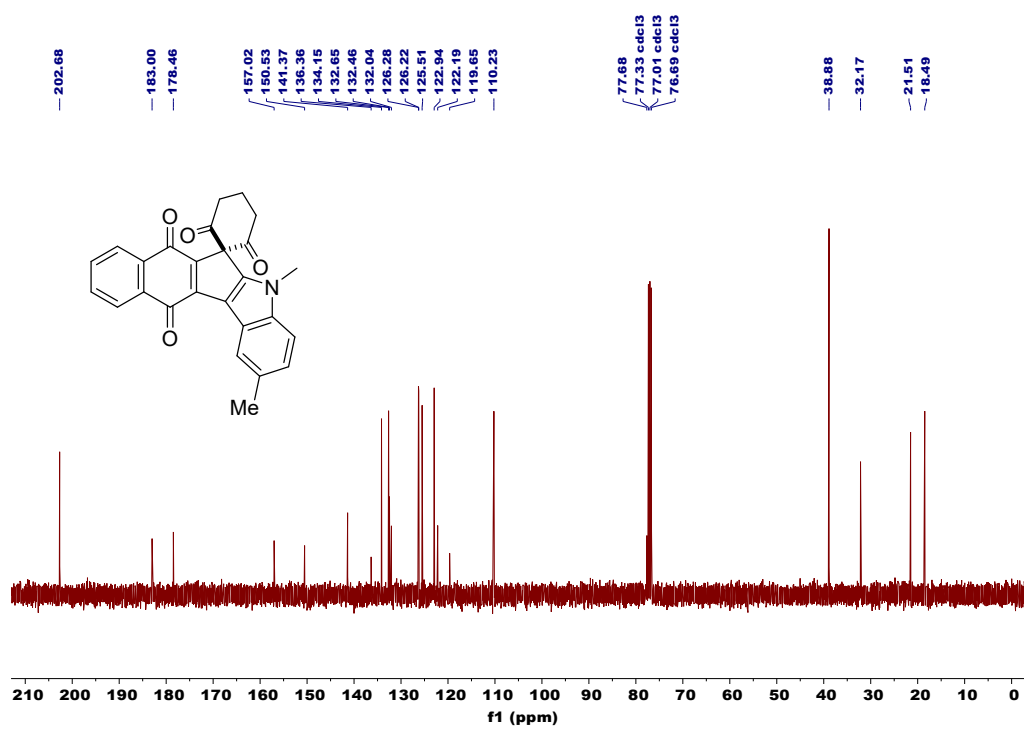

**2-chloro-5-methyl-5H-spiro[benzo[5,6]indeno[2,1-b]indole-6,1'-cyclohexane]-2',6',7,12-tetraone (3ga)**

**<sup>1</sup>H NMR (400 MHz)**

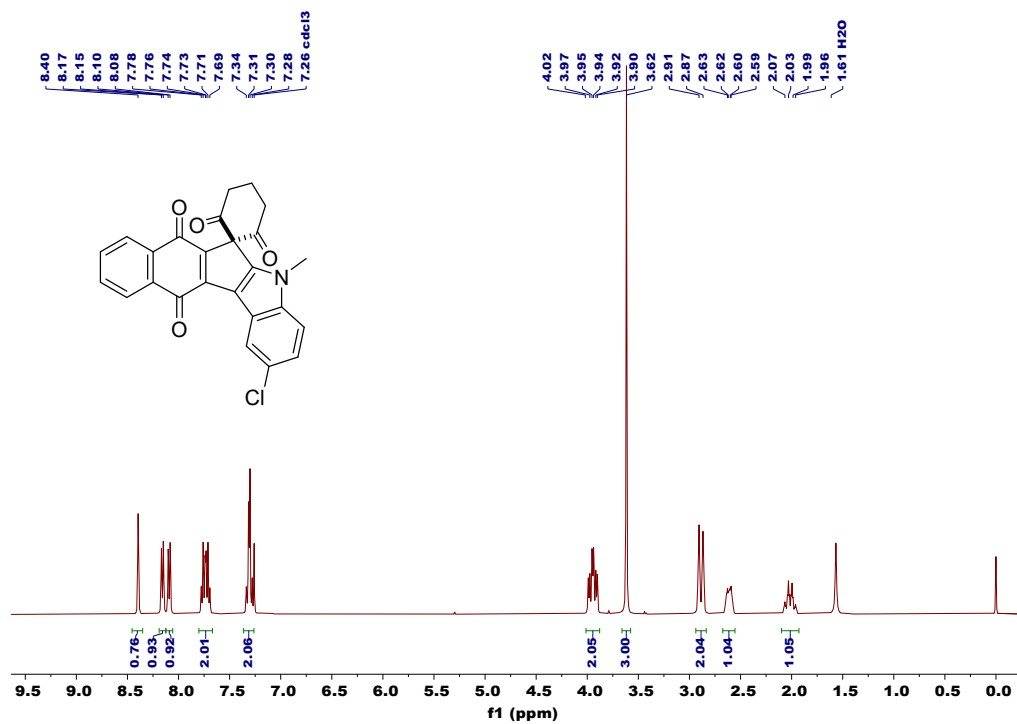

**<sup>13</sup>C NMR (101 MHz)**

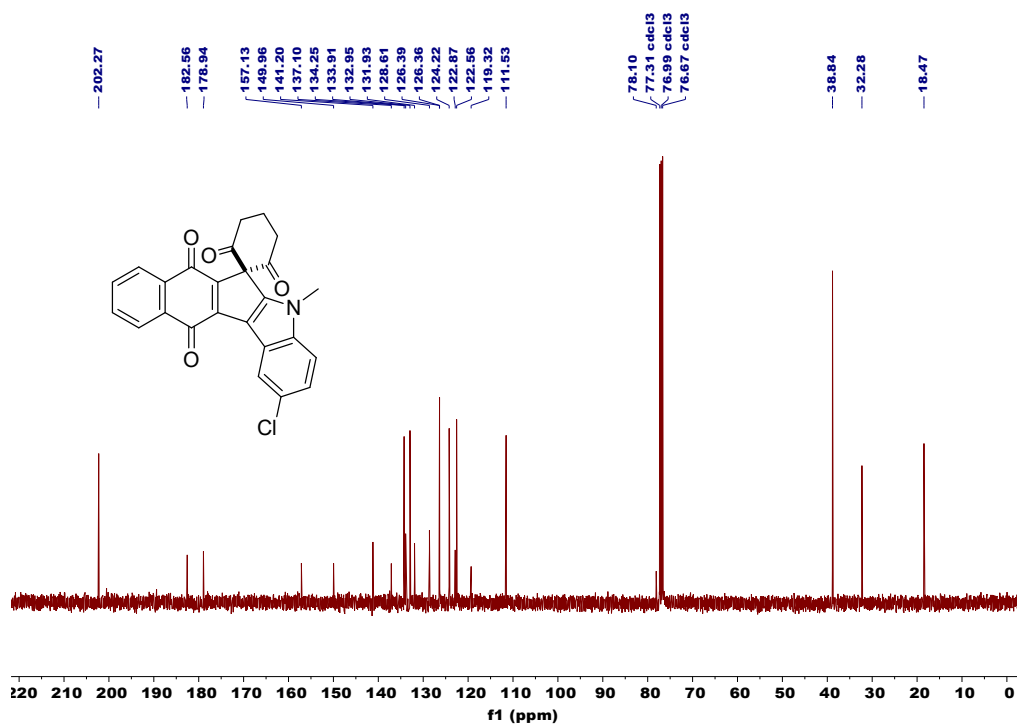

**2-bromo-5-methyl-5*H*-spiro[benzo[5,6]indeno[2,1-*b*]indole-6,1'-cyclohexane]-2',6',7,12-tetraone (3ha)**

**<sup>1</sup>H NMR (400 MHz)**

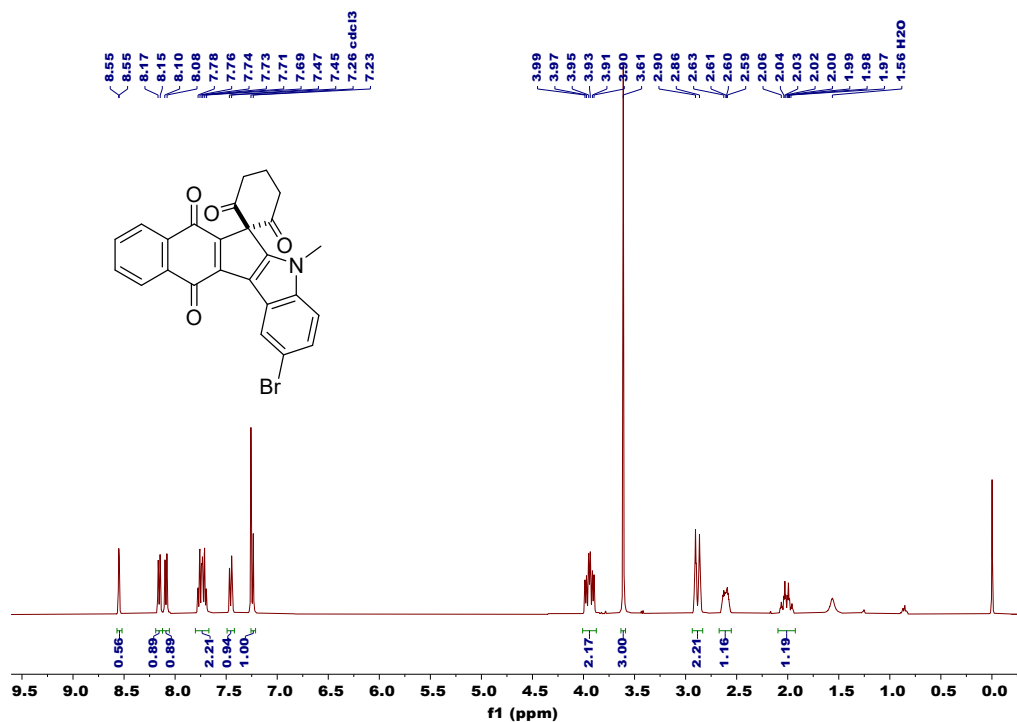

**<sup>13</sup>C NMR (101 MHz)**

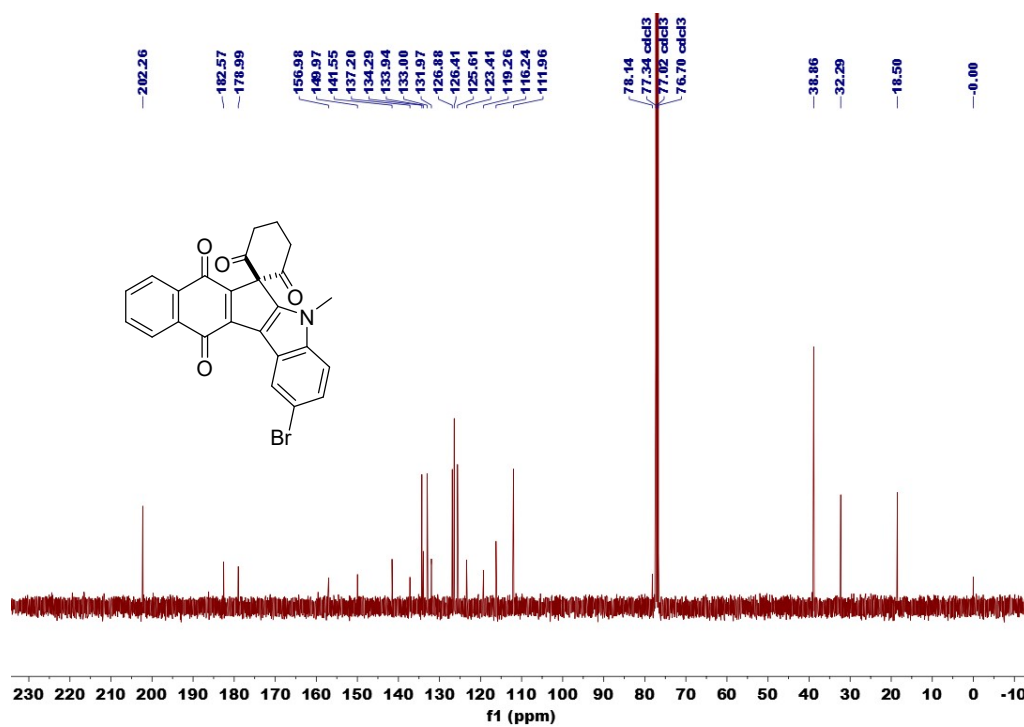

**3-methoxy-5-methyl-5*H*-spiro[benzo[5,6]indeno[2,1-*b*]indole-6,1'-cyclohexane]-2',6',7,12-tetraone (3ia)**

**<sup>1</sup>H NMR (400 MHz)**

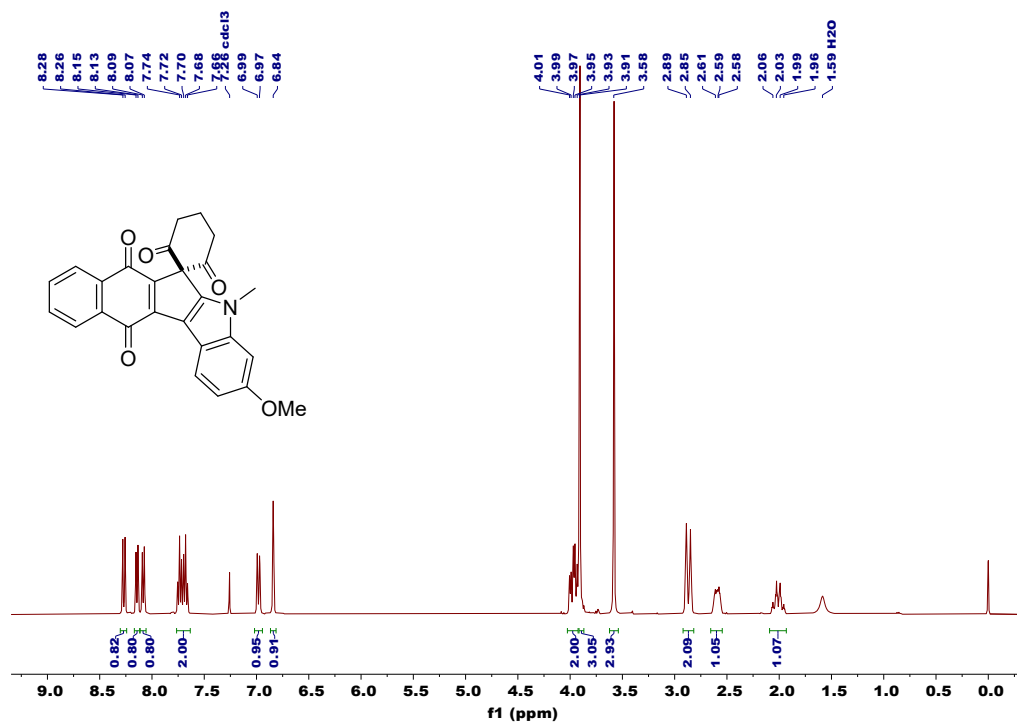

**<sup>13</sup>C NMR (101 MHz)**

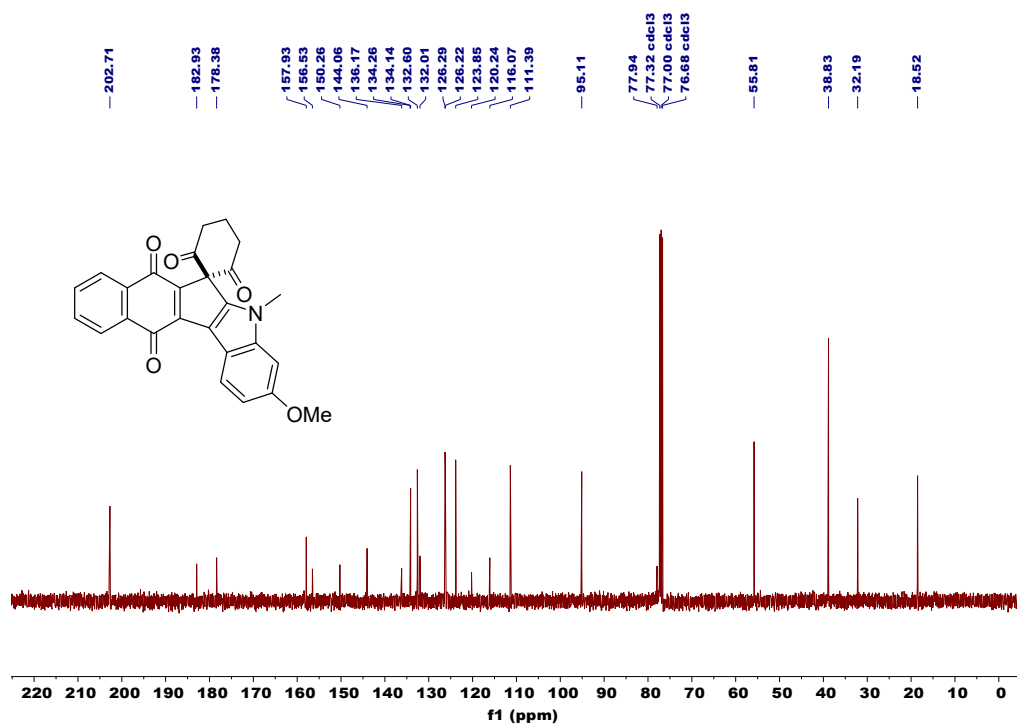

**3-fluoro-5-methyl-5*H*-spiro[benzo[5,6]indeno[2,1-*b*]indole-6,1'-cyclohexane]-2',6',7,12-tetraone (3ja)**

**<sup>1</sup>H NMR (400 MHz)**

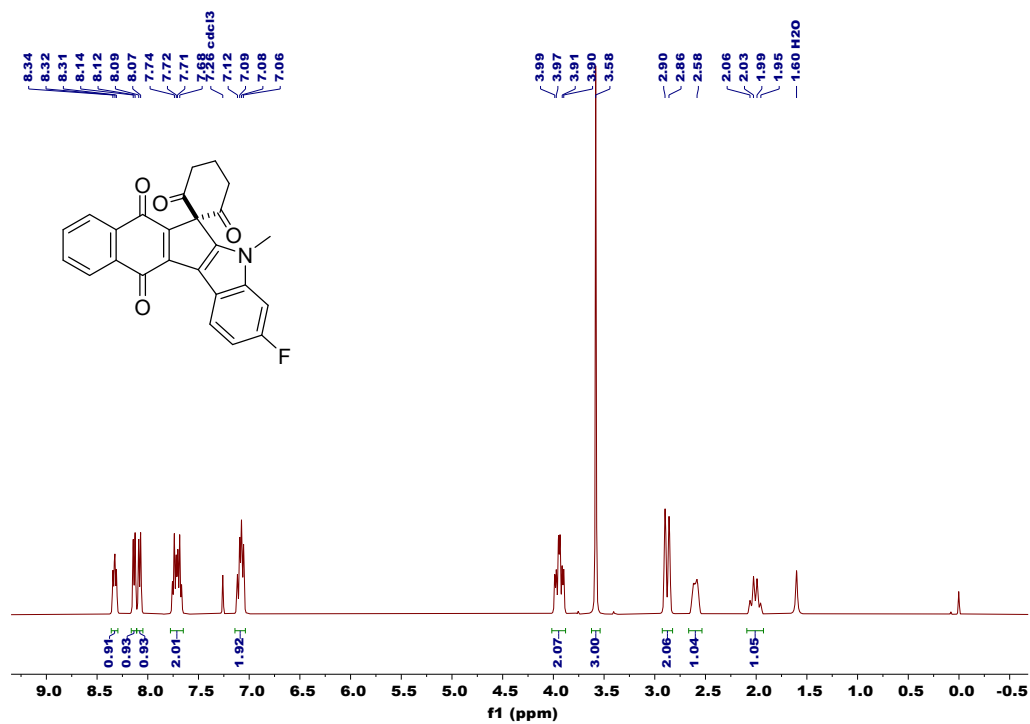

**<sup>13</sup>C NMR (101 MHz)**

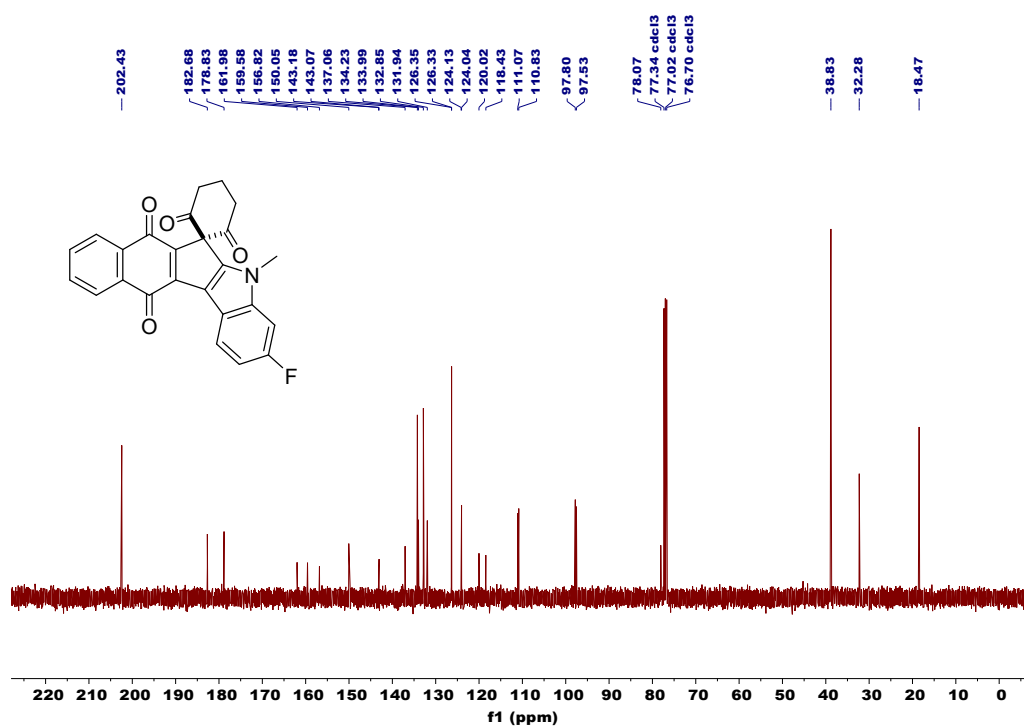

**<sup>19</sup>F NMR (376 MHz)**

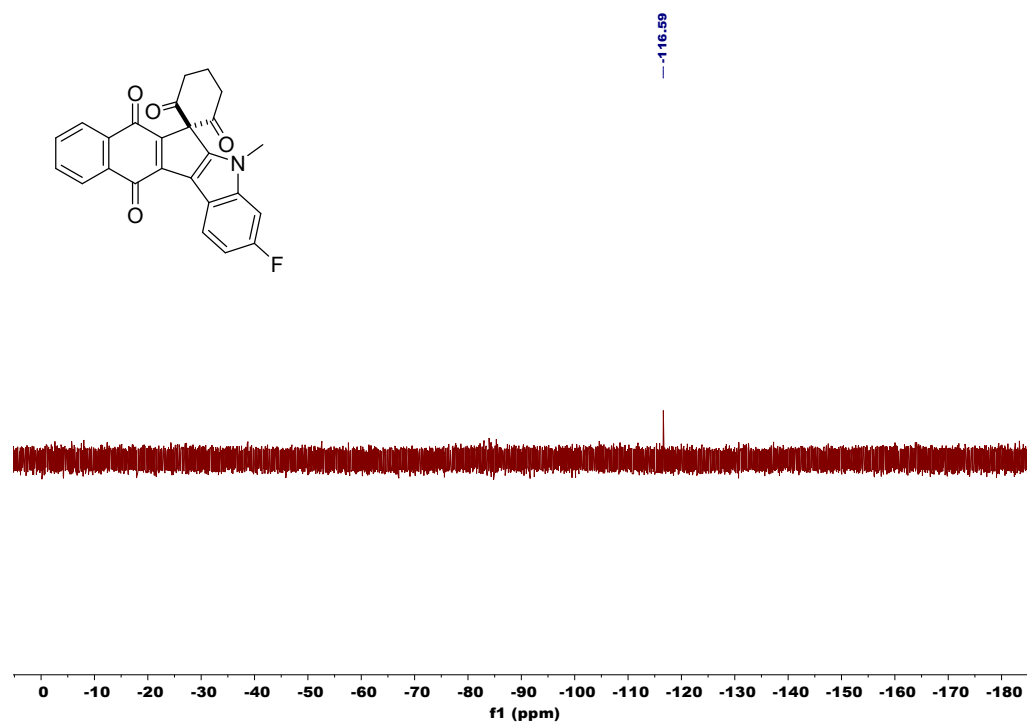



**3-chloro-5-methyl-5H-spiro[benzo[5,6]indeno[2,1-b]indole-6,1'-cyclohexane]-2',6',7,12-tetraone (3ka)**

**<sup>1</sup>H NMR (400 MHz)**

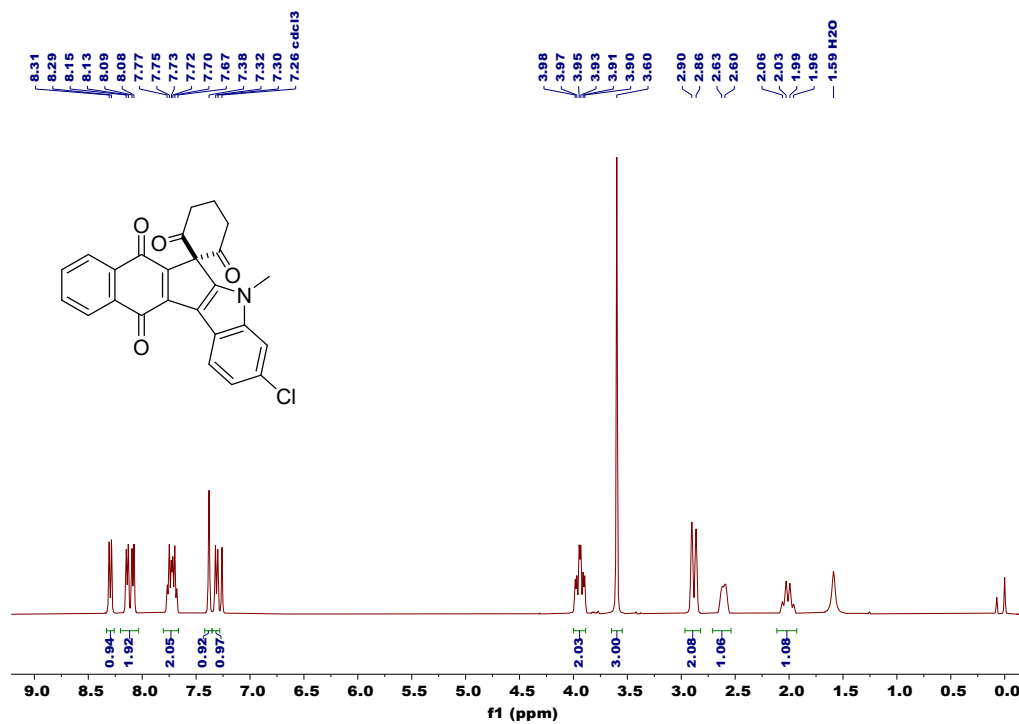

**<sup>13</sup>C NMR (101 MHz)**

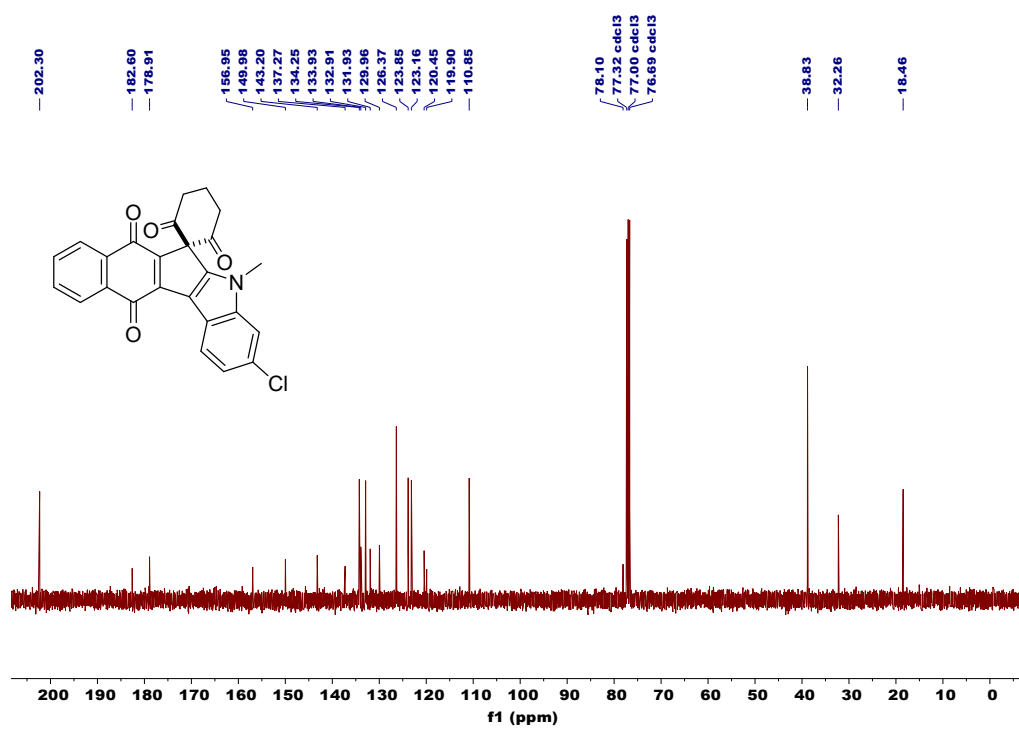

**3-bromo-5-methyl-5H-spiro[benzo[5,6]indeno[2,1-b]indole-6,1'-cyclohexane]-2',6',7,12-tetraone (3la)**

**<sup>1</sup>H NMR (400 MHz)**

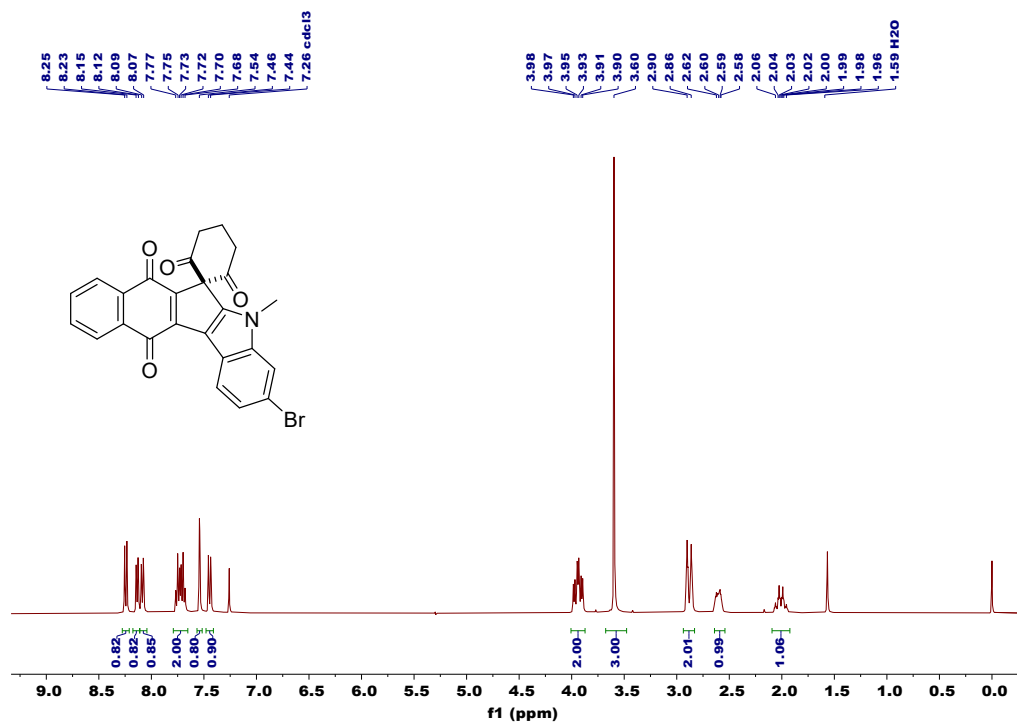

**<sup>13</sup>C NMR (101 MHz)**

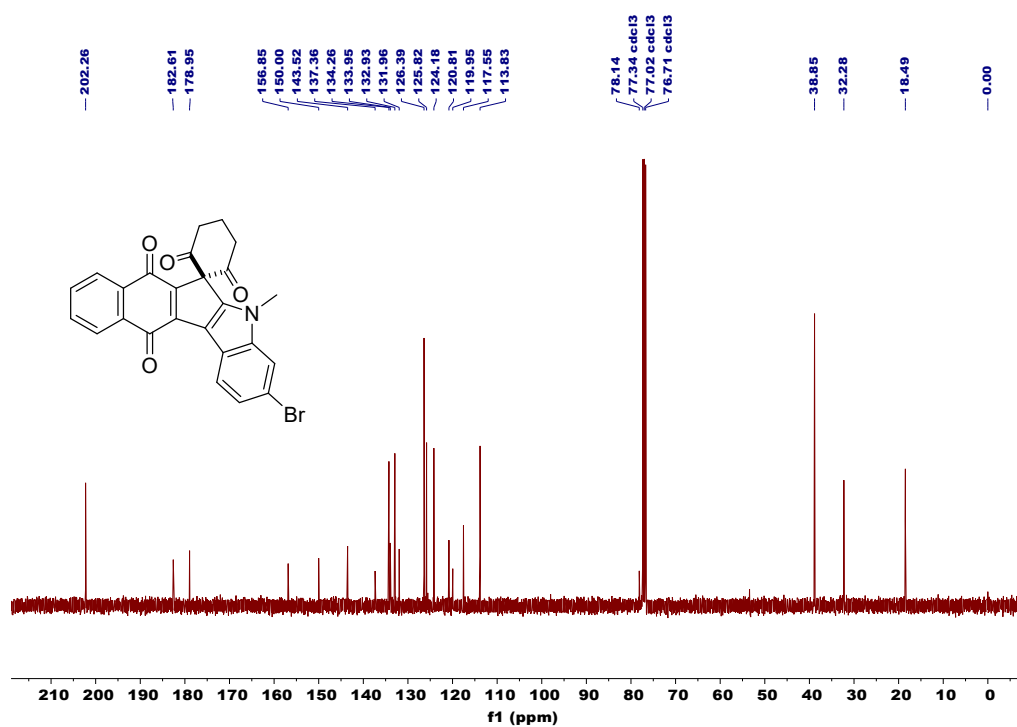

**4,5-dimethyl-5*H*-spiro[benzo[5,6]indeno[2,1-*b*]indole-6,1'-cyclohexane]-2',6',7,12-tetraone (3ma)**

**<sup>1</sup>H NMR (400 MHz)**

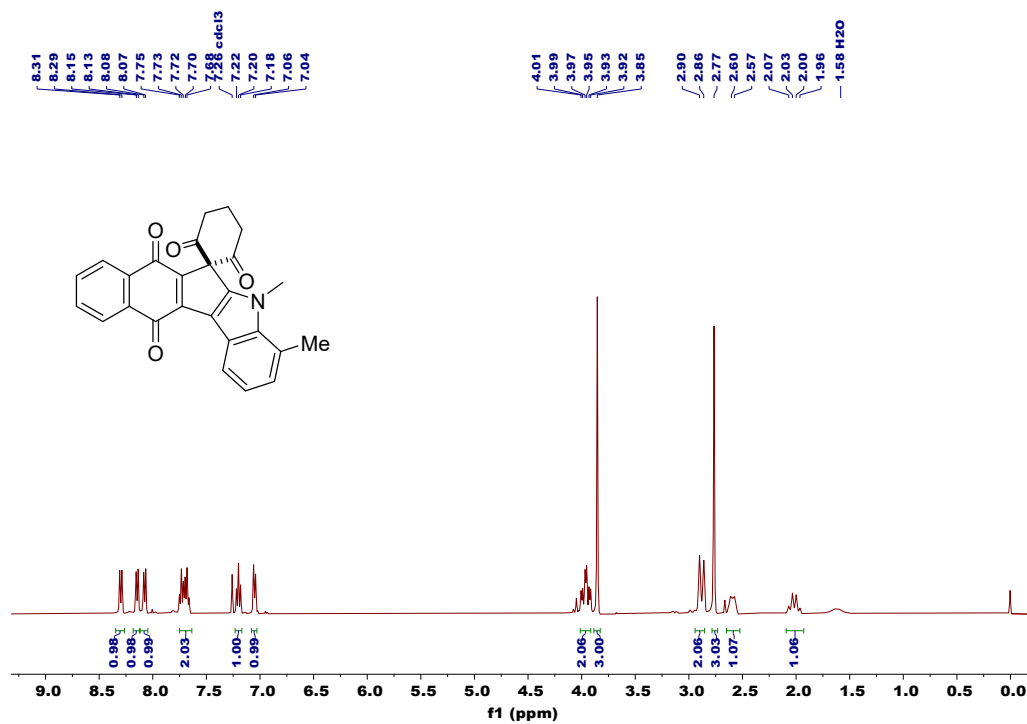

**<sup>13</sup>C NMR (101 MHz)**

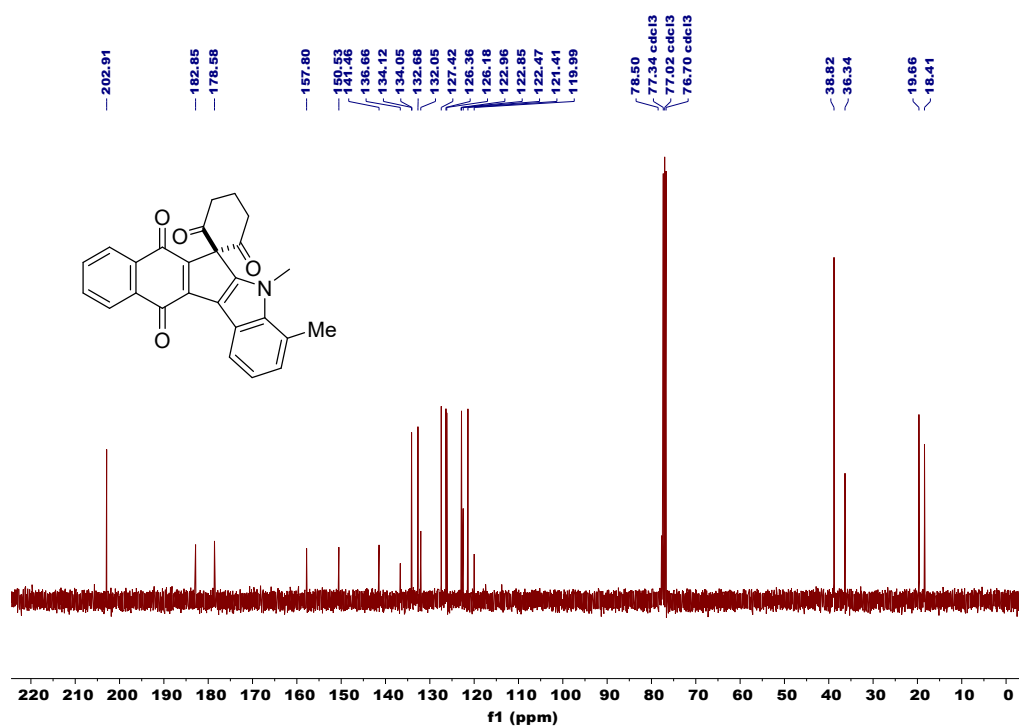

**5-allyl-5H-spiro[benzo[5,6]indeno[2,1-b]indole-6,1'-cyclohexane]-  
2',6',7,12-tetraone (3pa)**

**<sup>1</sup>H NMR (400 MHz)**

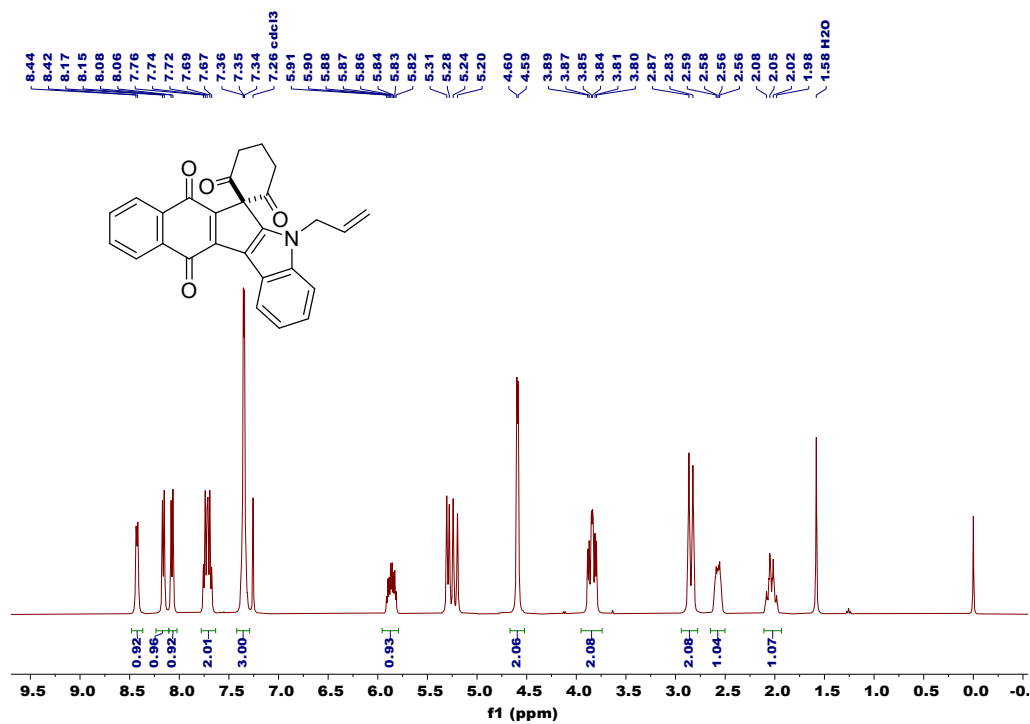

**<sup>13</sup>C NMR (101 MHz)**

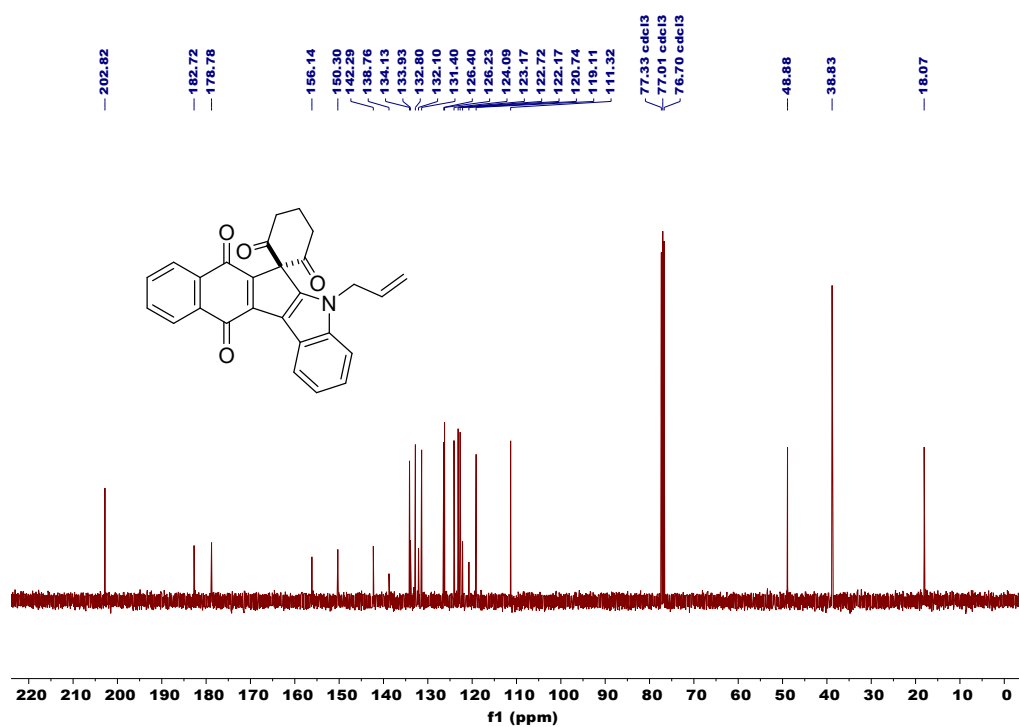

**5-(prop-2-yn-1-yl)-5*H*-spiro[benzo[5,6]indeno[2,1-*b*]indole-6,1'-cyclohexane]-2',6',7,12-tetraone (3qa)**

**<sup>1</sup>H NMR (400 MHz)**

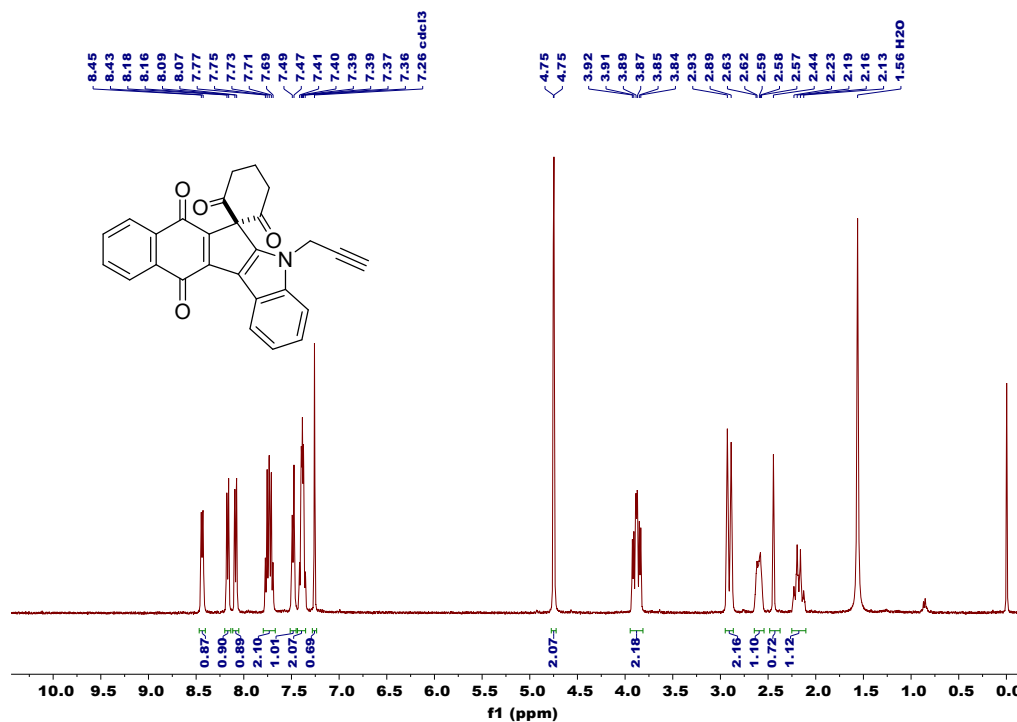

**<sup>13</sup>C NMR (101 MHz)**

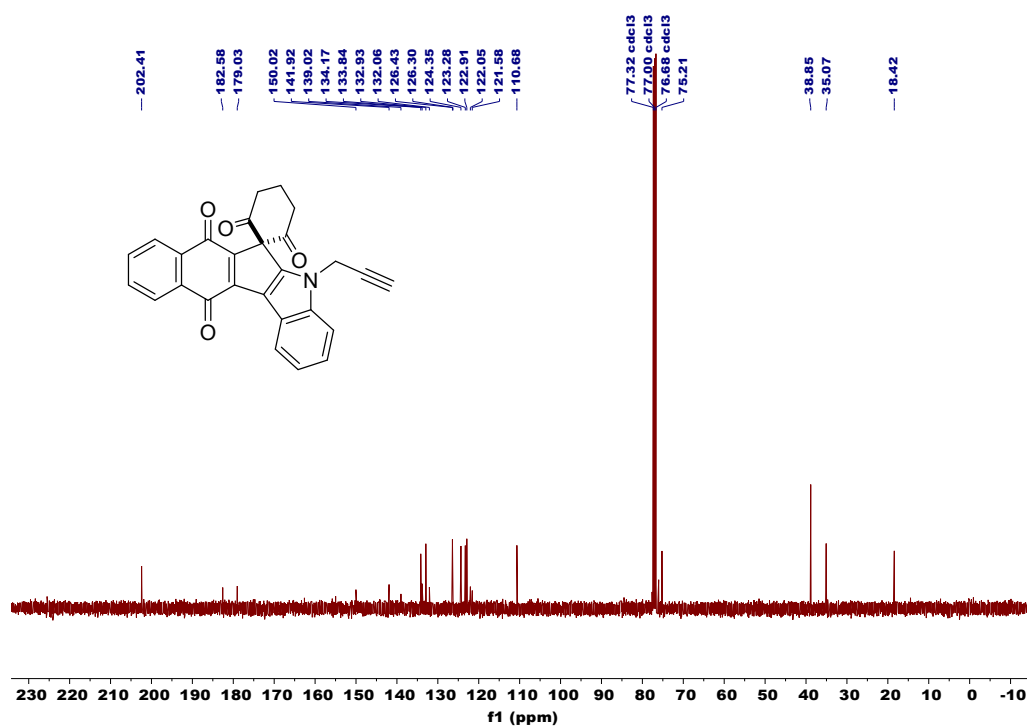

**5-benzyl-5*H*-spiro[benzo[5,6]indeno[2,1-*b*]indole-6,1'-cyclohexane]-  
2',6',7,12-tetraone (3ra)**

**<sup>1</sup>H NMR (400 MHz)**

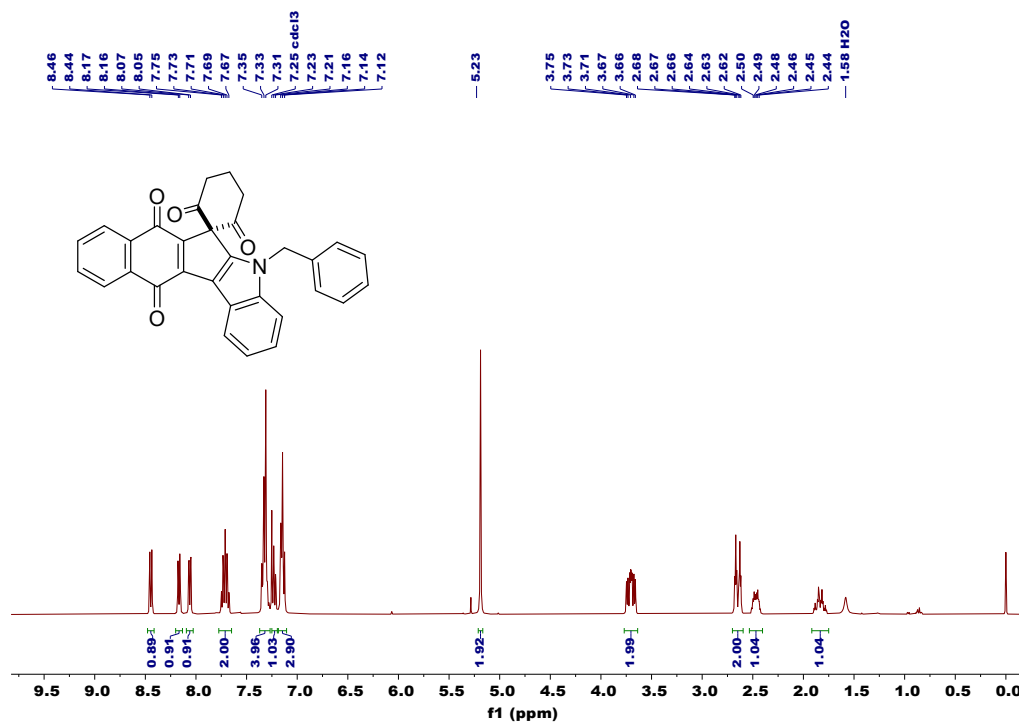

**<sup>13</sup>C NMR (101 MHz)**

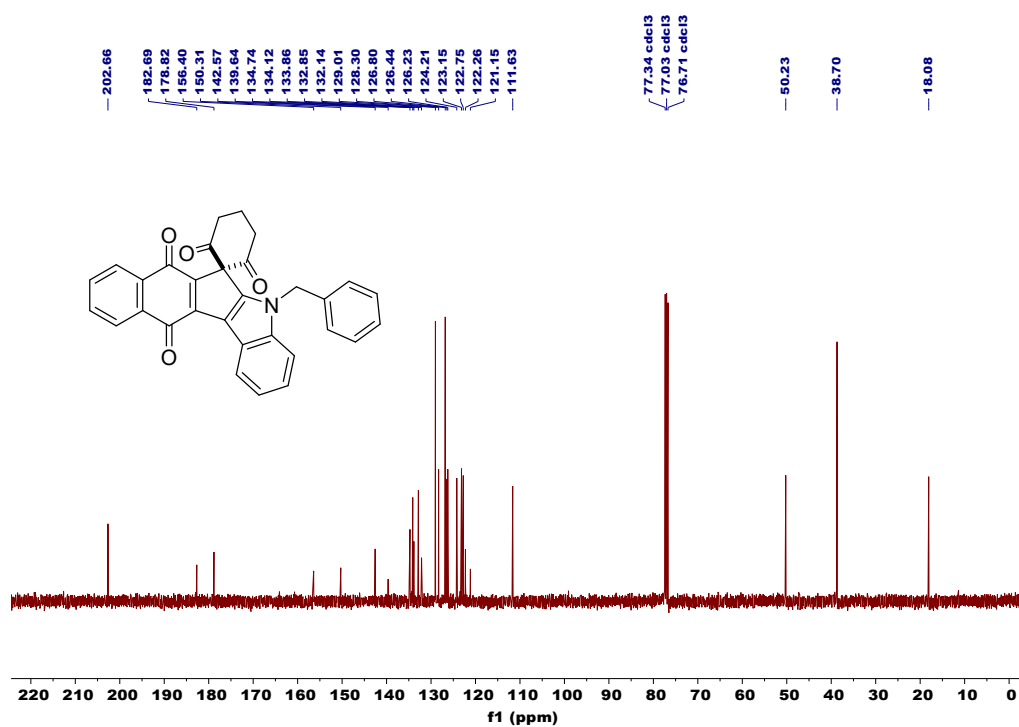

**5-acetyl-5*H*-spiro[benzo[5,6]indeno[2,1-*b*]indole-6,1'-cyclohexane]-  
2',6',7,12-tetraone (3sa)**

**<sup>1</sup>H NMR (400 MHz)**

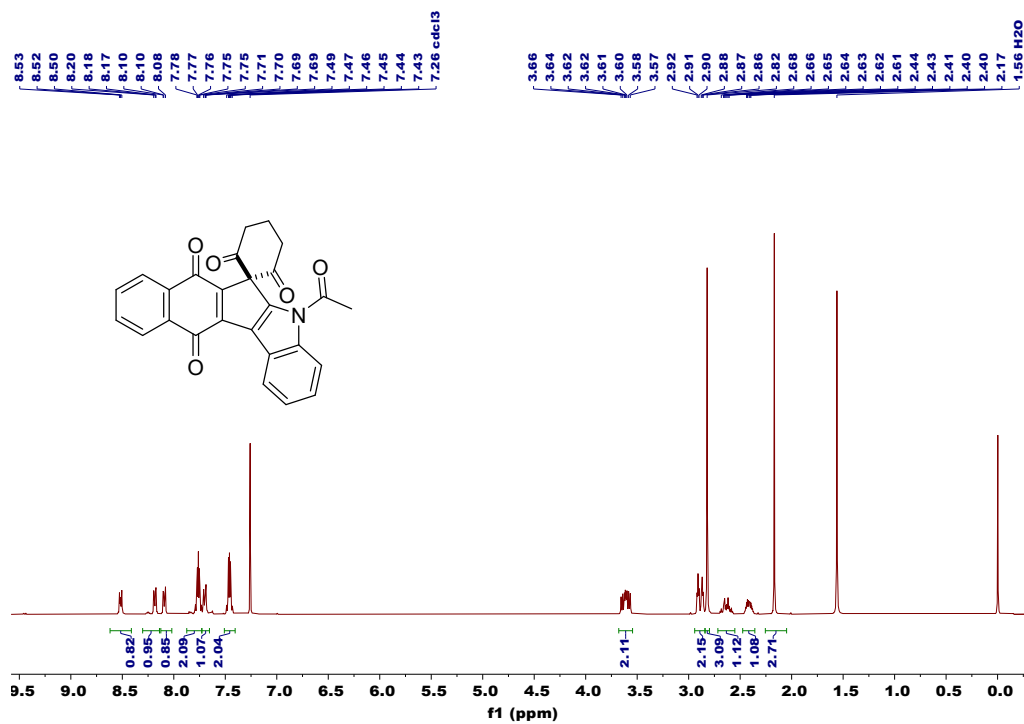

**<sup>13</sup>C NMR (101 MHz)**

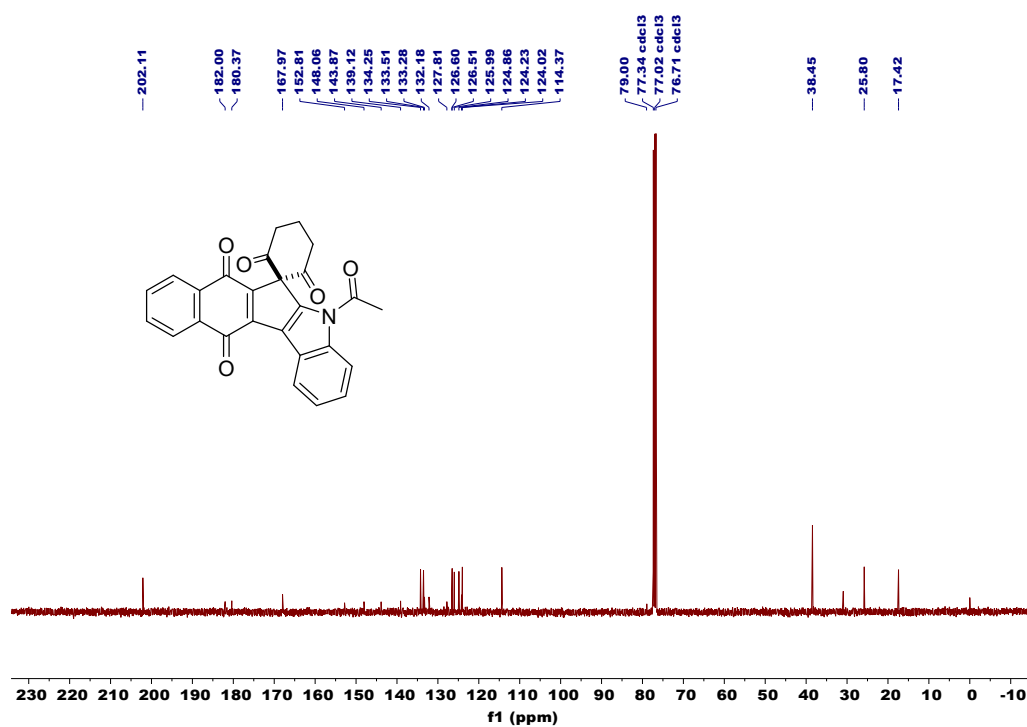

**5,9,10-trimethyl-5*H*-spiro[benzo[5,6]indeno[2,1-*b*]indole-6,1'-cyclohexane]-2',6',7,12-tetraone (3ta)**

**<sup>1</sup>H NMR (400 MHz)**

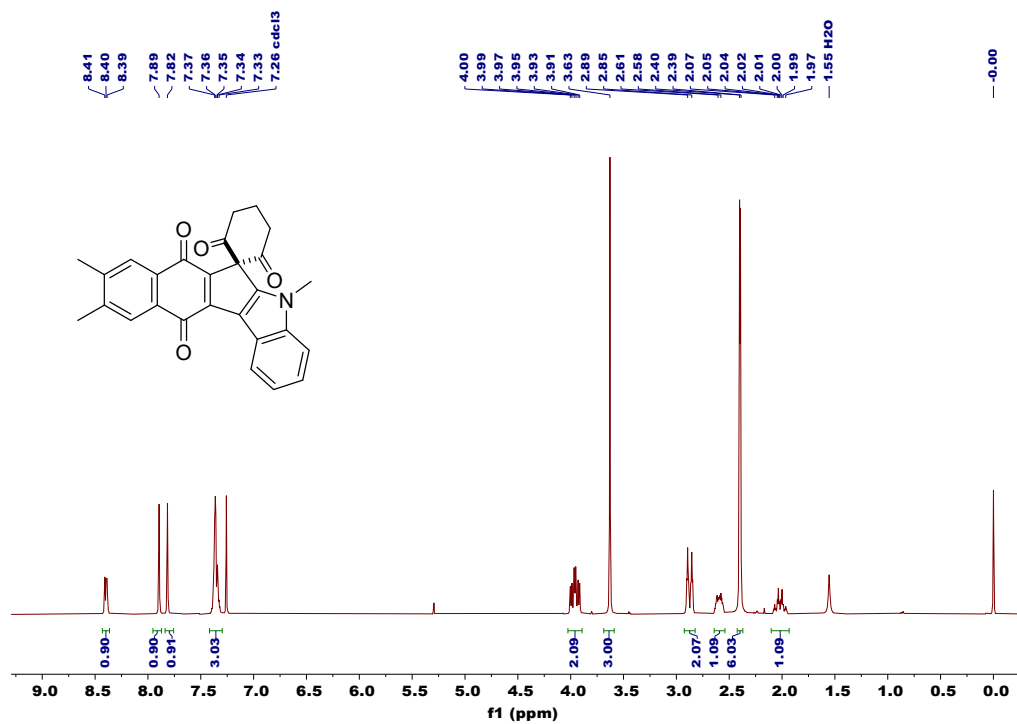

**<sup>13</sup>C NMR (101 MHz)**

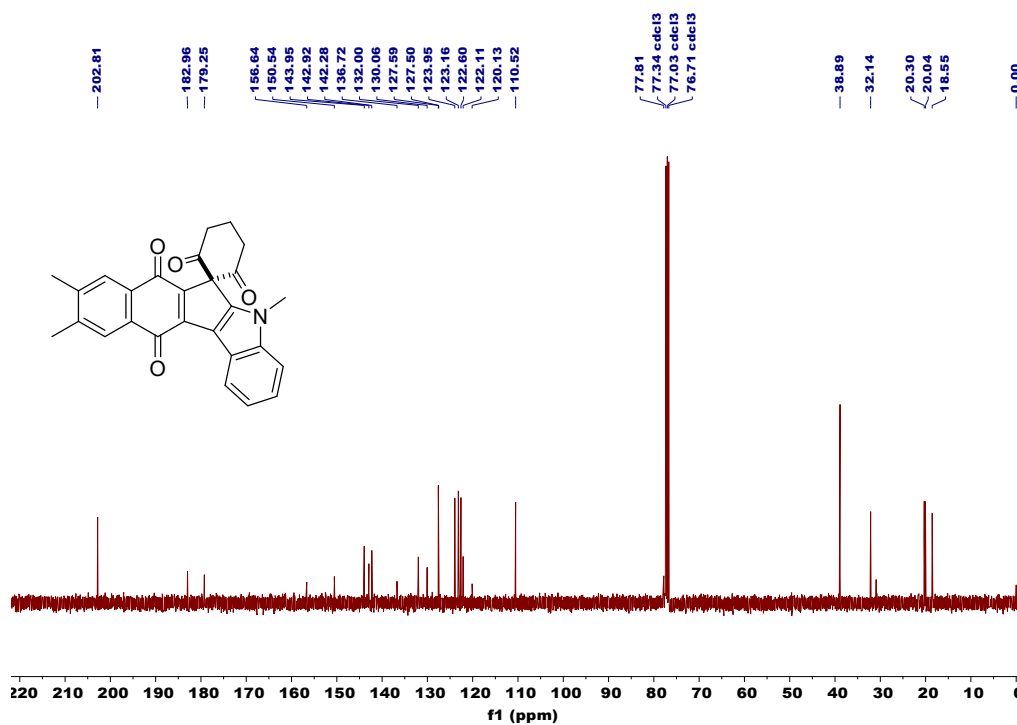



**9,10-dibromo-5-methyl-5H-spiro[benzo[5,6]indeno[2,1-b]indole-6,1'-cyclohexane]-2',6',7,12-tetraone (3ua)**

**<sup>1</sup>H NMR (400 MHz)**

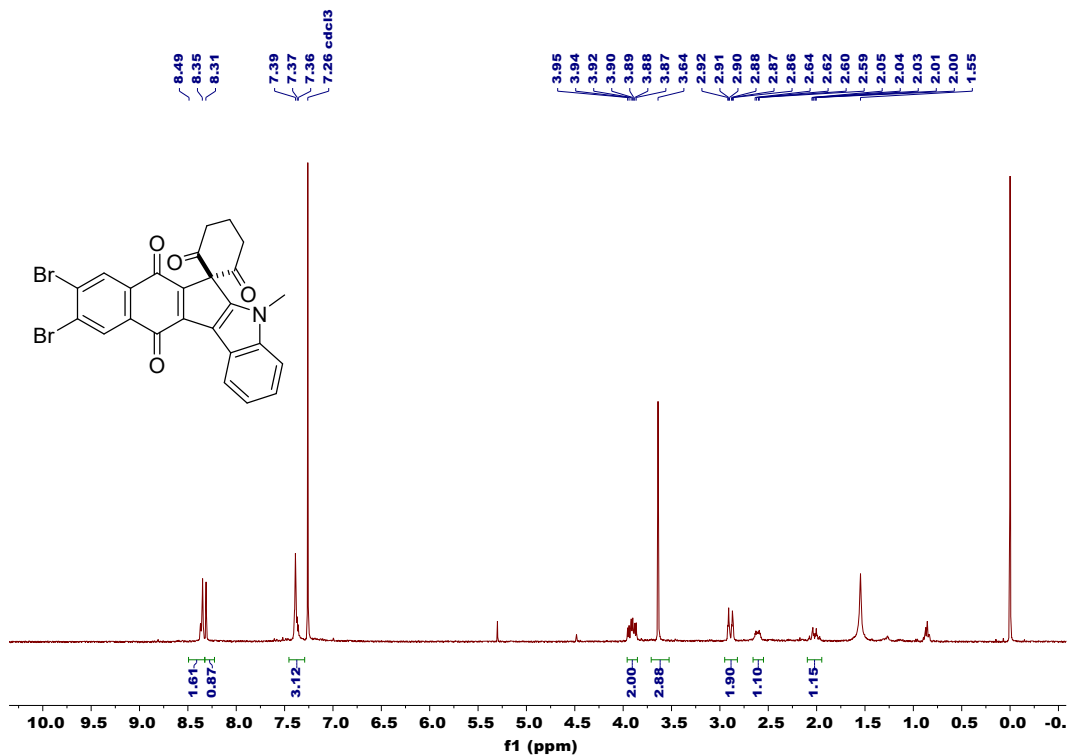

**<sup>13</sup>C NMR (101 MHz)**

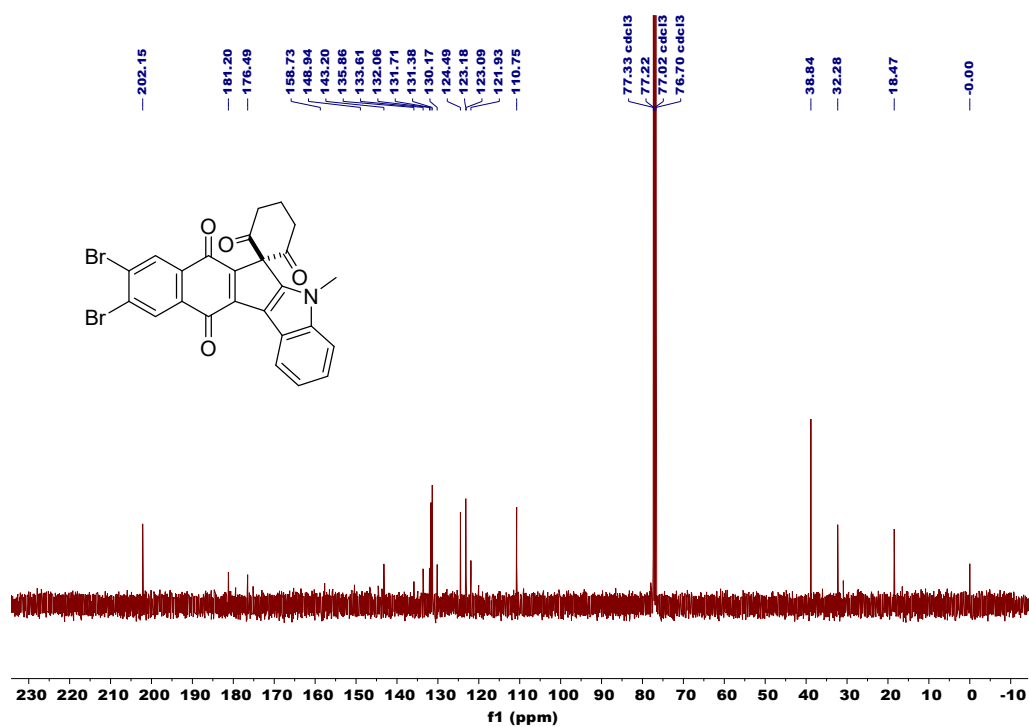

# 6,6-diacetyl-5-methyl-5,6-dihydrobenzo[5,6]indeno[2,1-*b*]indole-7,12-dione (3ab)

$^1\text{H}$  NMR (400 MHz)

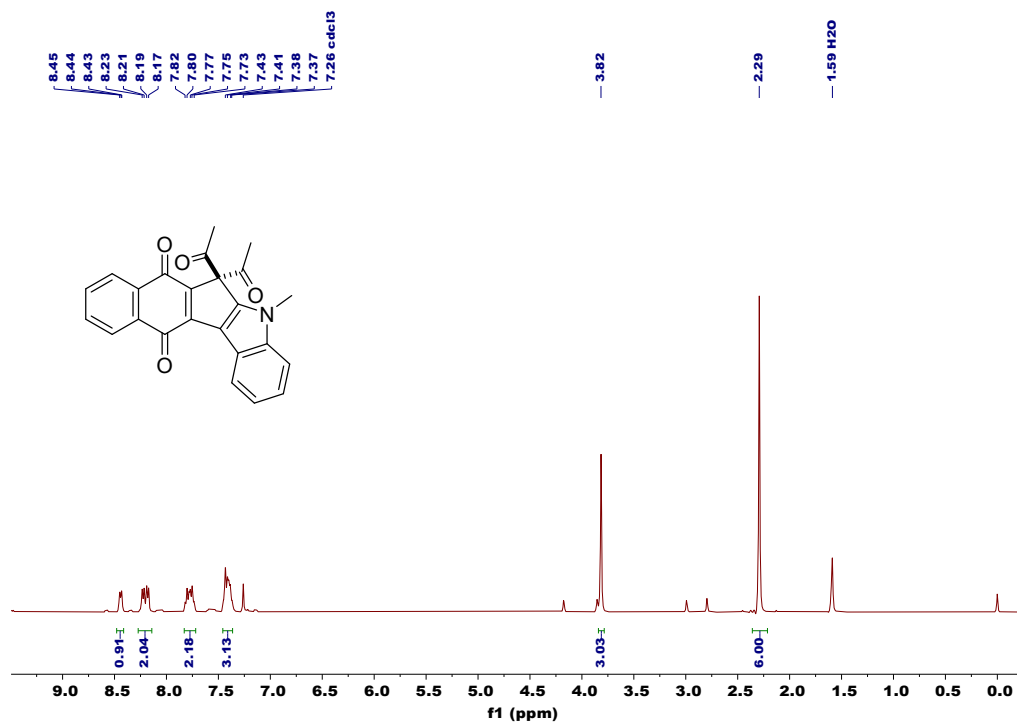

$^{13}\text{C}$  NMR (101 MHz)

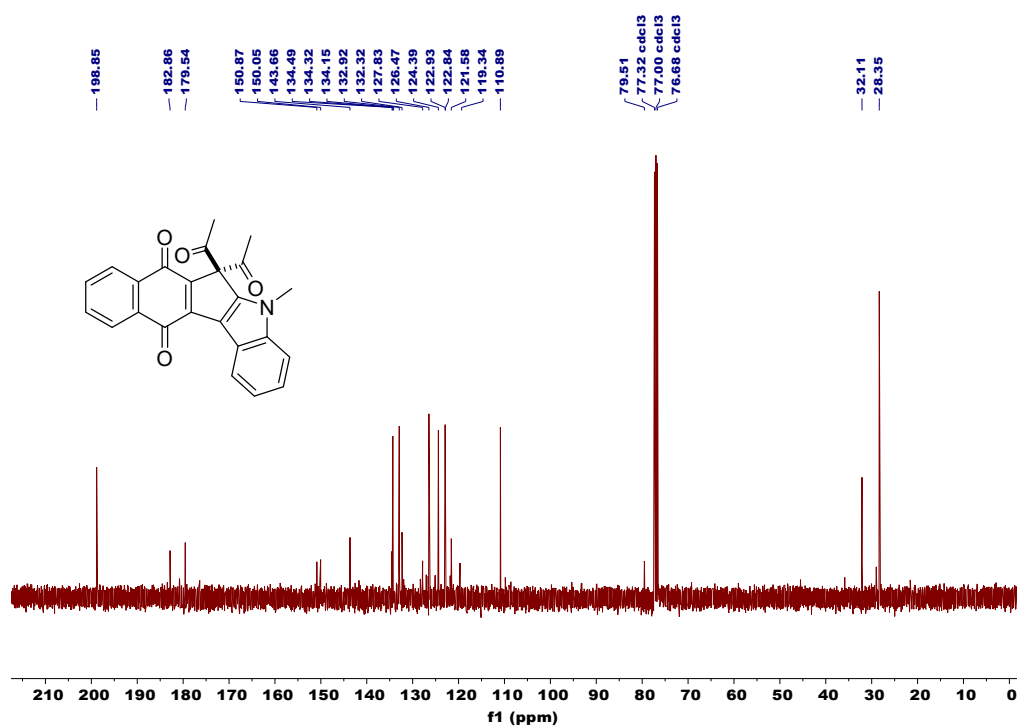

**5-methyl-5*H*-spiro[benzo[5,6]indeno[2,1-*b*]indole-6,1'-cyclopentane]-  
2',5',7,12-tetraone (3ac)**

**<sup>1</sup>H NMR (400 MHz)**

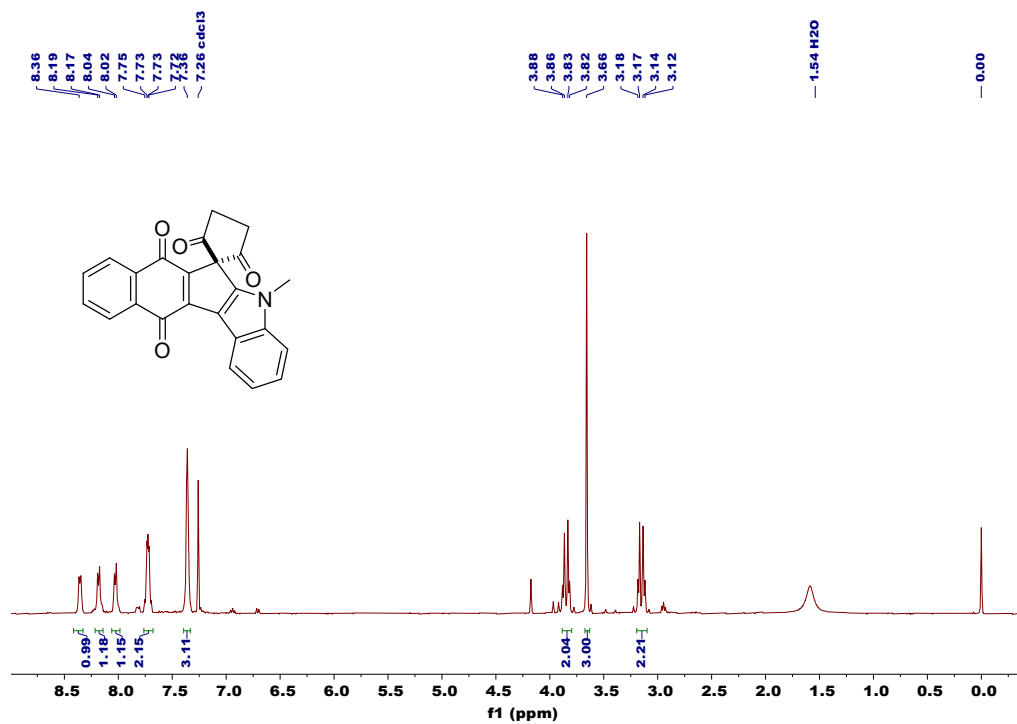

**<sup>13</sup>C NMR (101 MHz)**

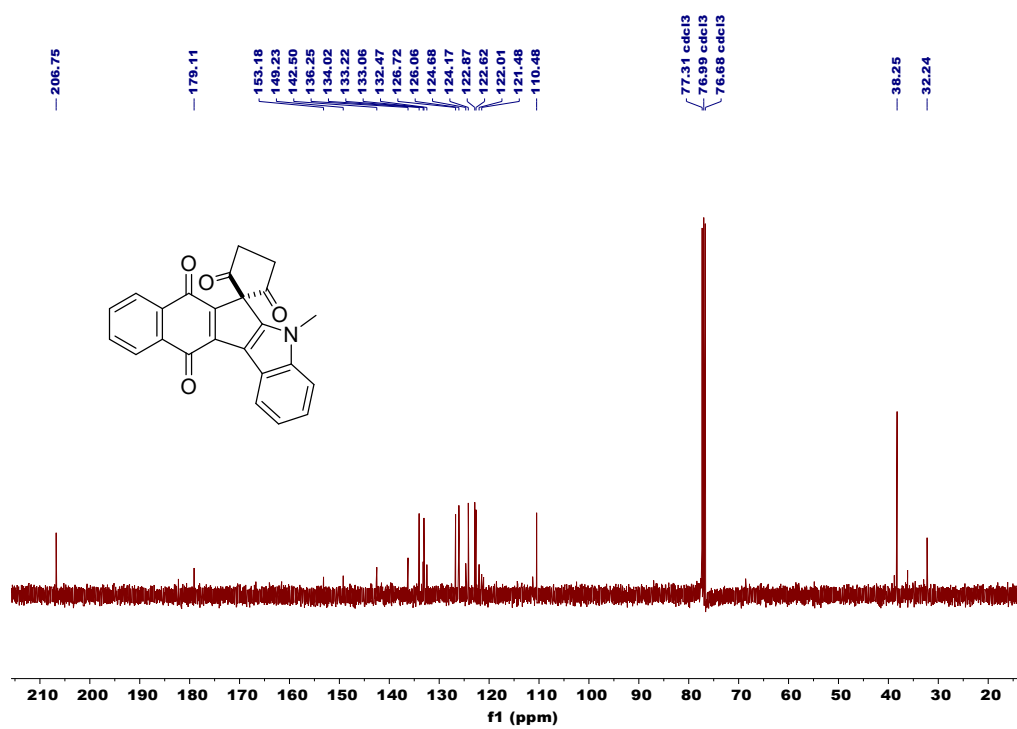

**4',5-dimethyl-5*H*-spiro[benzo[5,6]indeno[2,1-*b*]indole-6,1'-cyclohexane]-2',6',7,12-tetraone (3ad)**

**<sup>1</sup>H NMR (400 MHz)**

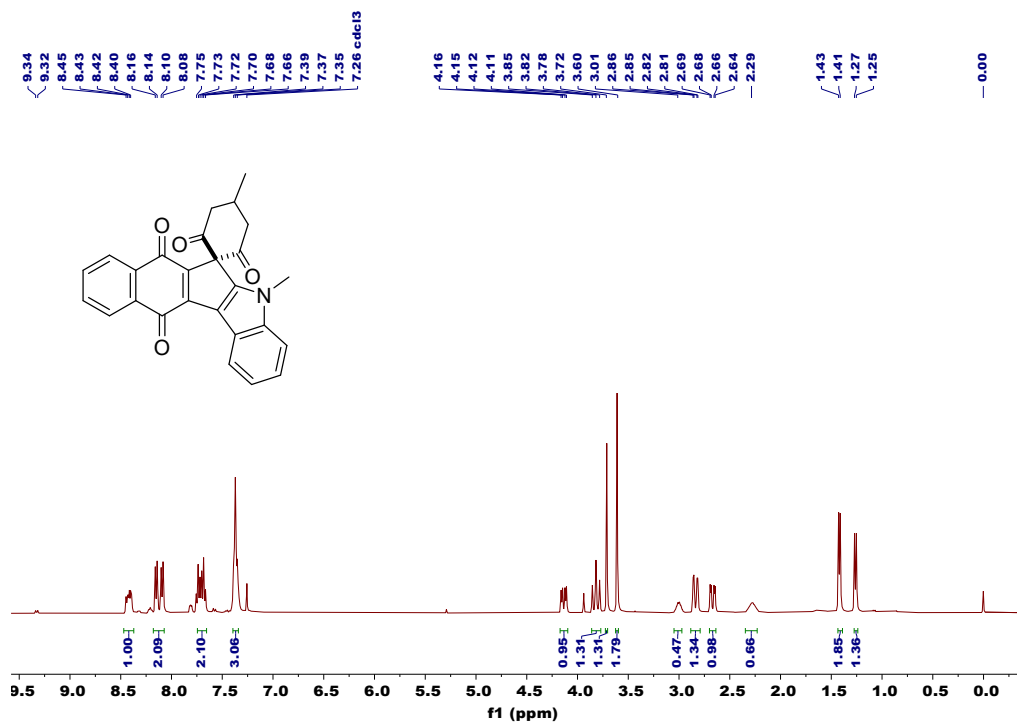

**<sup>13</sup>C NMR (101 MHz)**

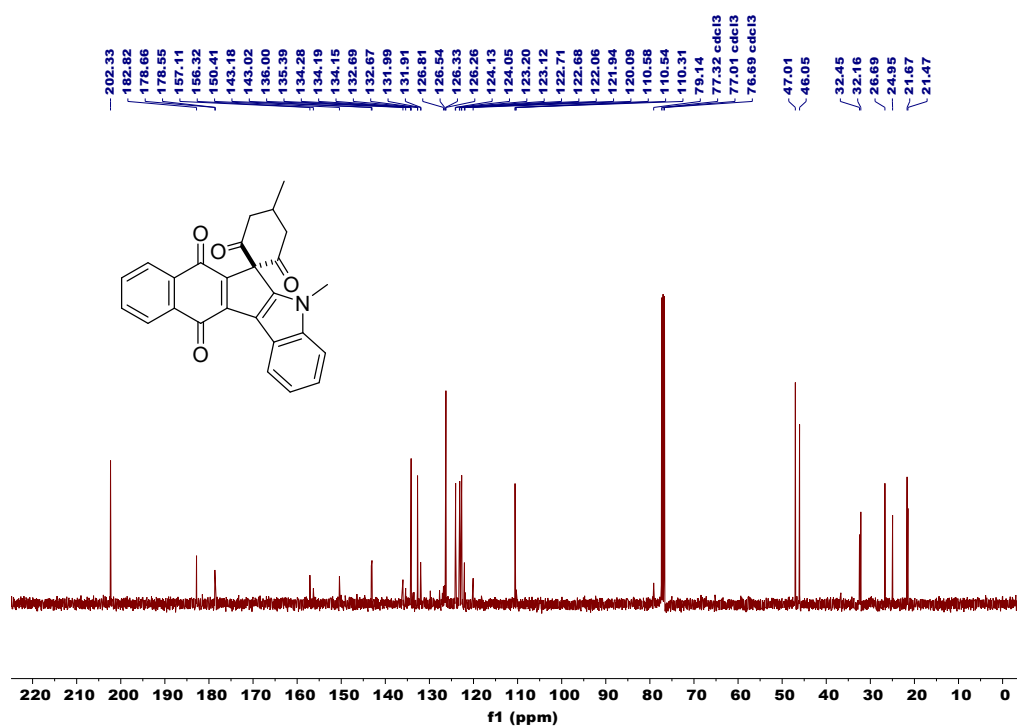

**5-methyl-4'-phenyl-5*H*-spiro[benzo[5,6]indeno[2,1-*b*]indole-6,1'-cyclohexane]-2',6',7,12-tetraone (3ae)**

**<sup>1</sup>H NMR (400 MHz)**

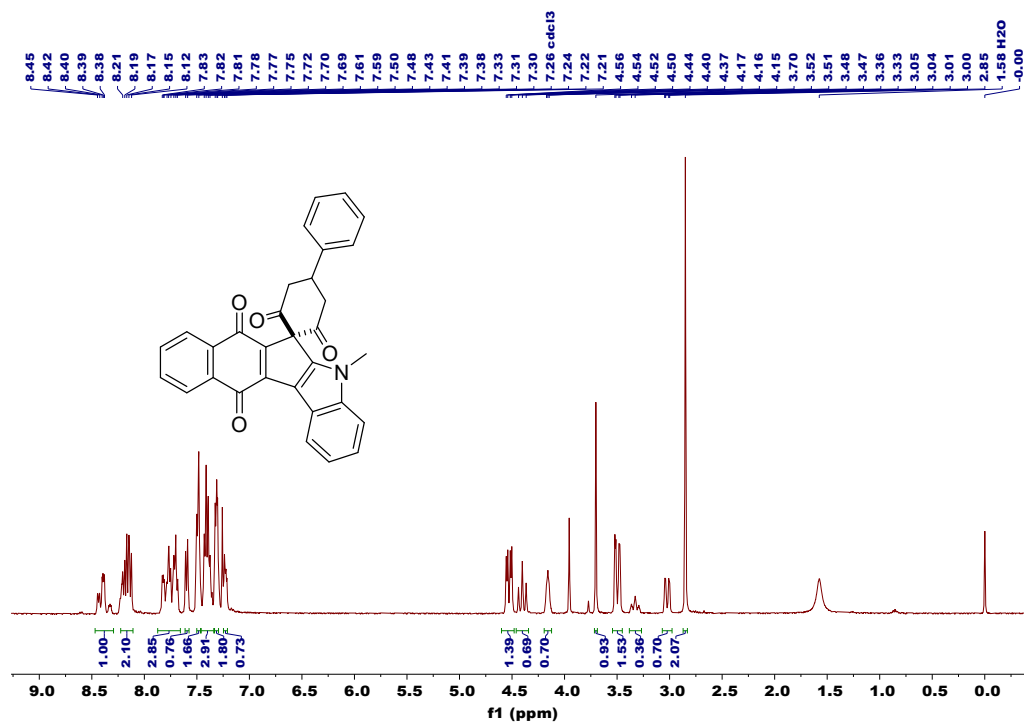

**<sup>13</sup>C NMR (101 MHz)**

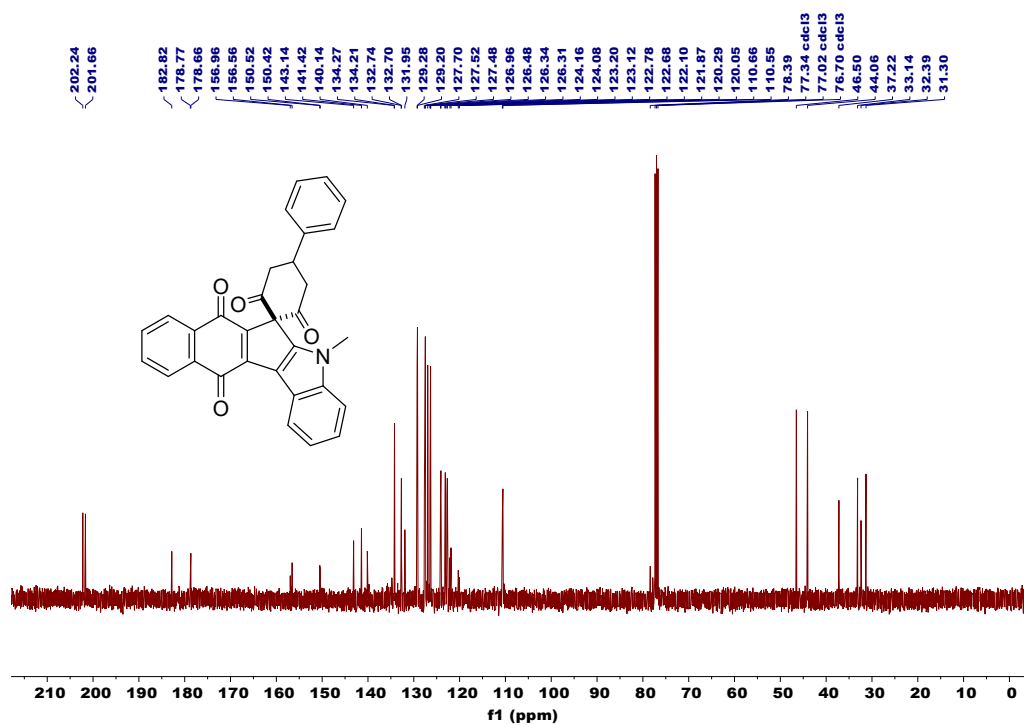

**4',4',5-trimethyl-5*H*-spiro[benzo[5,6]indeno[2,1-*b*]indole-6,1'-cyclohexane]-2',6',7,12-tetraone (3af)**

**<sup>1</sup>H NMR (400 MHz)**

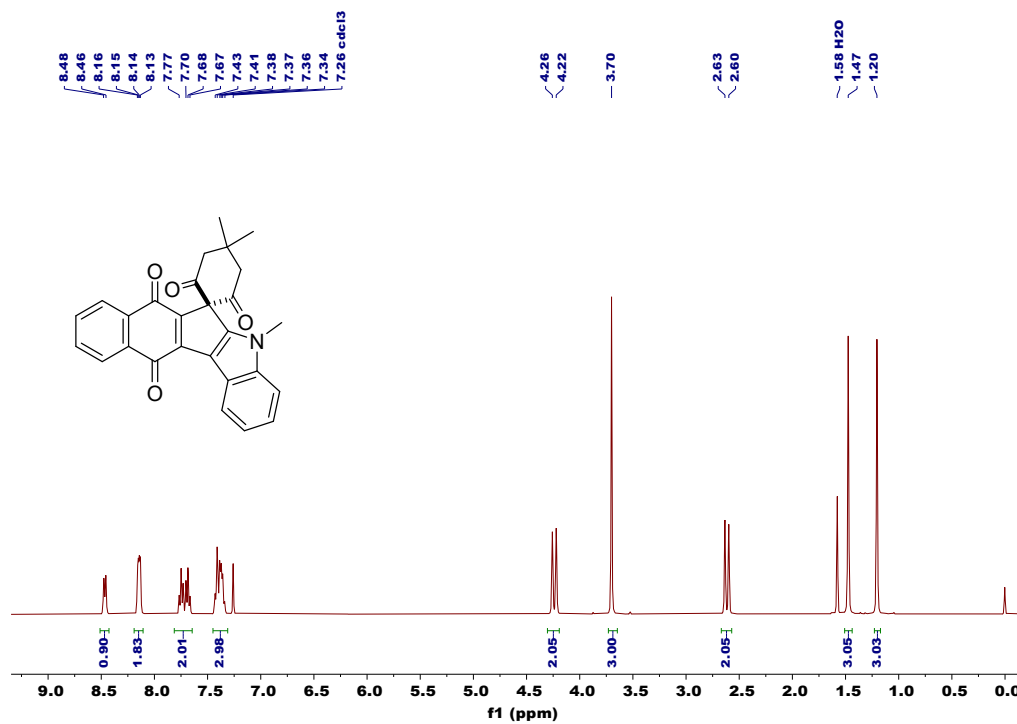

**<sup>13</sup>C NMR (101 MHz)**

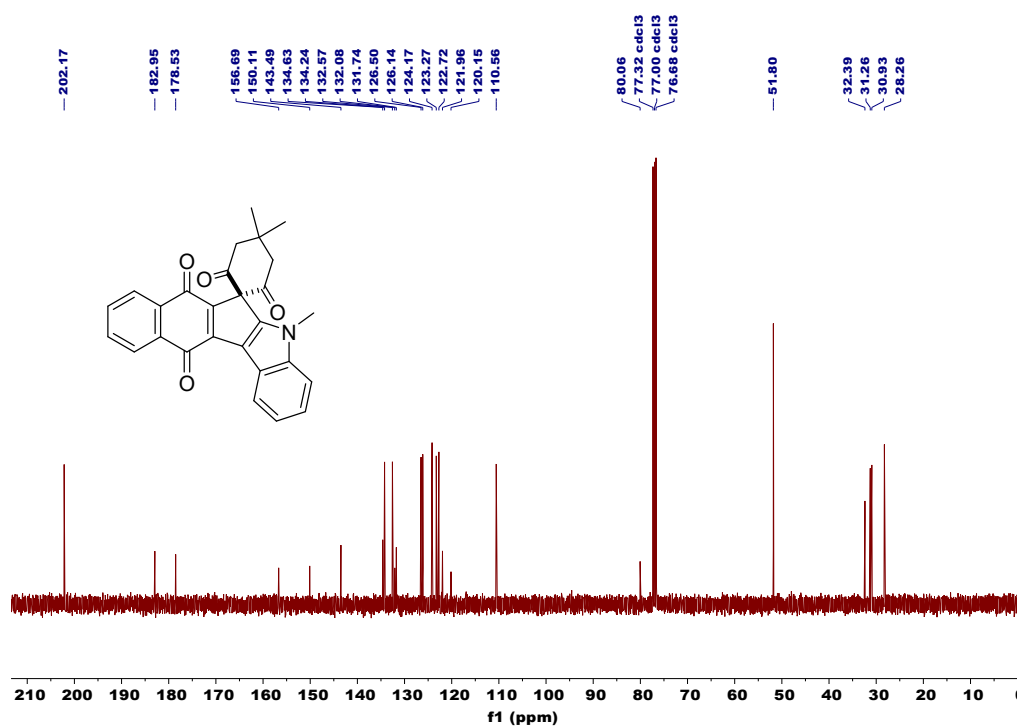

**5-methyl-5*H*-dispiro[benzo[5,6]indeno[2,1-*b*]indole-6,1'-cyclohexane-4',1''-cyclohexane]-2',6',7,12-tetraone (3ag)**

**<sup>1</sup>H NMR (400 MHz)**

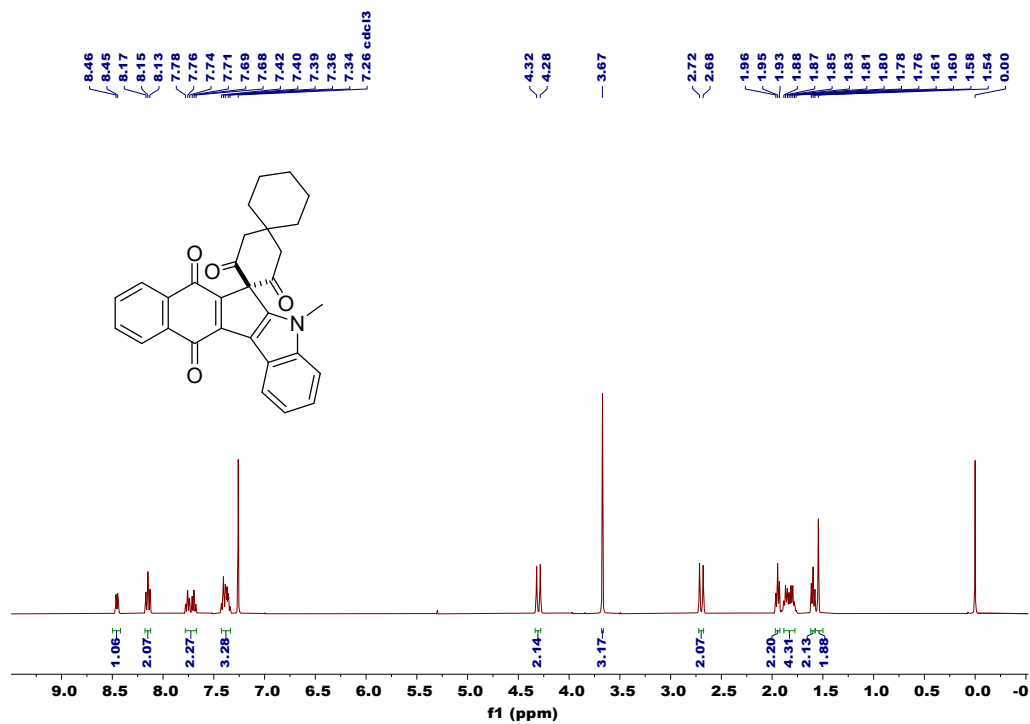

**<sup>13</sup>C NMR (101 MHz)**

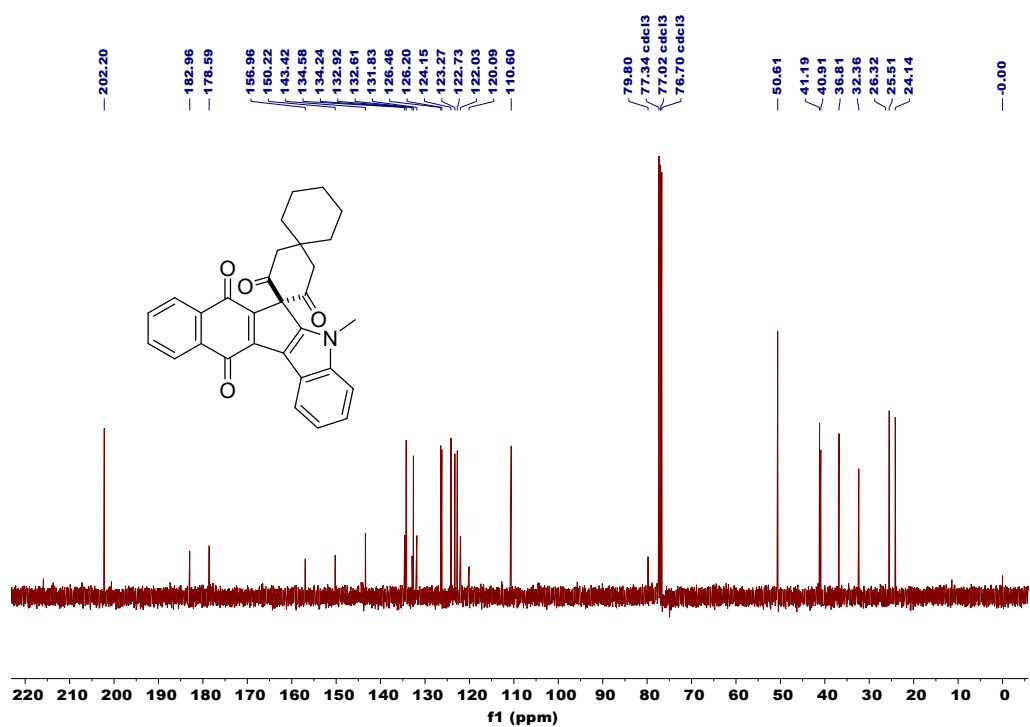

**5-methyl-5*H*-spiro[benzo[5,6]indeno[2,1-*b*]indole-6,1'-cycloheptane]-  
2',7,7',12-tetraone (3ah)**

**<sup>1</sup>H NMR (400 MHz)**

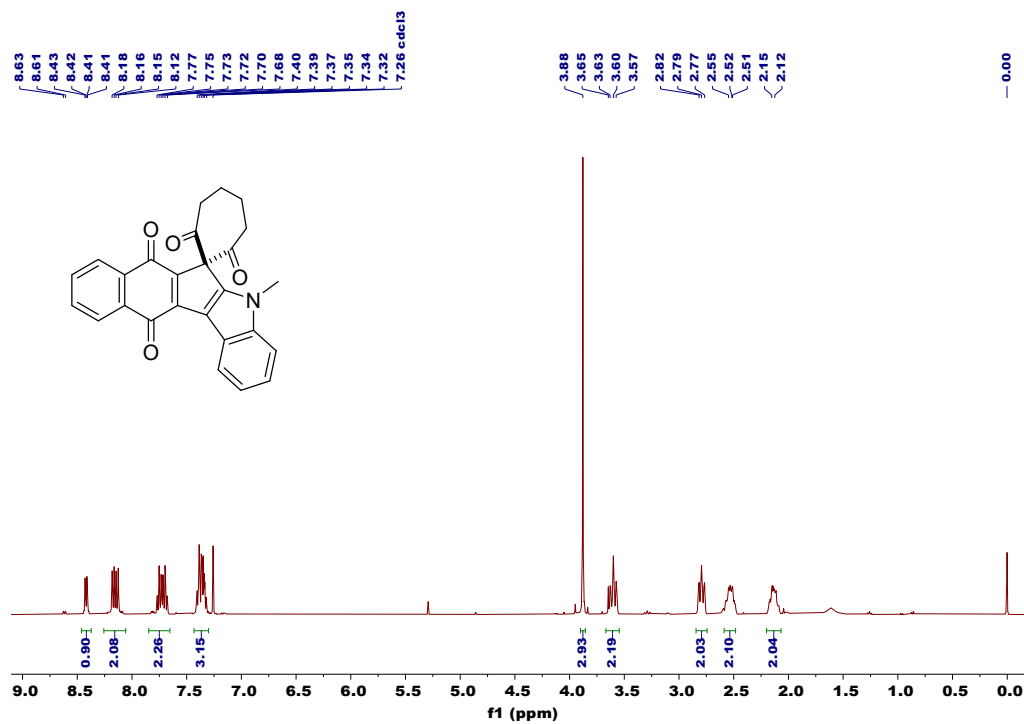

**<sup>13</sup>C NMR (101 MHz)**

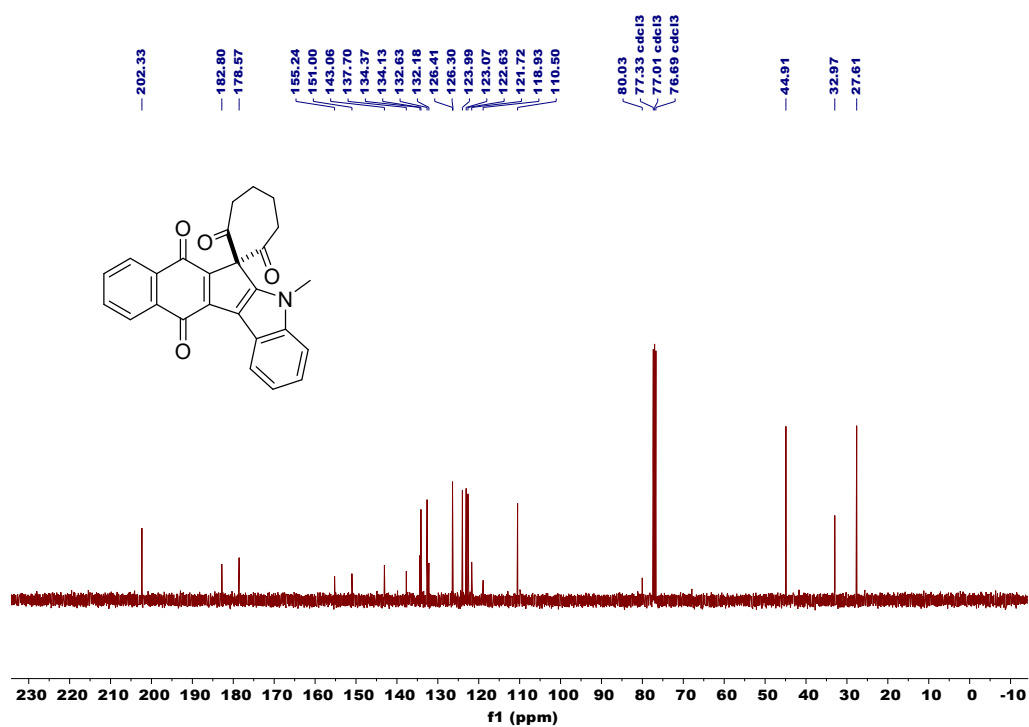



**1',3',5-trimethyl-2'H,5H-spiro[benzo[5,6]indeno[2,1-b]indole-6,5'-pyrimidine]-2',4',6',7,12(1'H,3'H)-pentaone (3ai)**

**<sup>1</sup>H NMR (400 MHz)**

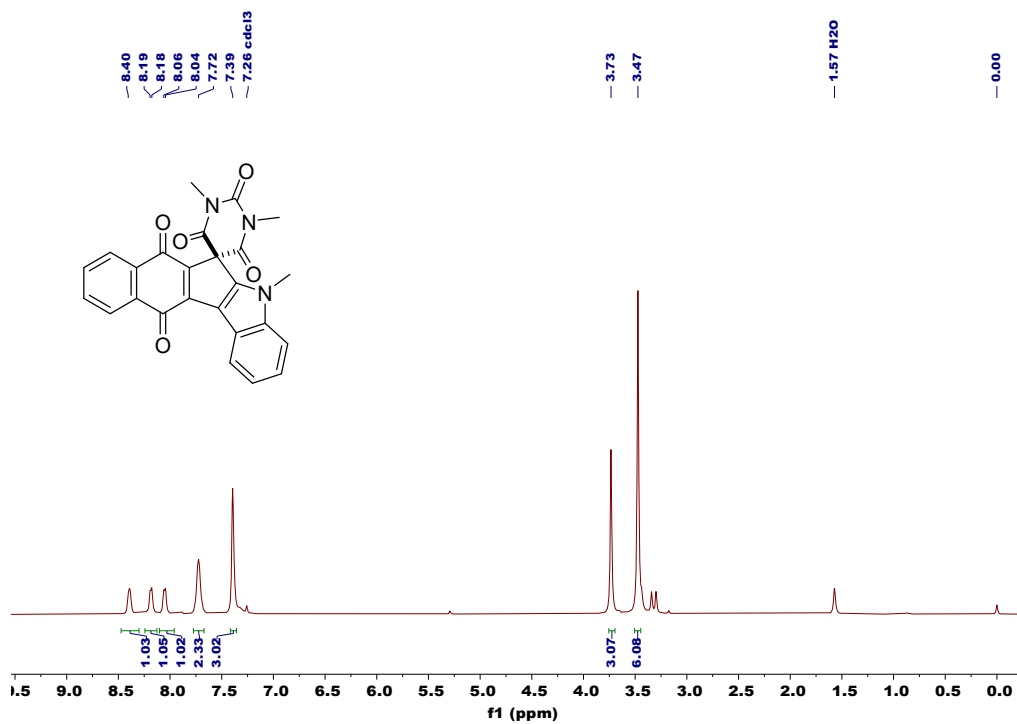

**<sup>13</sup>C NMR (101 MHz)**

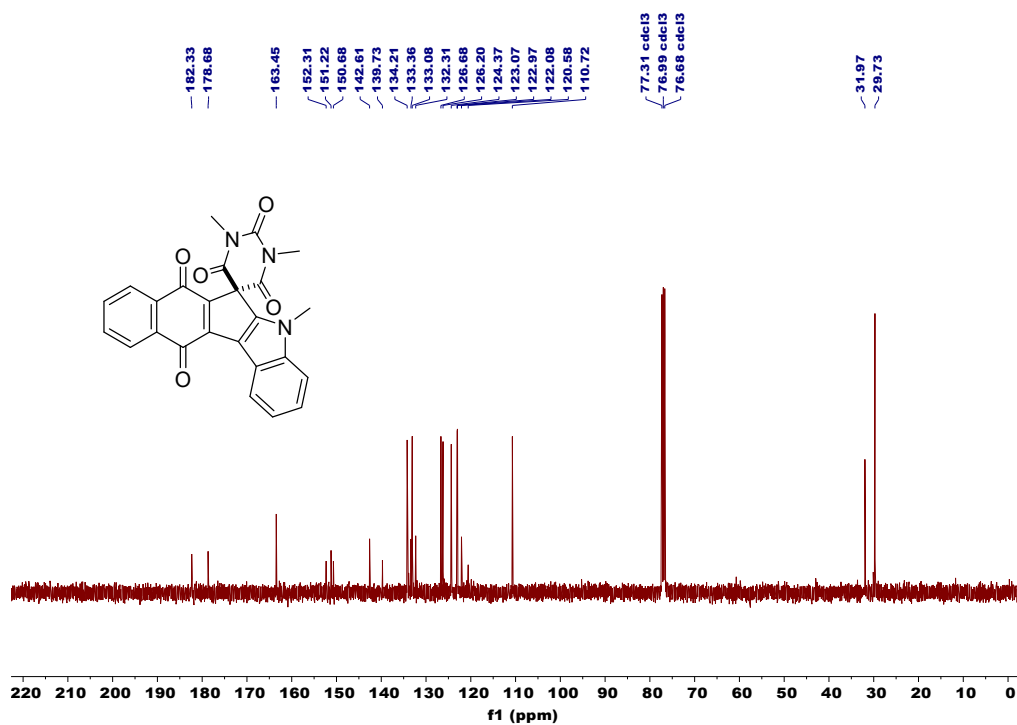

**5-methyl-1',2'-diphenyl-5*H*-spiro[benzo[5,6]indeno[2,1-*b*]indole-6,4'-pyrazolidine]-3',5',7,12-tetraone (3aj)**

**<sup>1</sup>H NMR (400 MHz)**

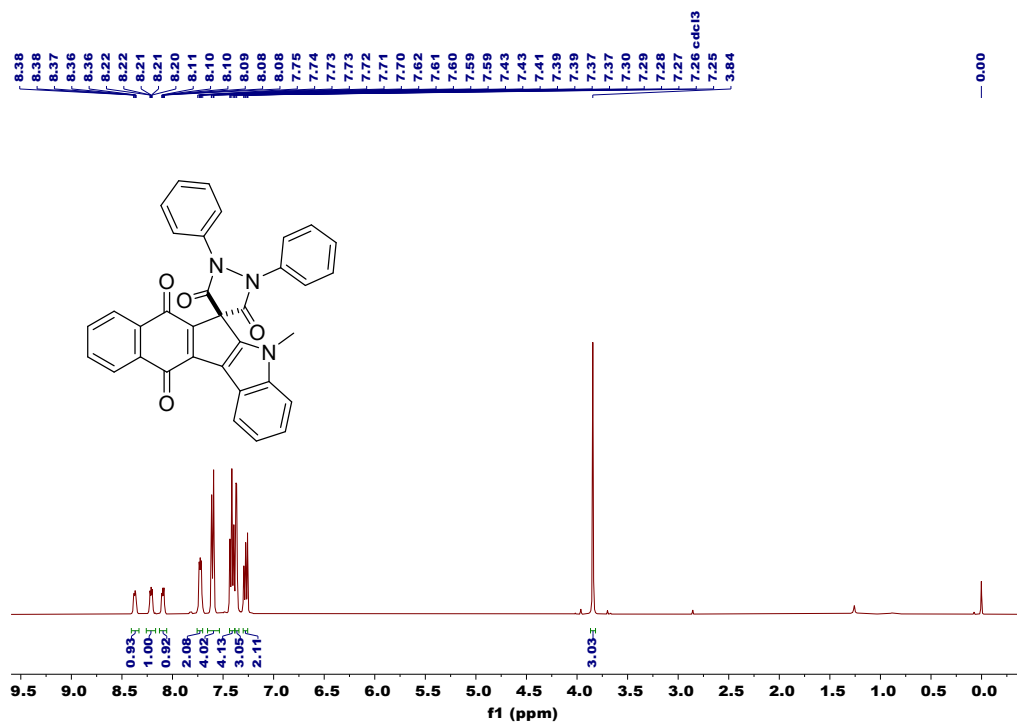

**<sup>13</sup>C NMR (101 MHz)**

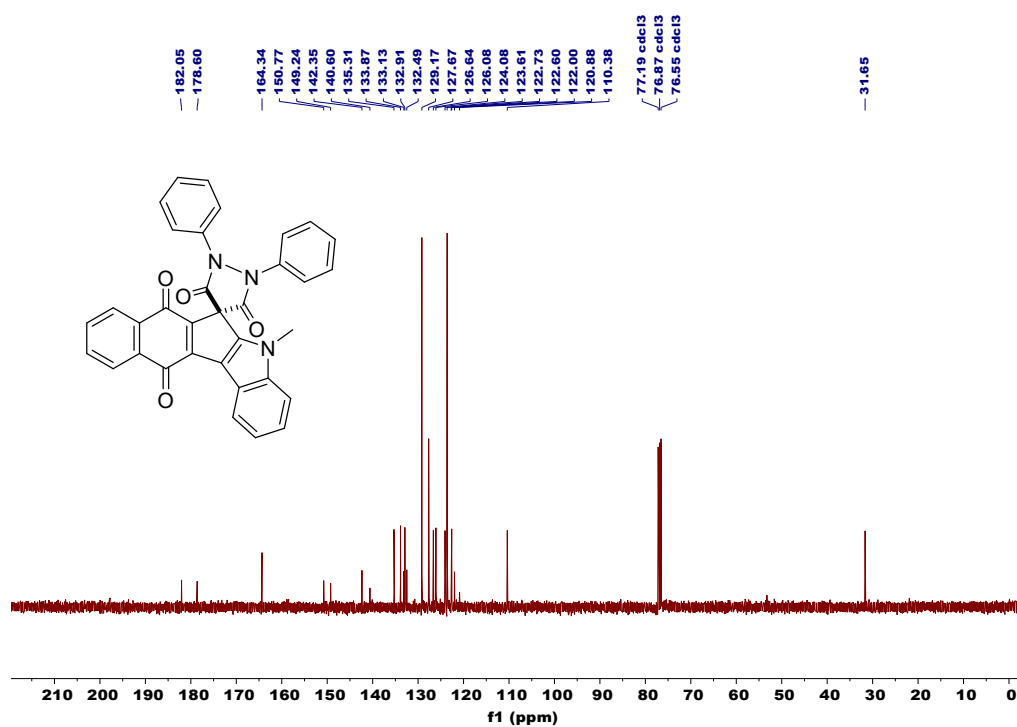

# 2-(6-chloro-1-methyl-1H-indol-3-yl)-3-(2-hydroxy-6-oxocyclohex-1-en-1-yl)naphthalene-1,4-dione (4ka)

$^1\text{H}$  NMR (400 MHz)

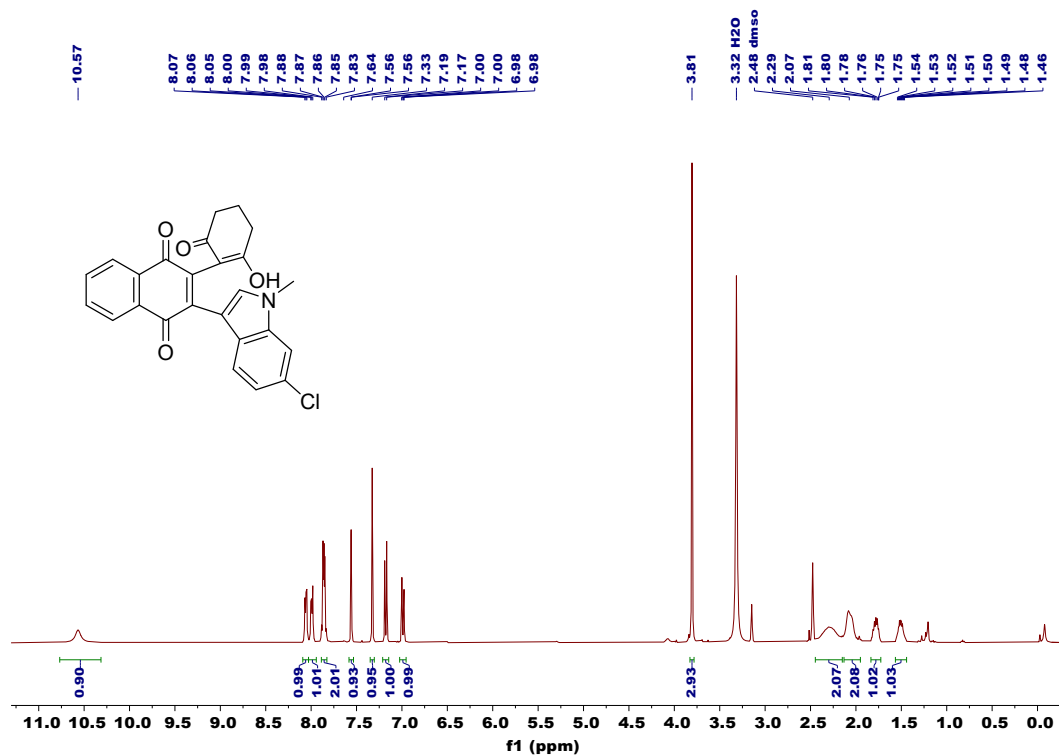

$^{13}\text{C}$  NMR (101 MHz)

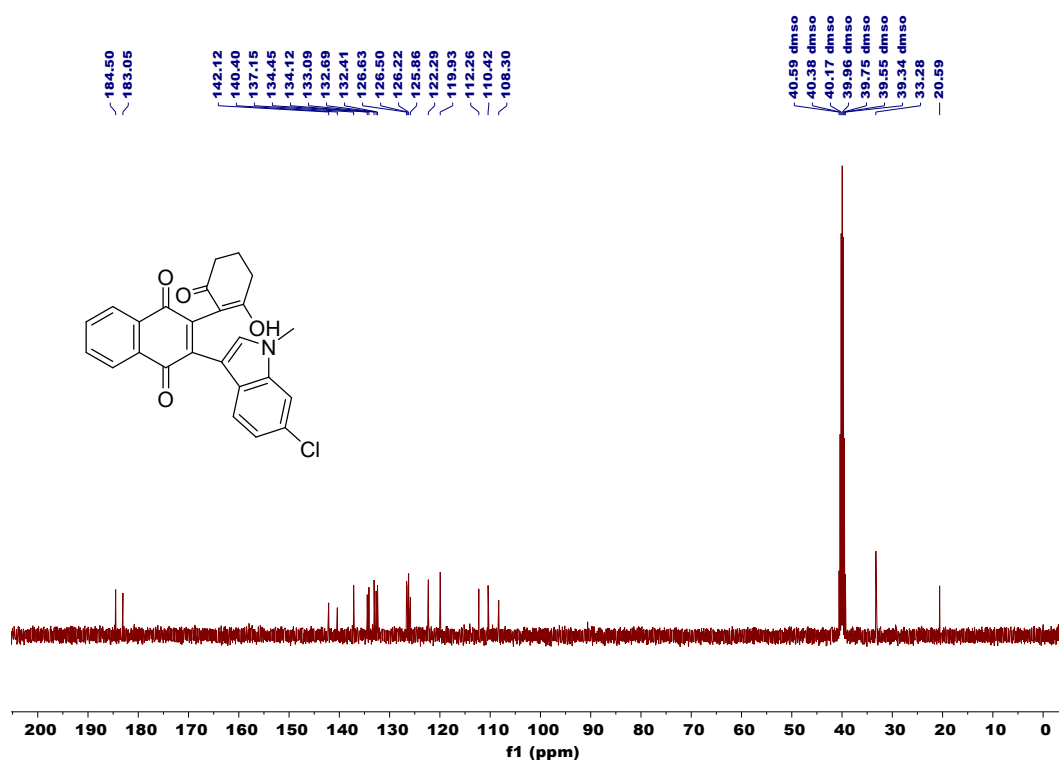

Supplement: d4qo00708e1.pdf [file d4qo00708e1.pdf]
